# Supplementary material for: Selective steroidogenic cytochrome P450 haem iron ligation by steroid-derived isonitriles
Source: PubMed Central journal article supplement (PMC10475101; doi:10.1038/s42004-023-00994-3), 2023-09-02

pregnalone-derived isonitrile **1c** (both C20 epimers present)

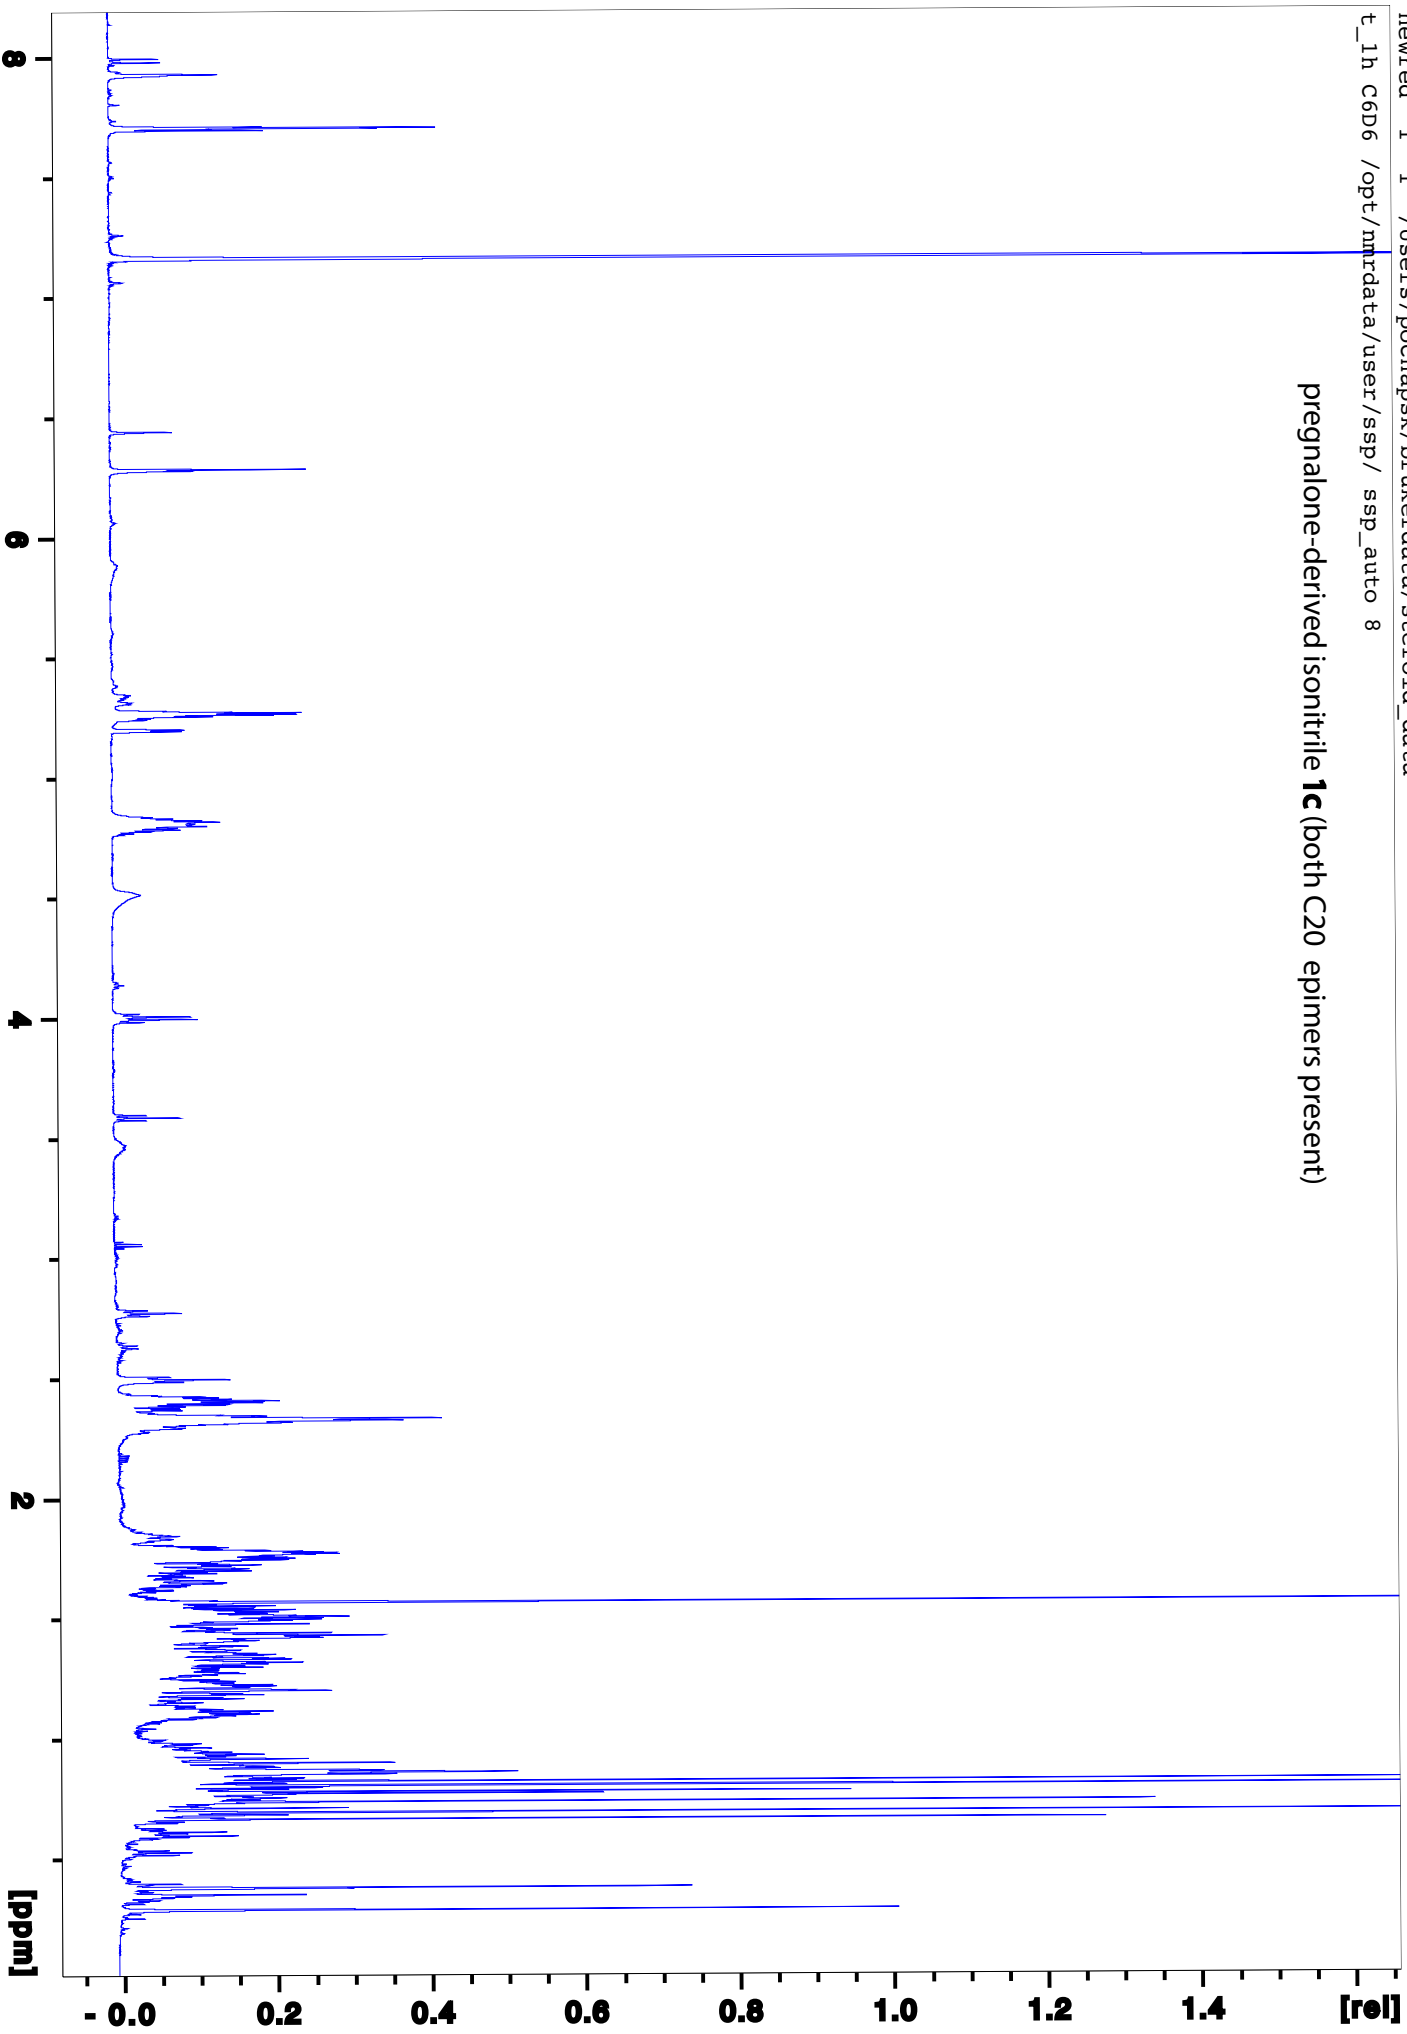

pregnanalone-derived isonitrile **1c** <sup>13</sup>C spectrum (both C20 epimers)

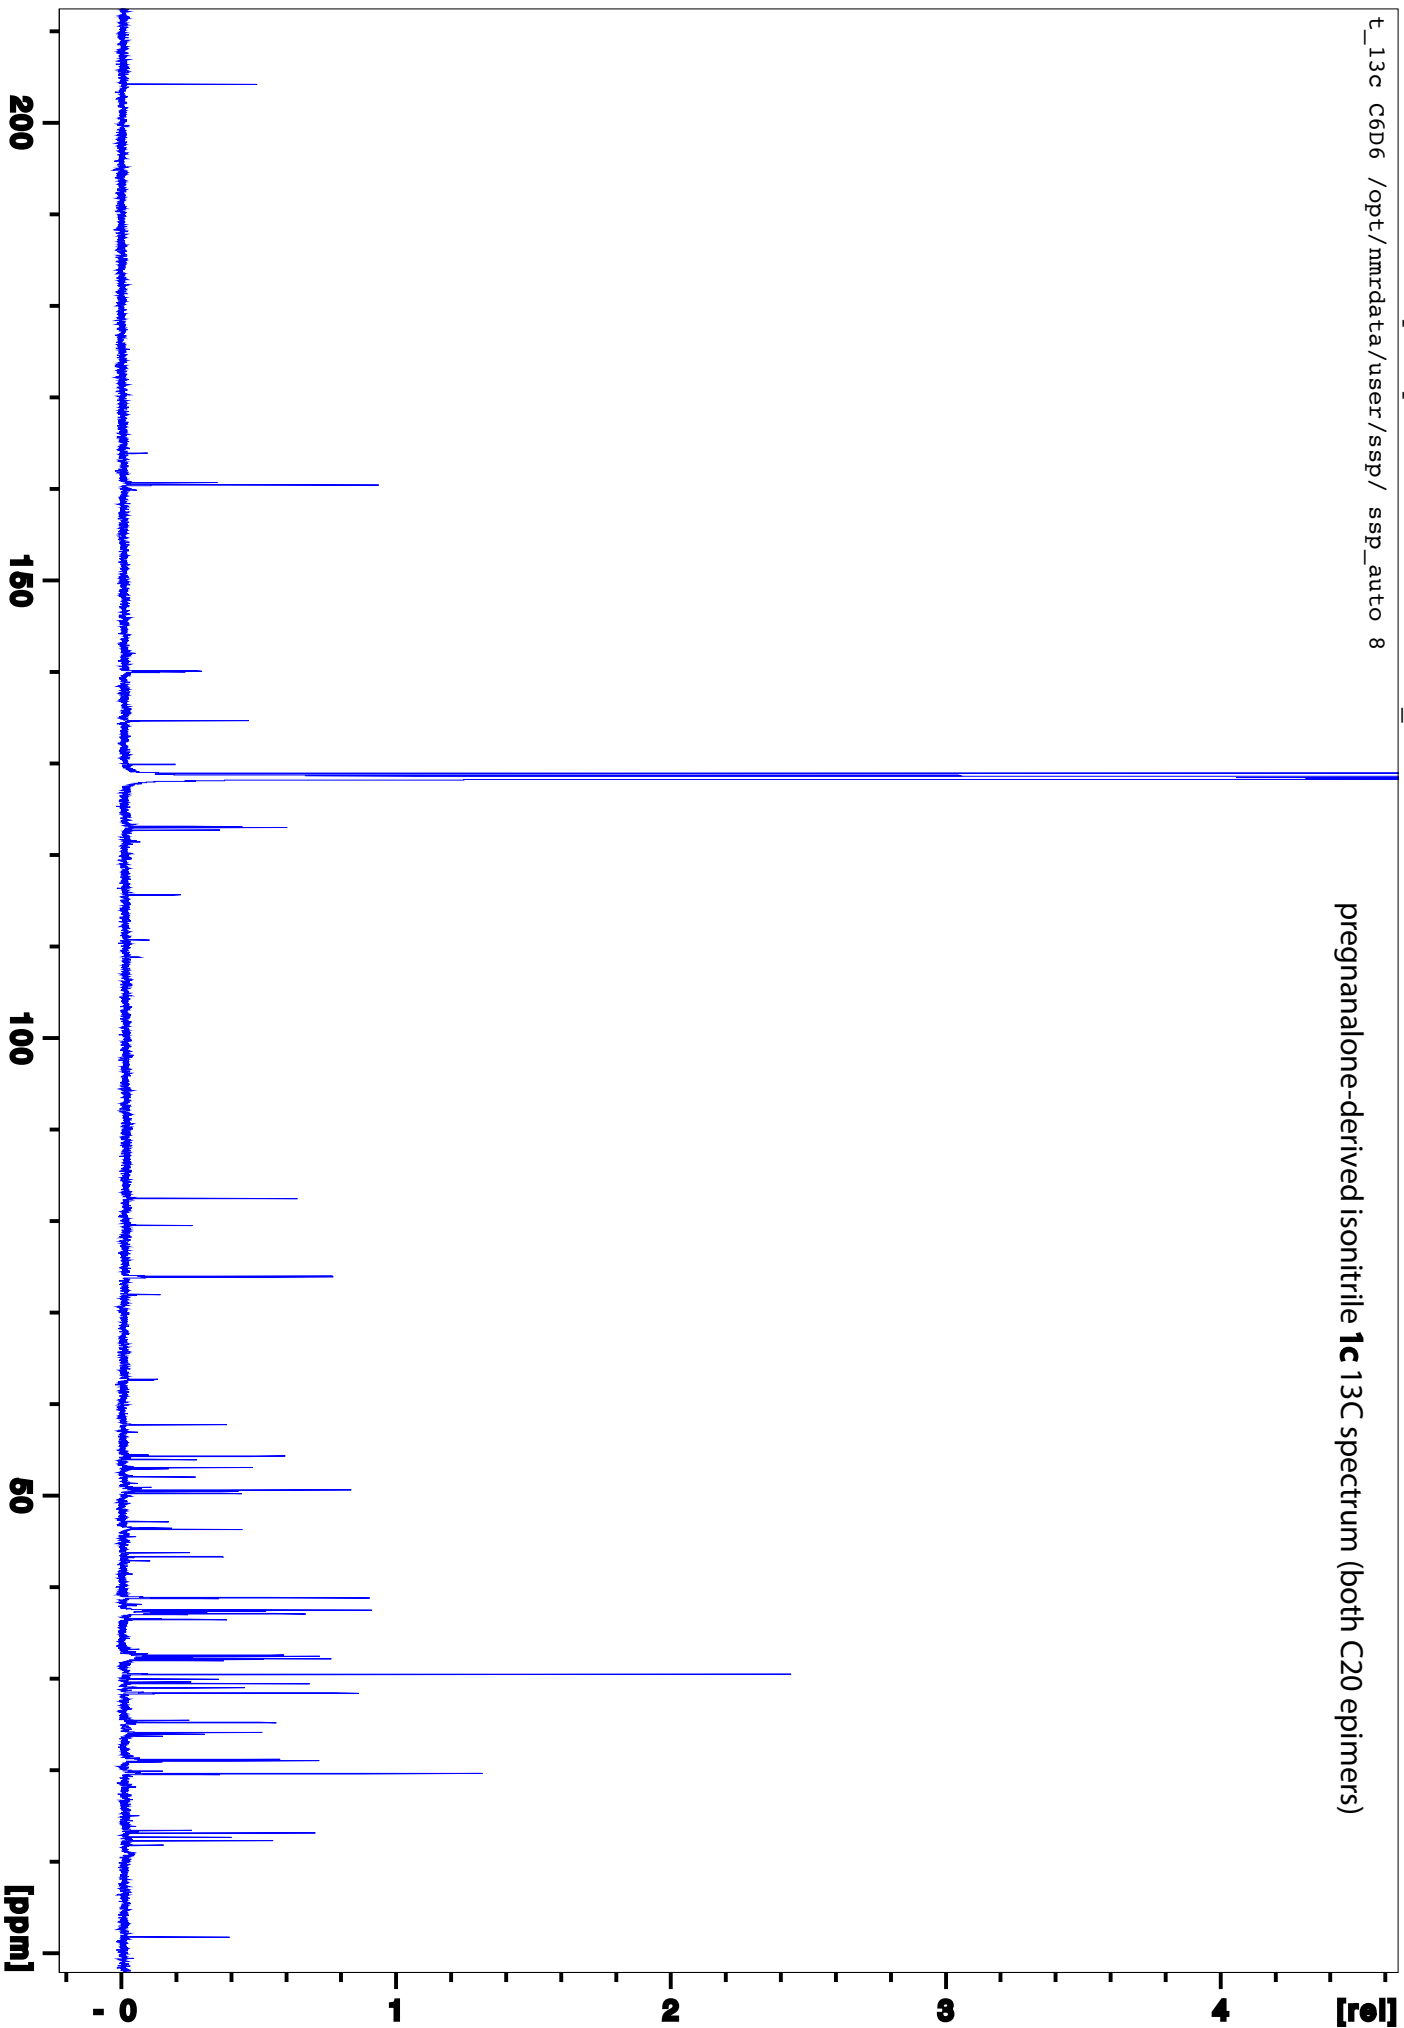

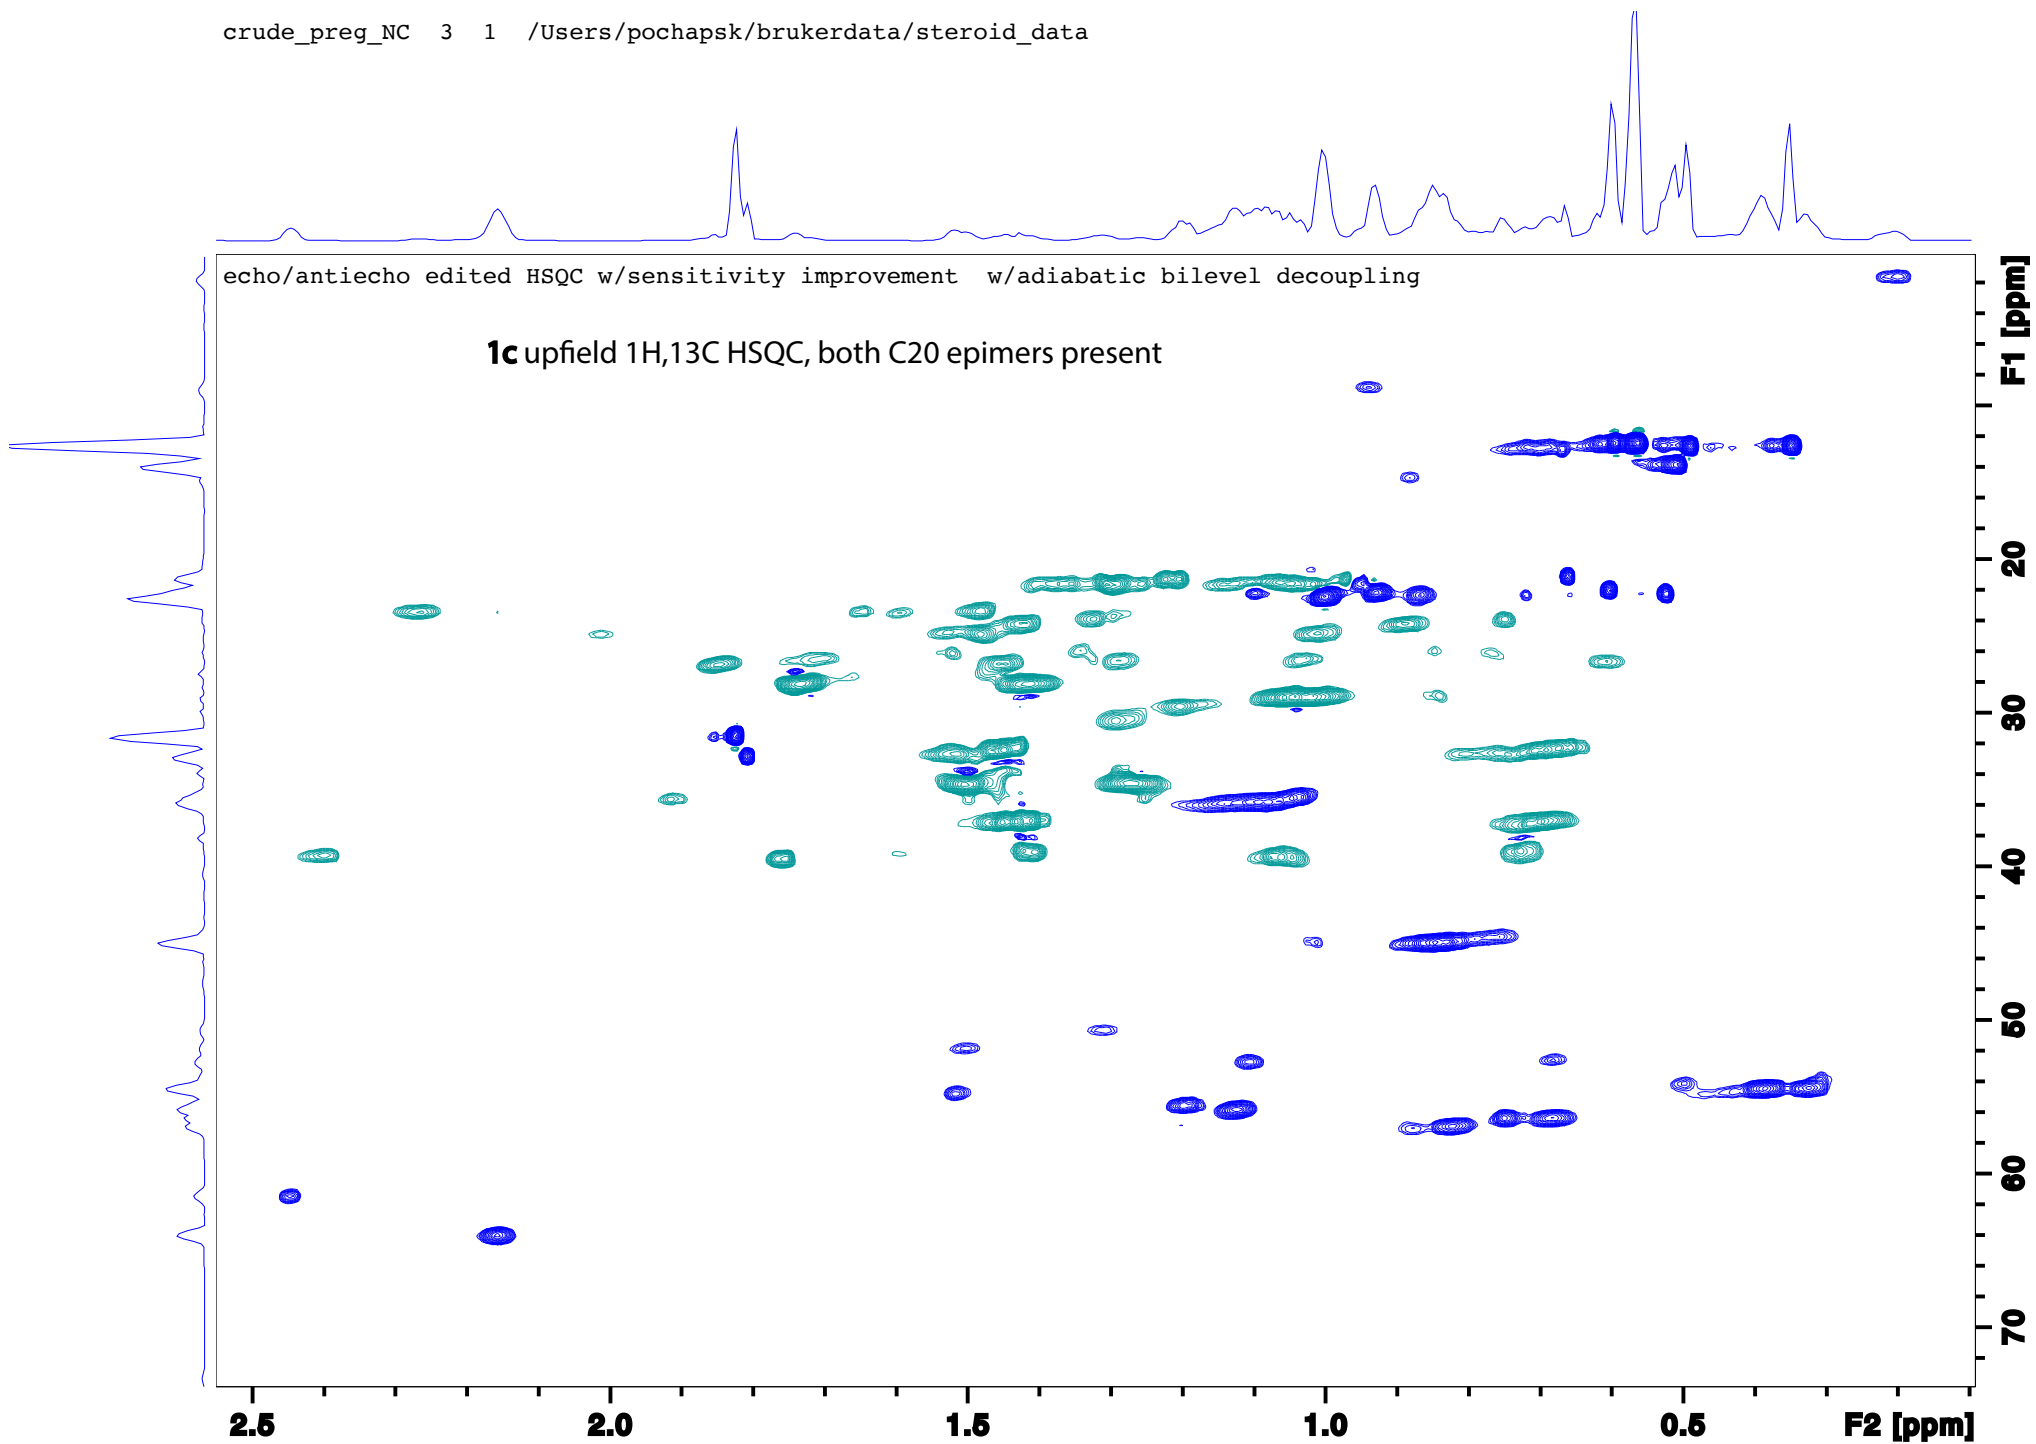

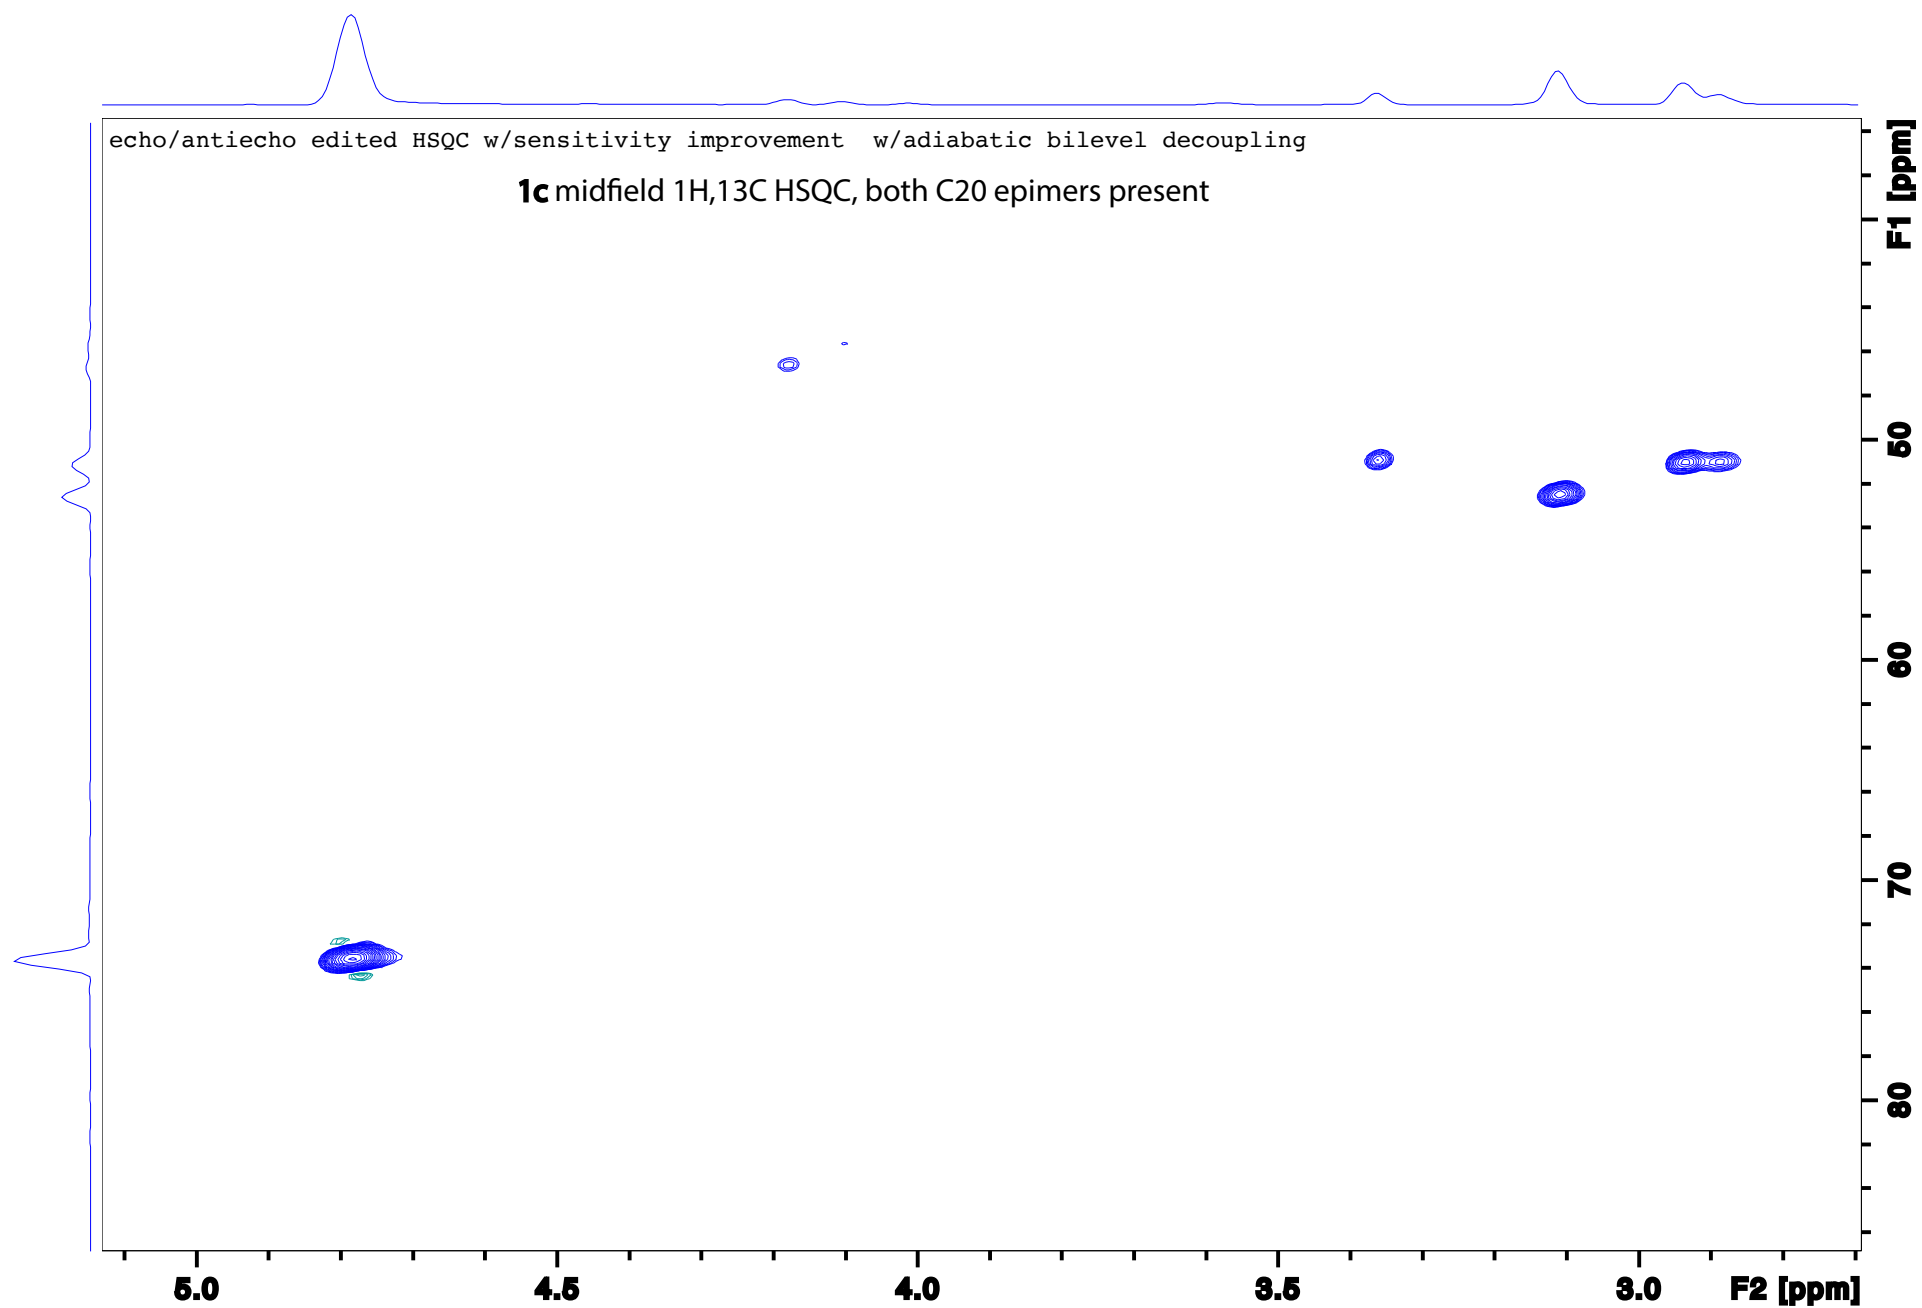

crude\_preg\_NC 3 1 /Users/pochapsk/brukerdata/steroid\_data

echo/antiecho edited HSQC w/sensitivity improvement w/adiabatic bilevel decoupling

**1c** downfield 1H,13C HSQC, both C20 epimers present

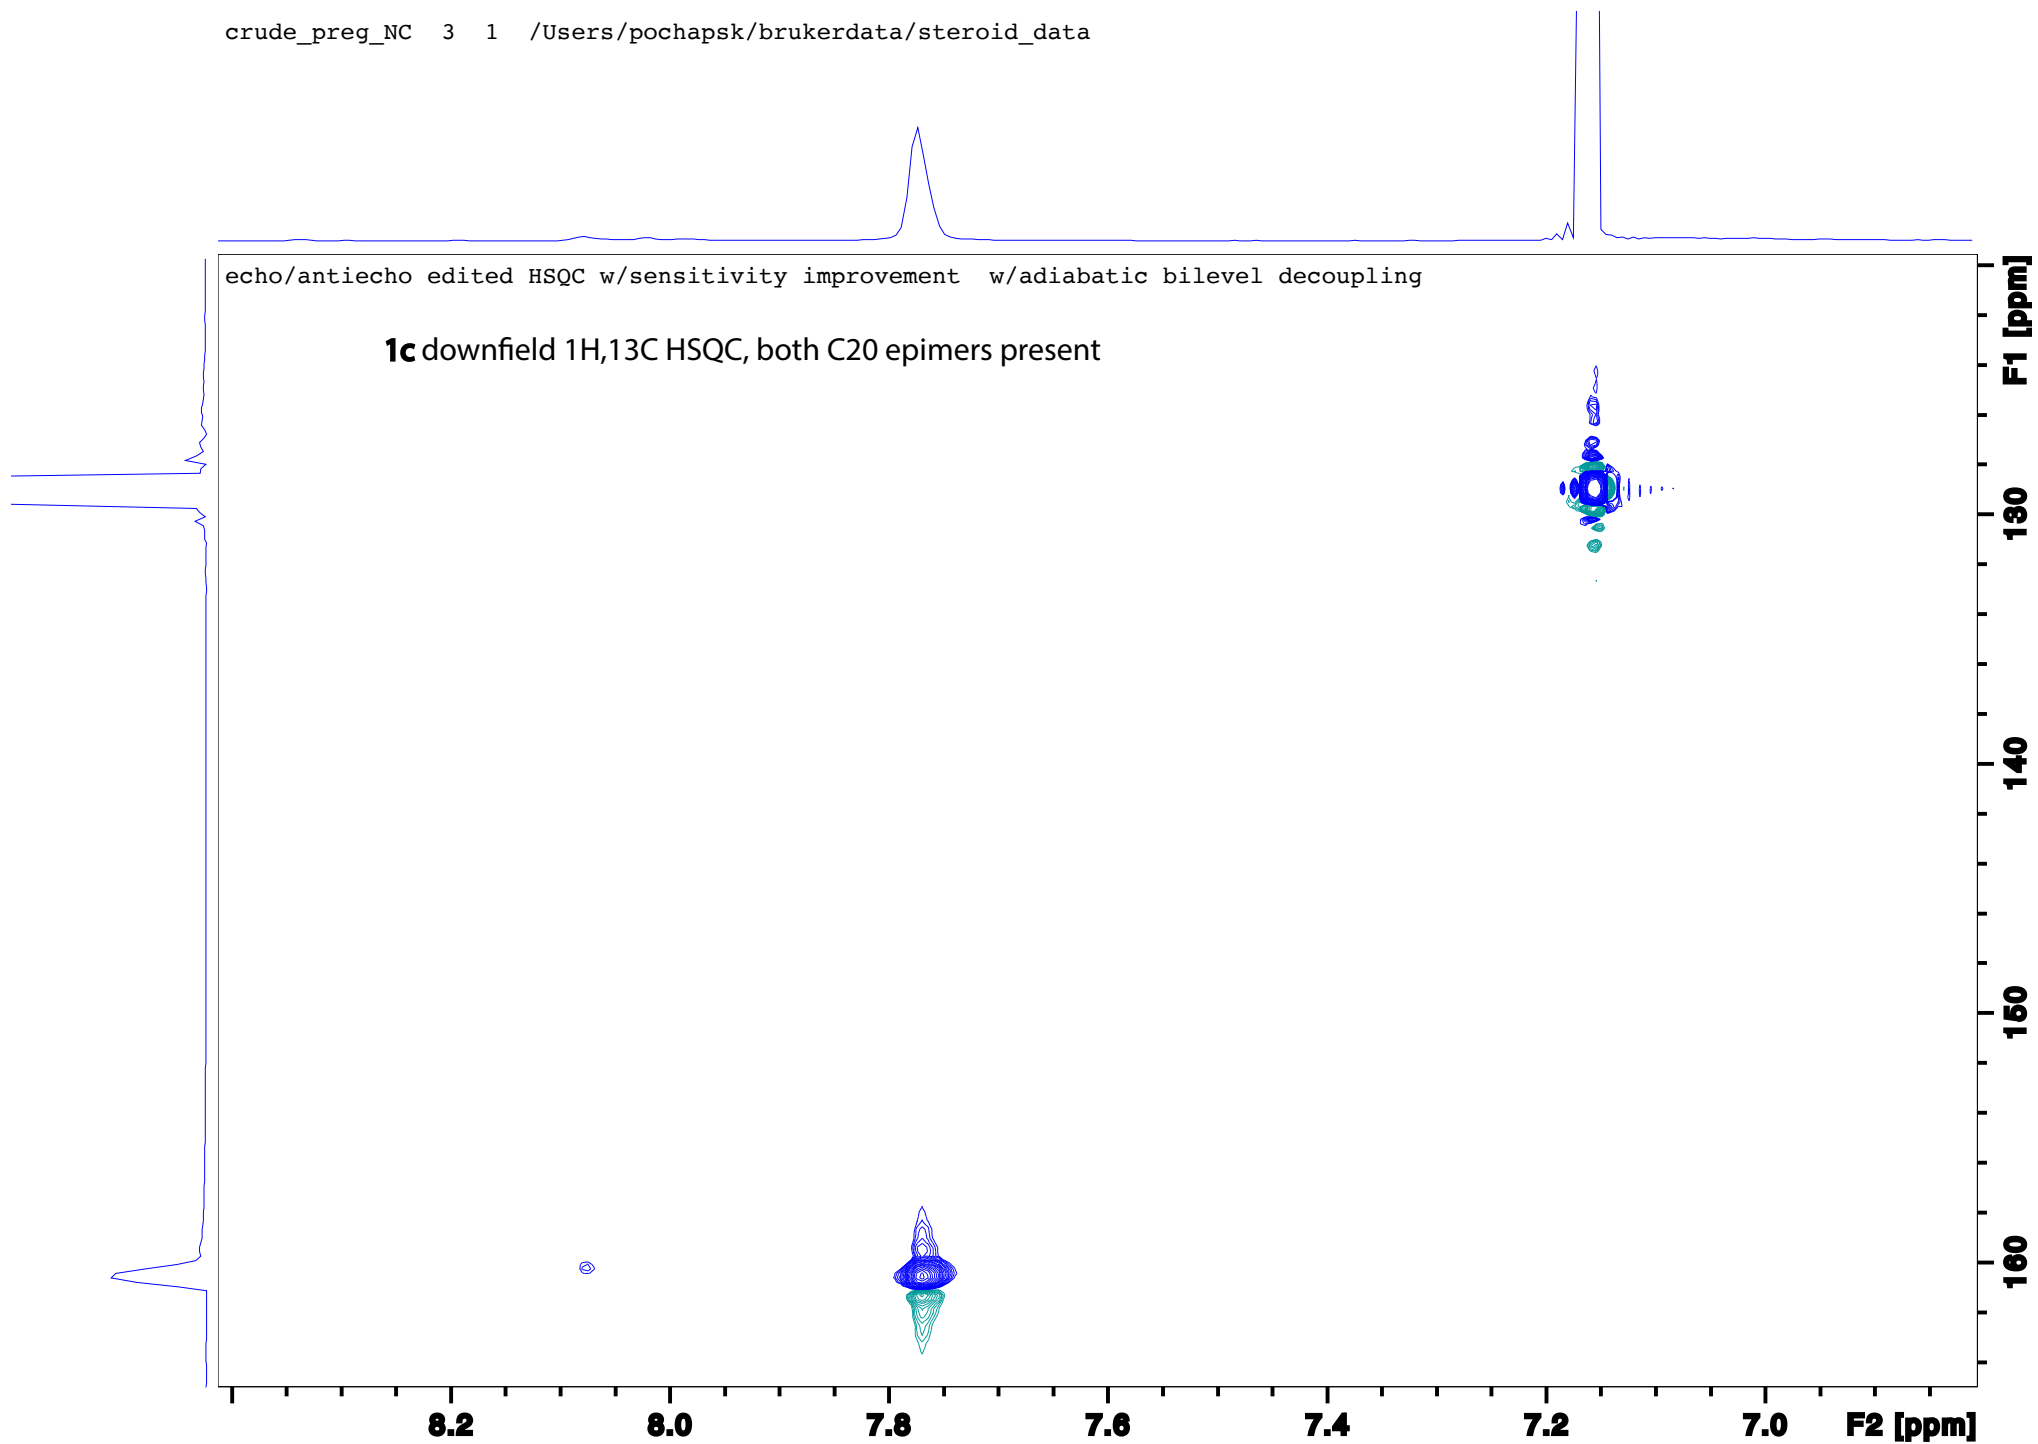

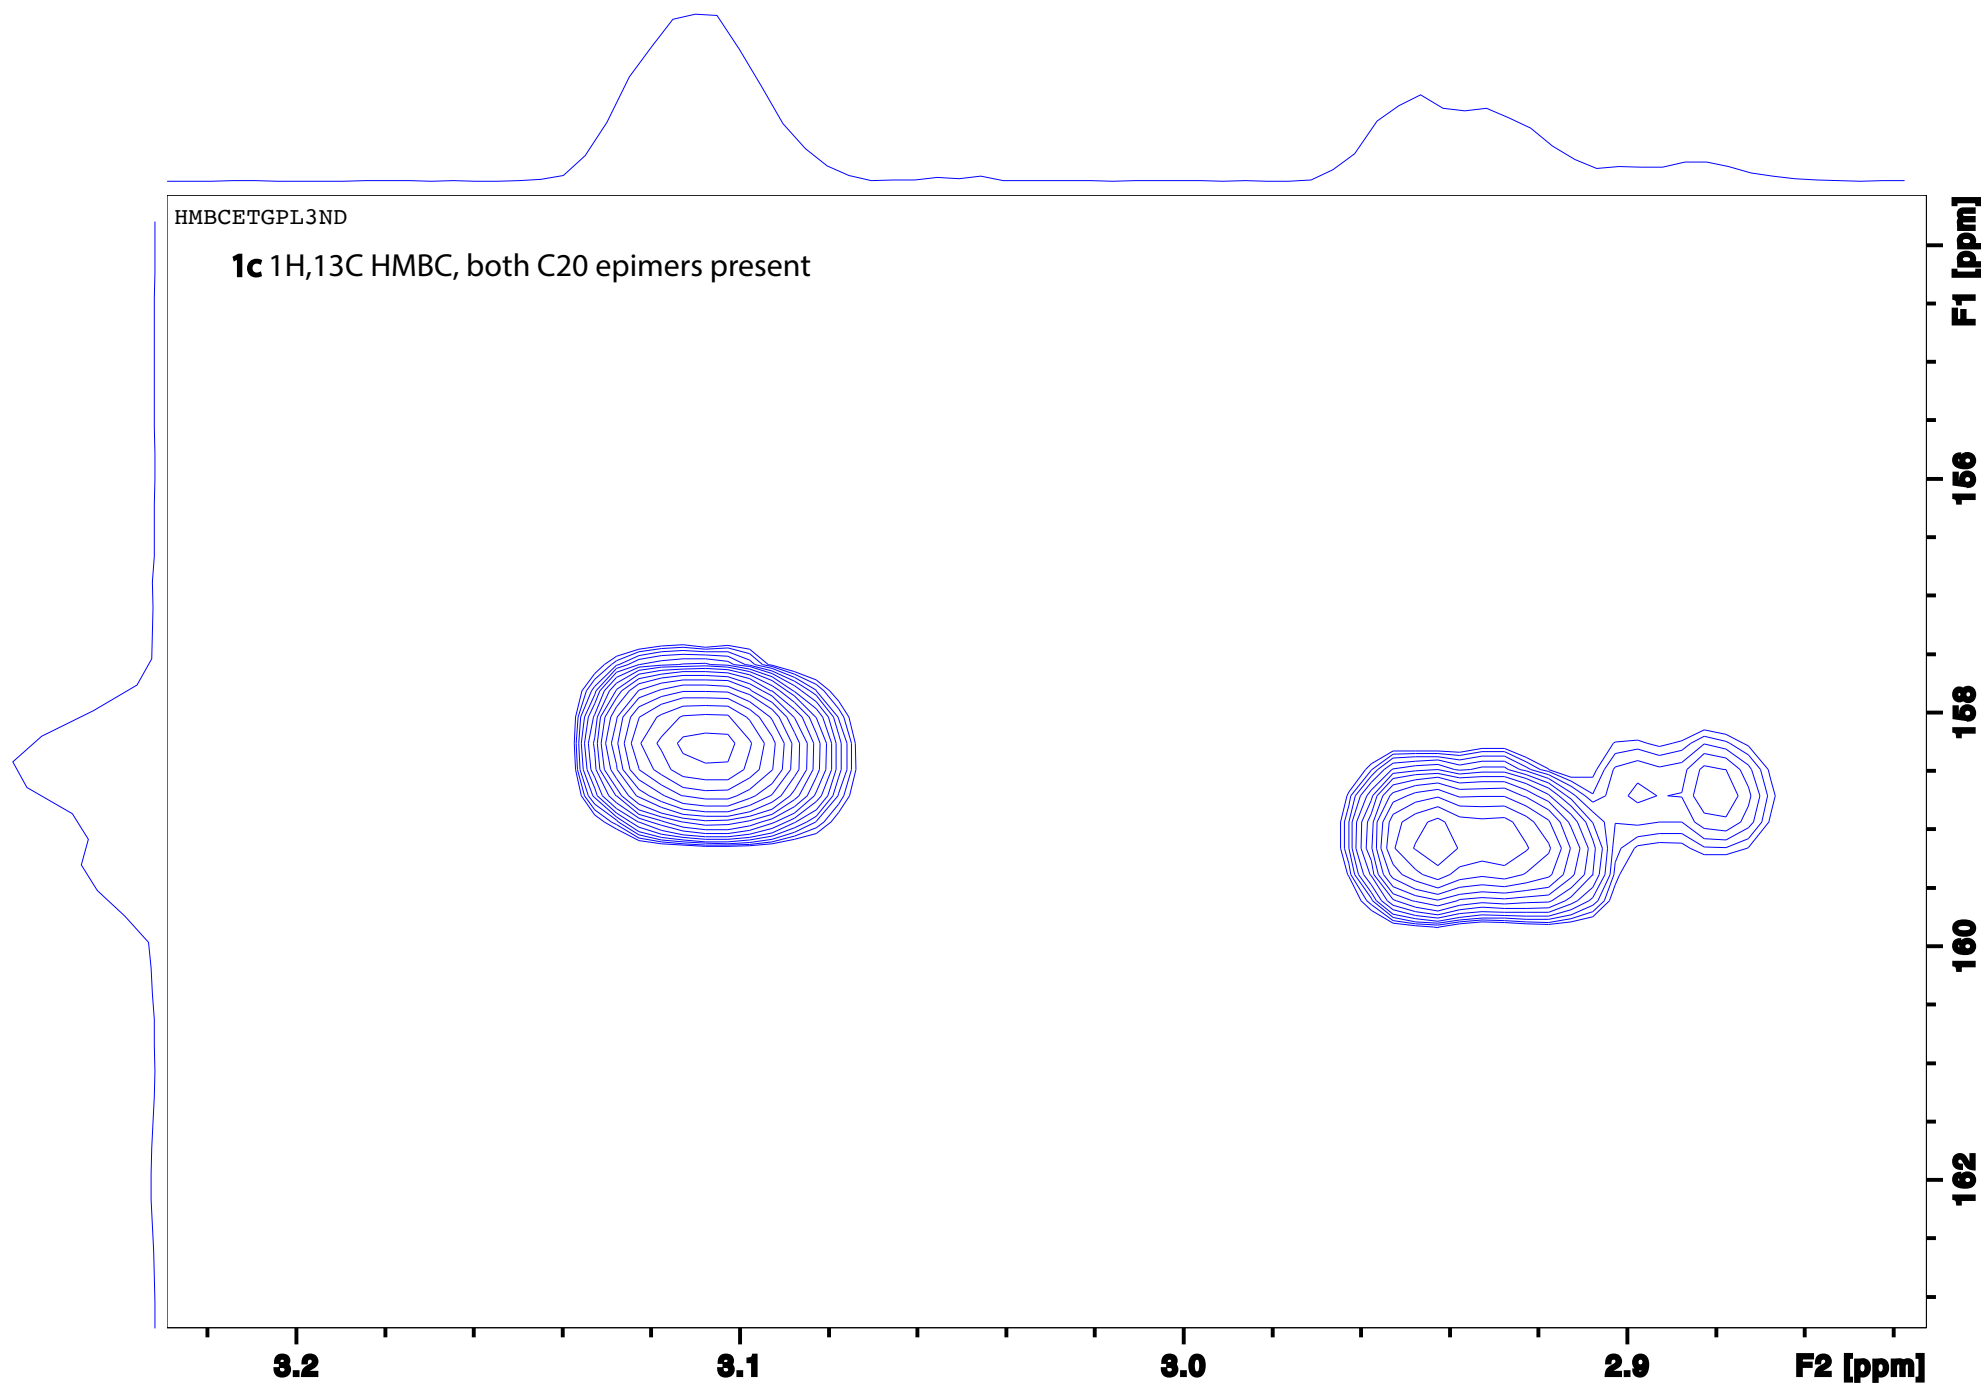

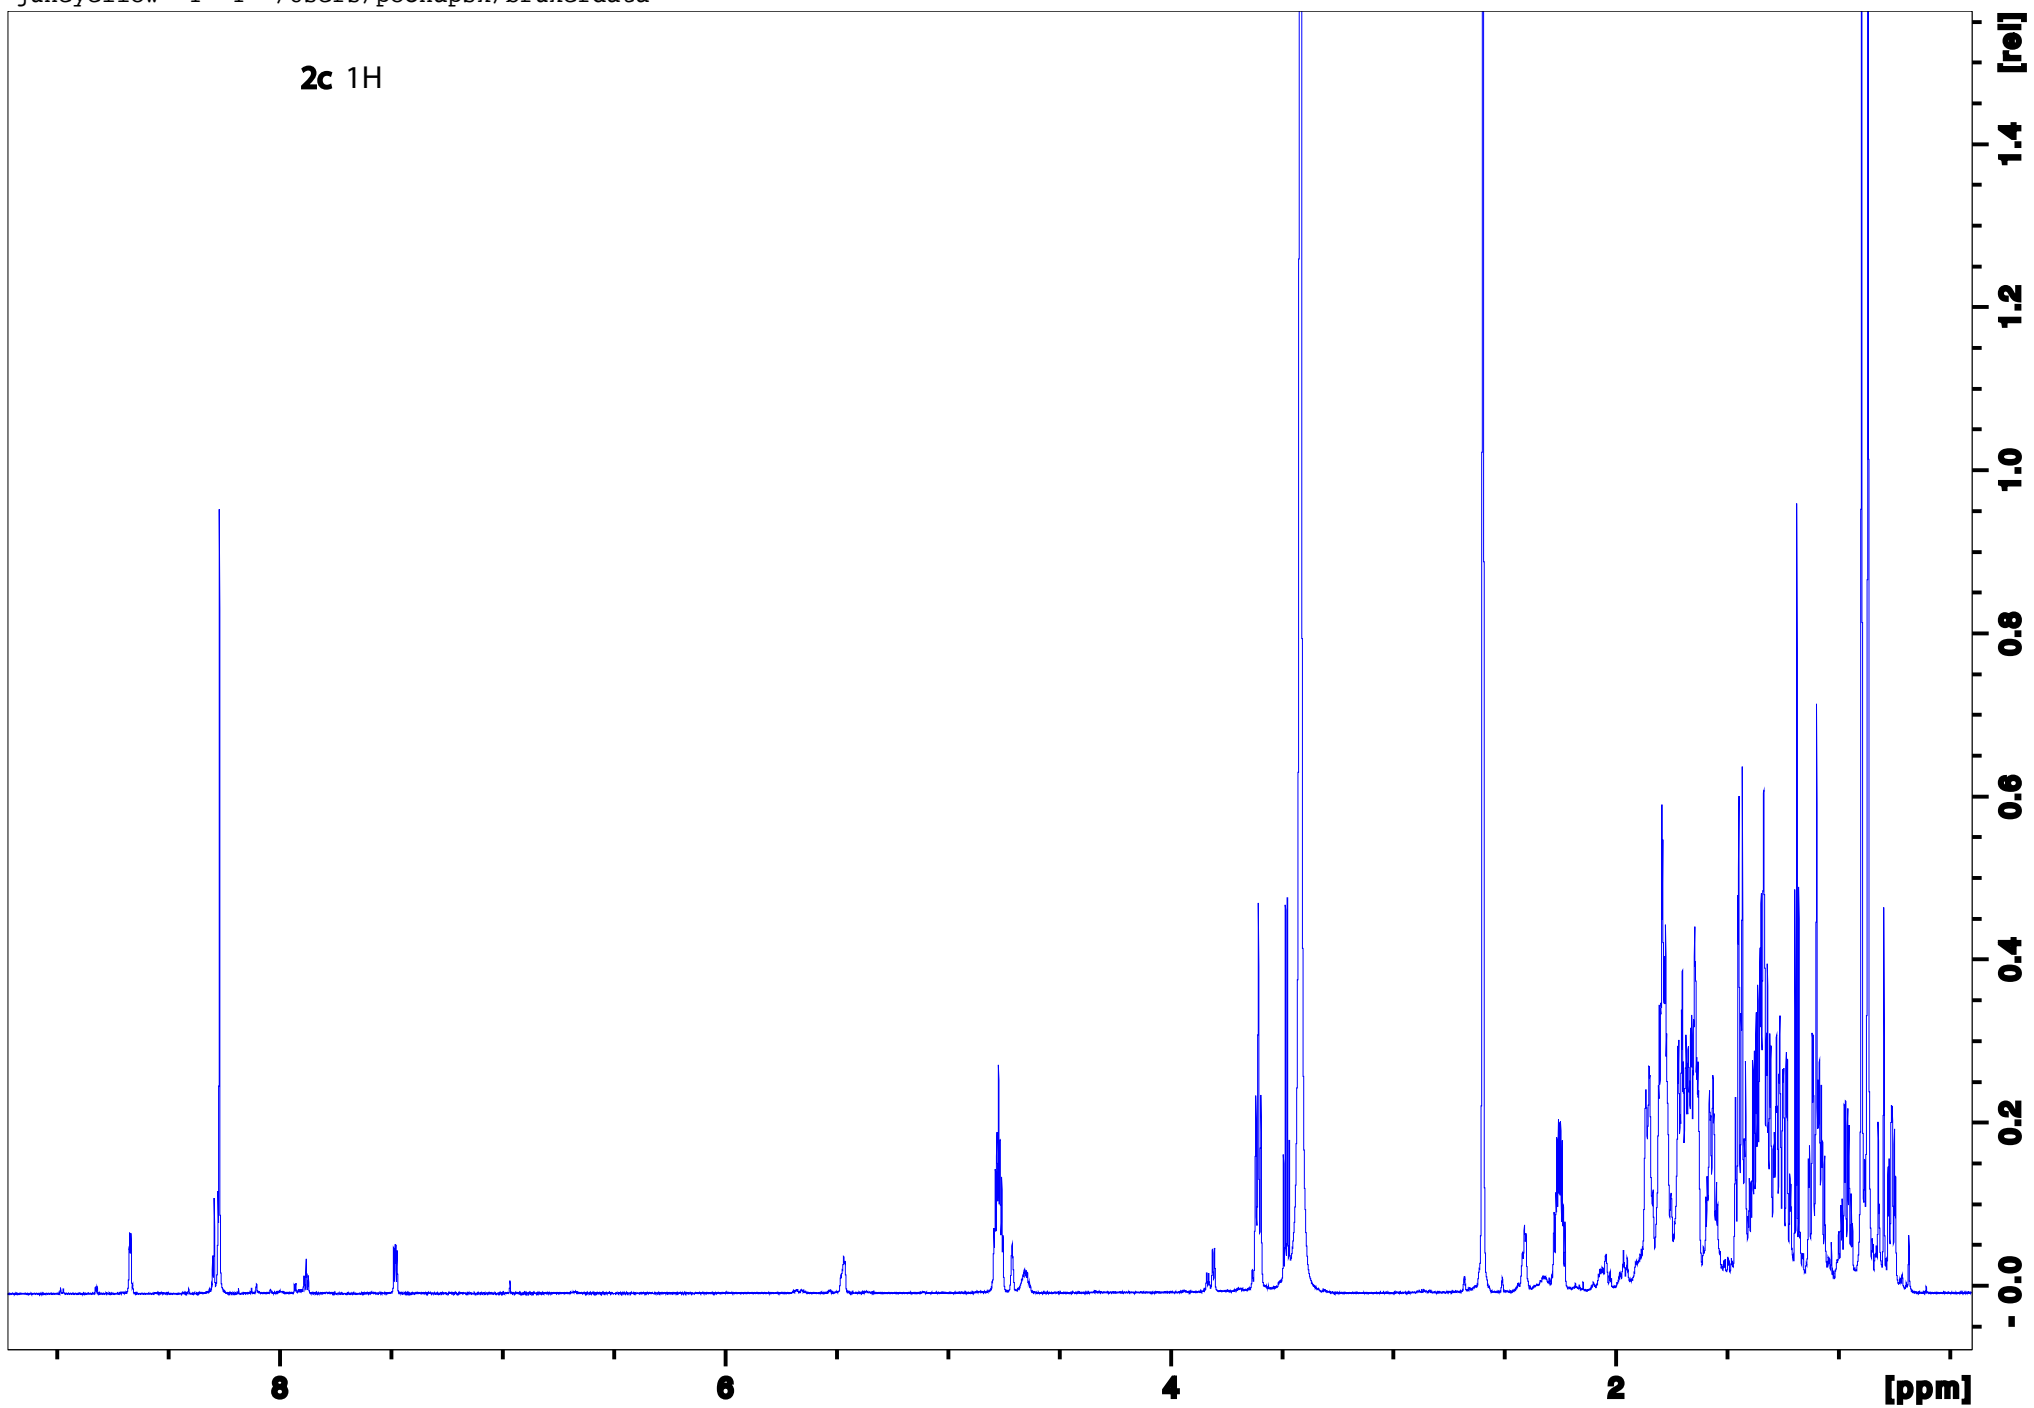

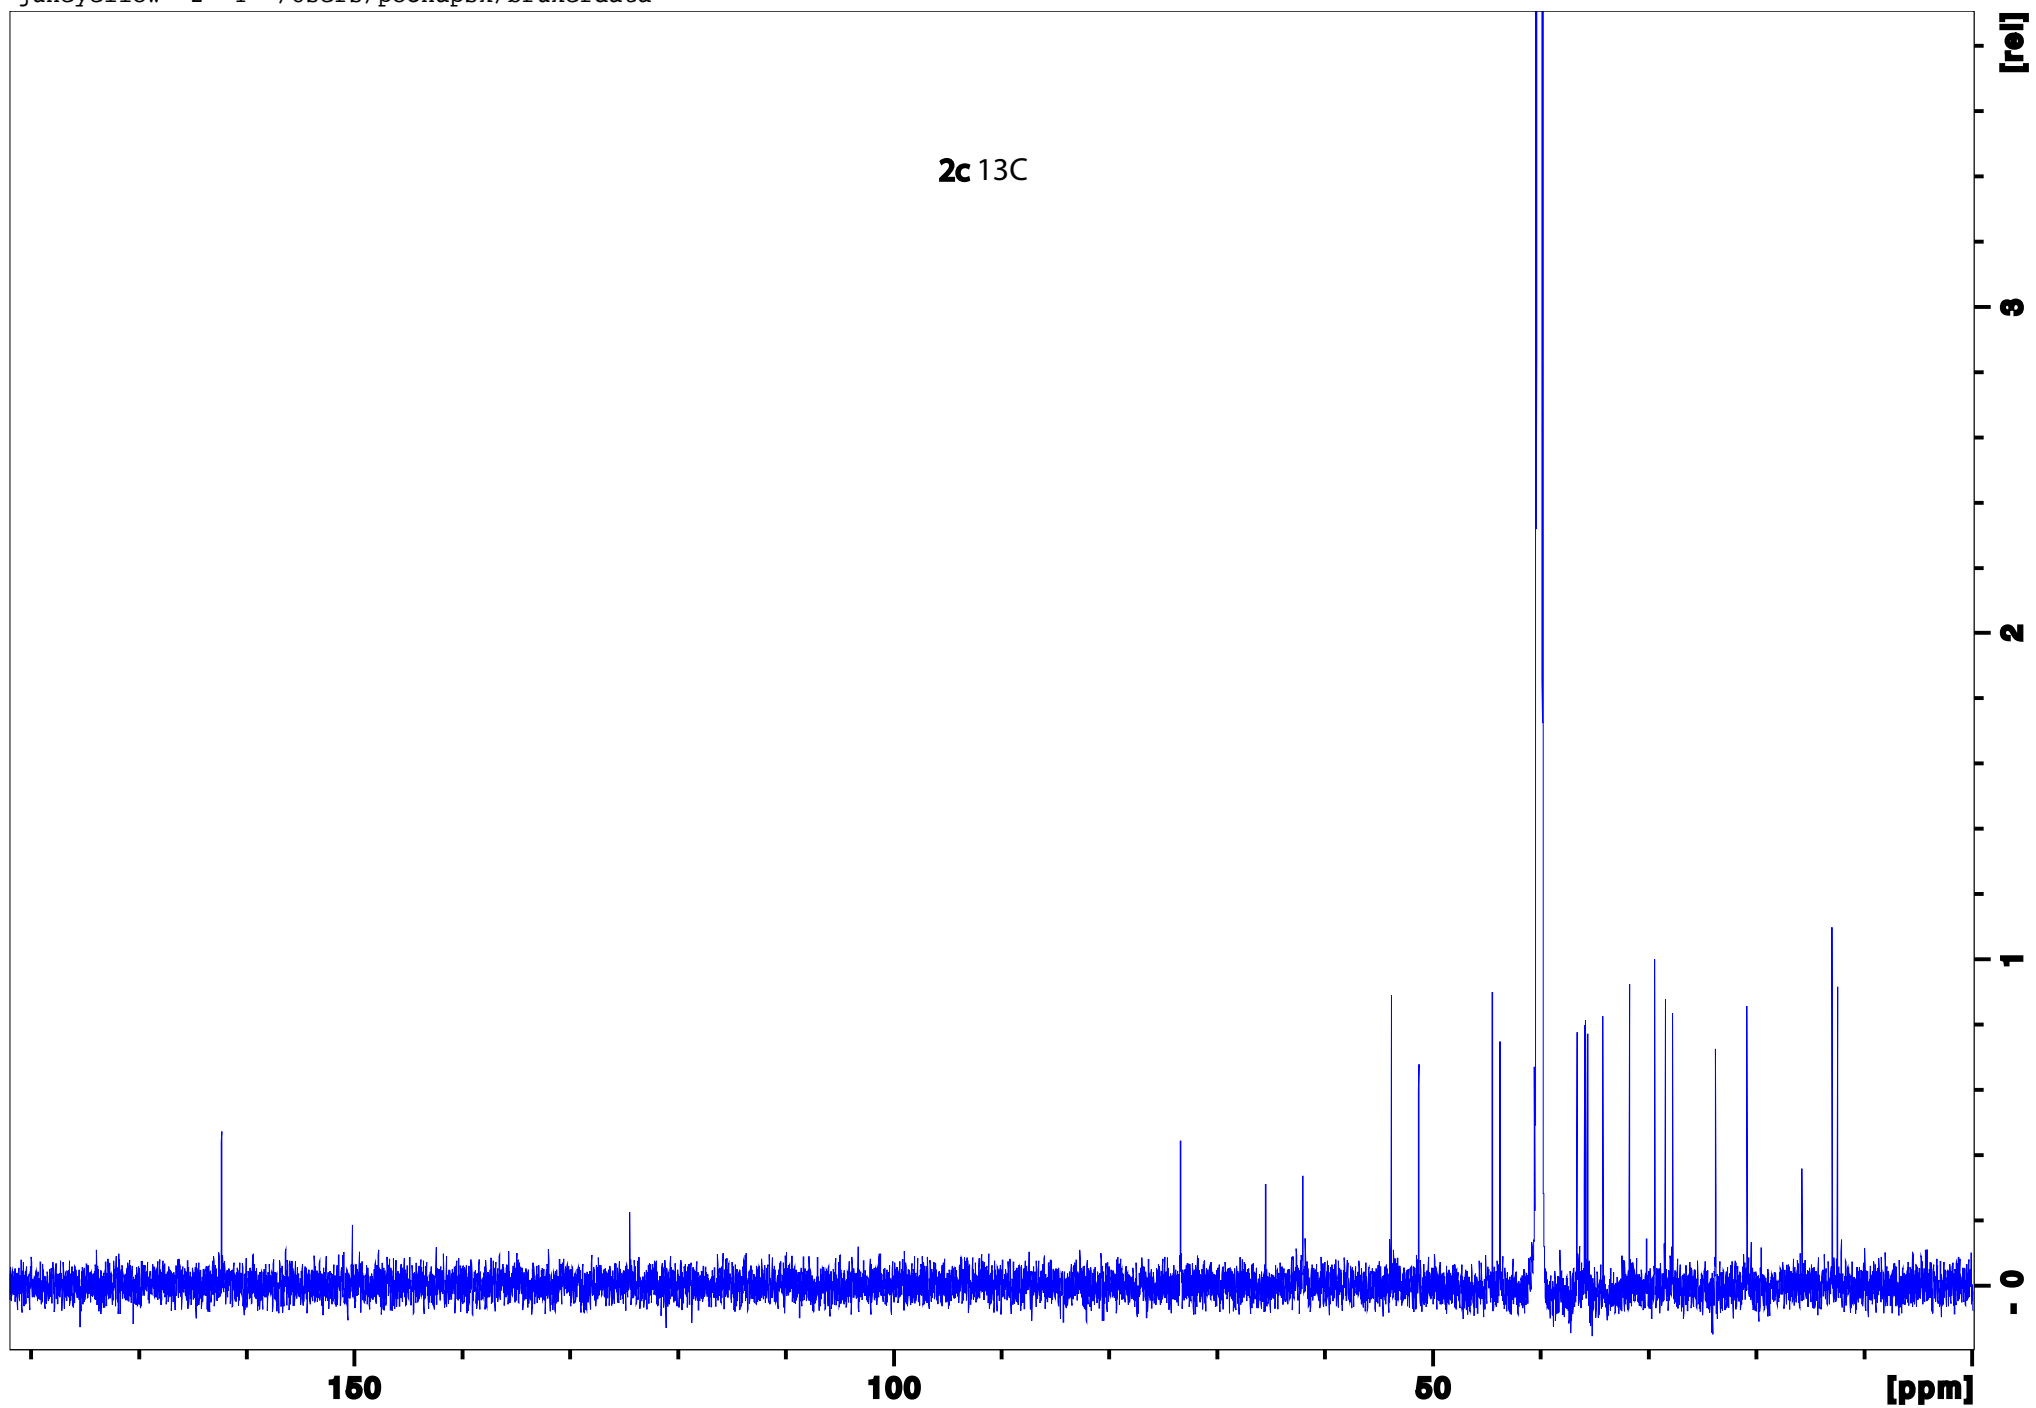



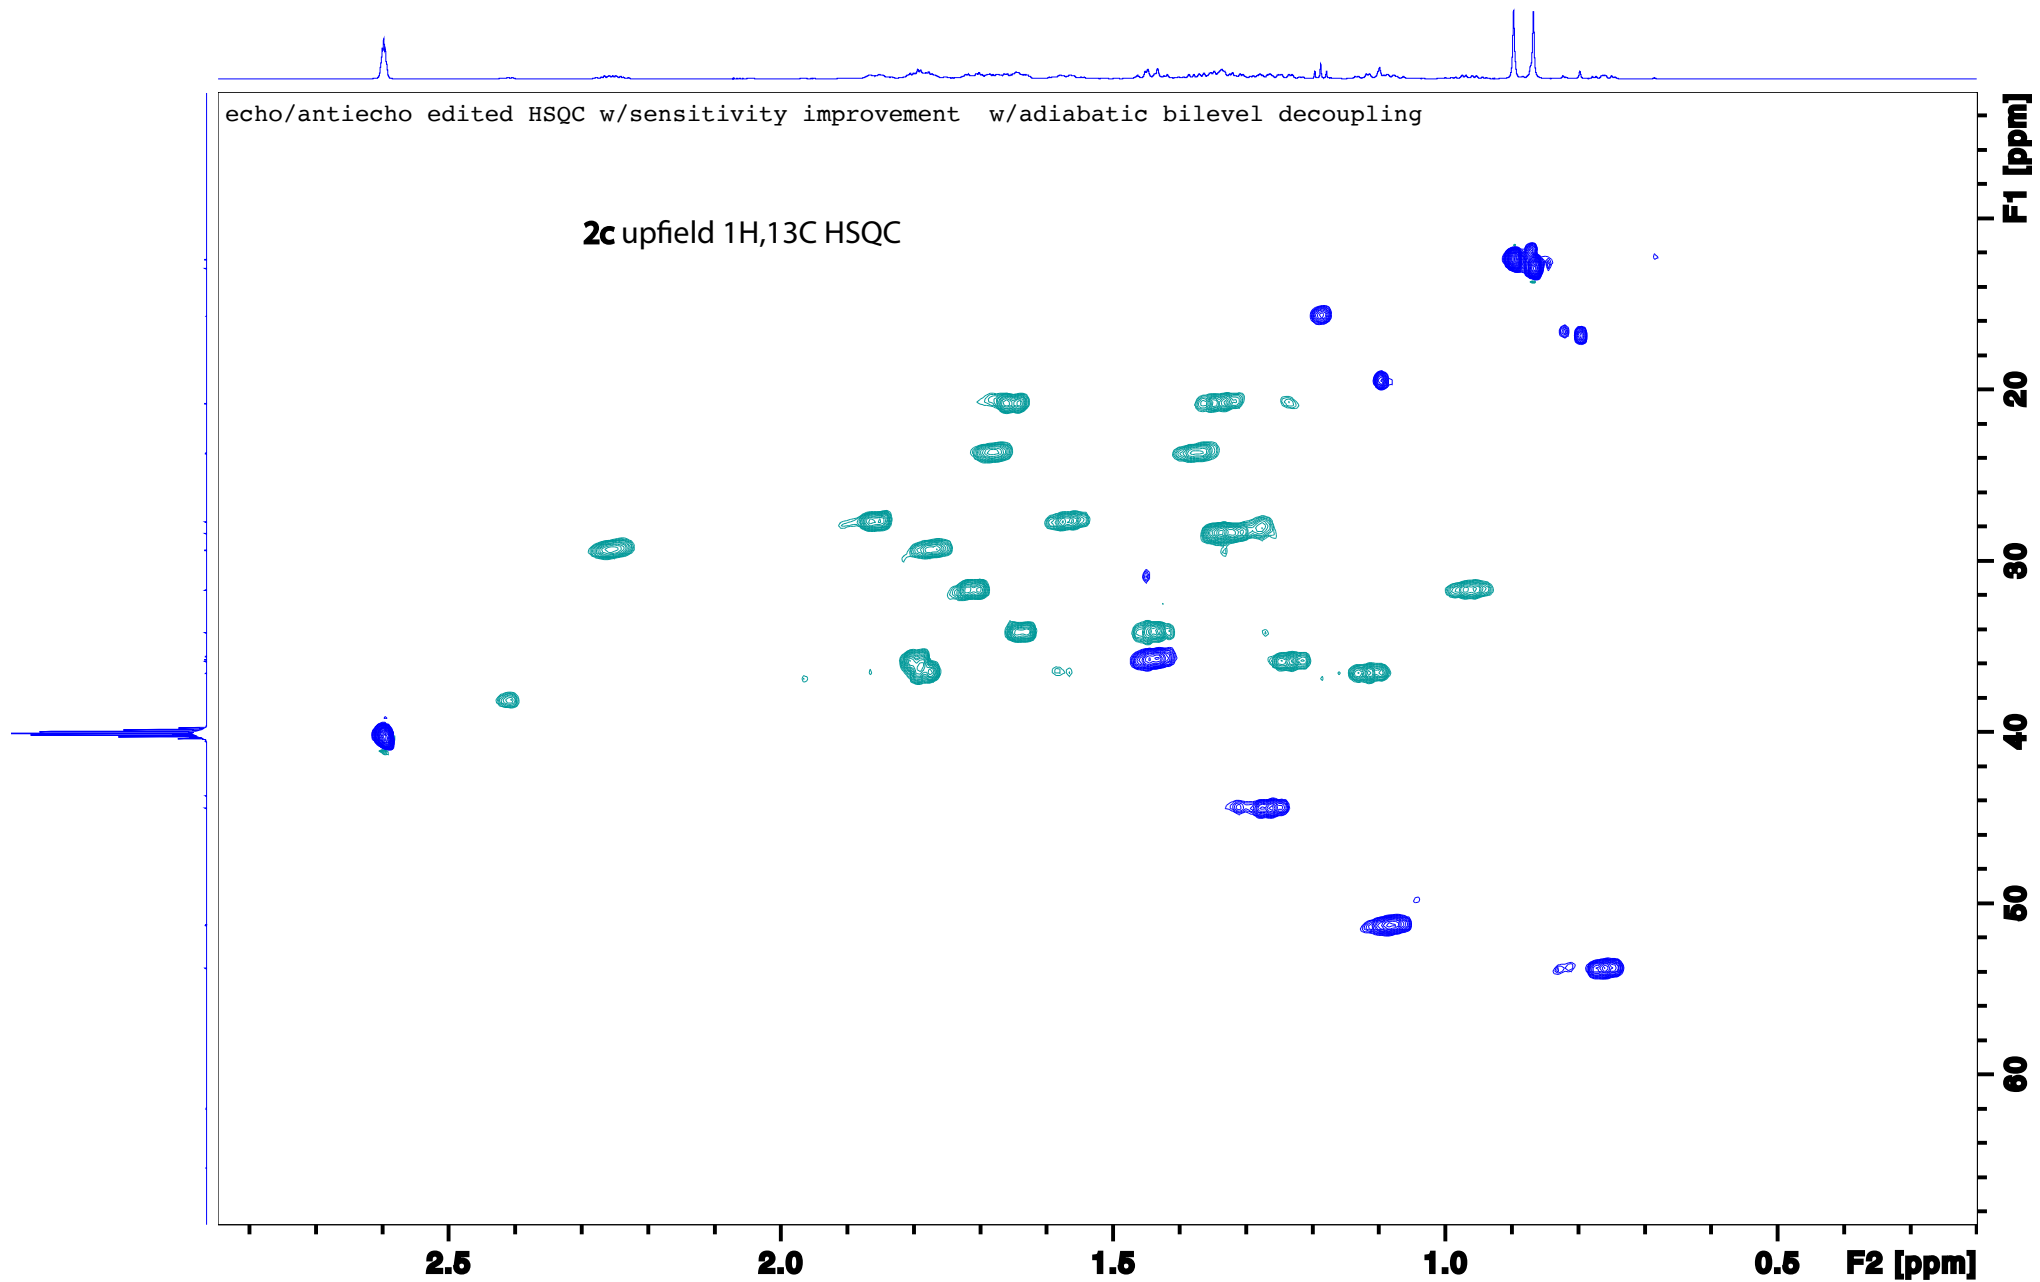

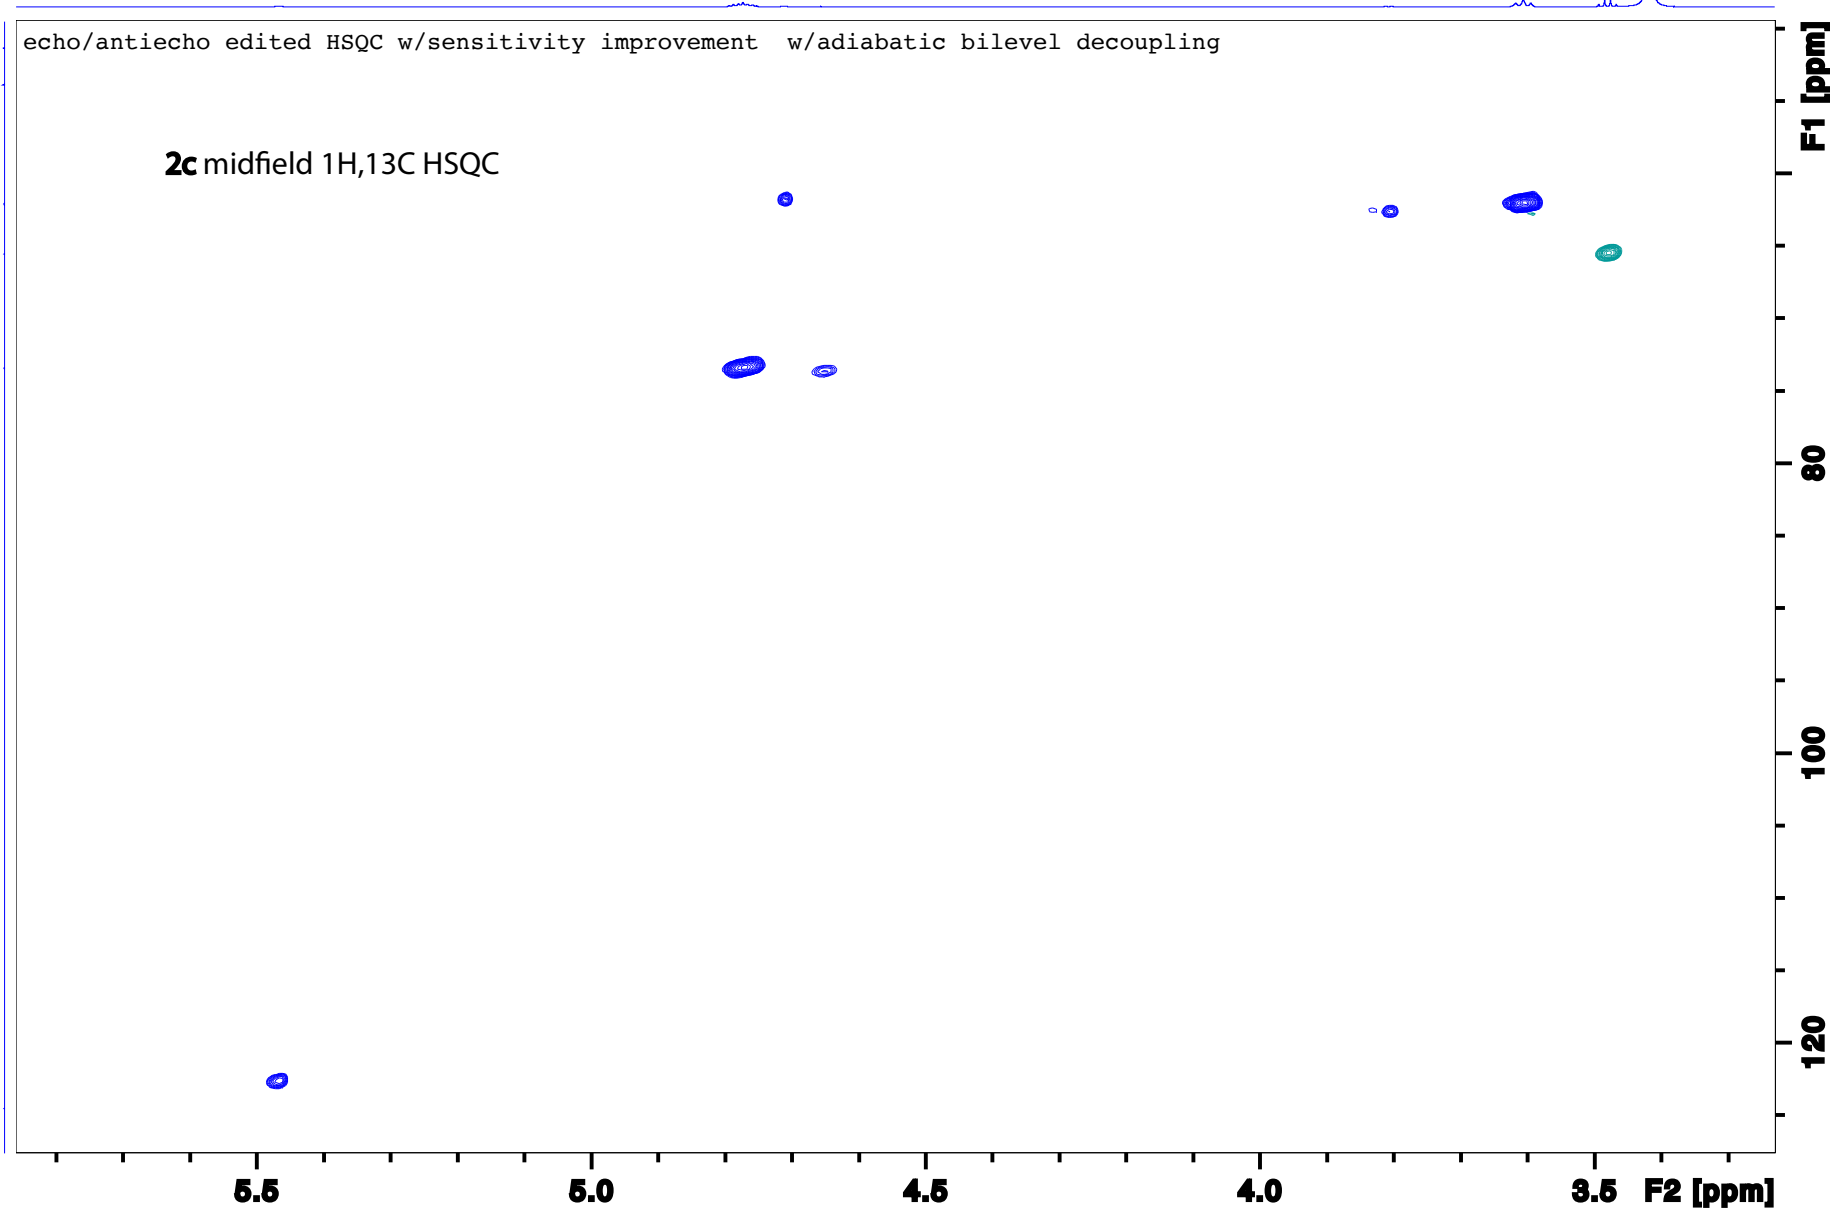

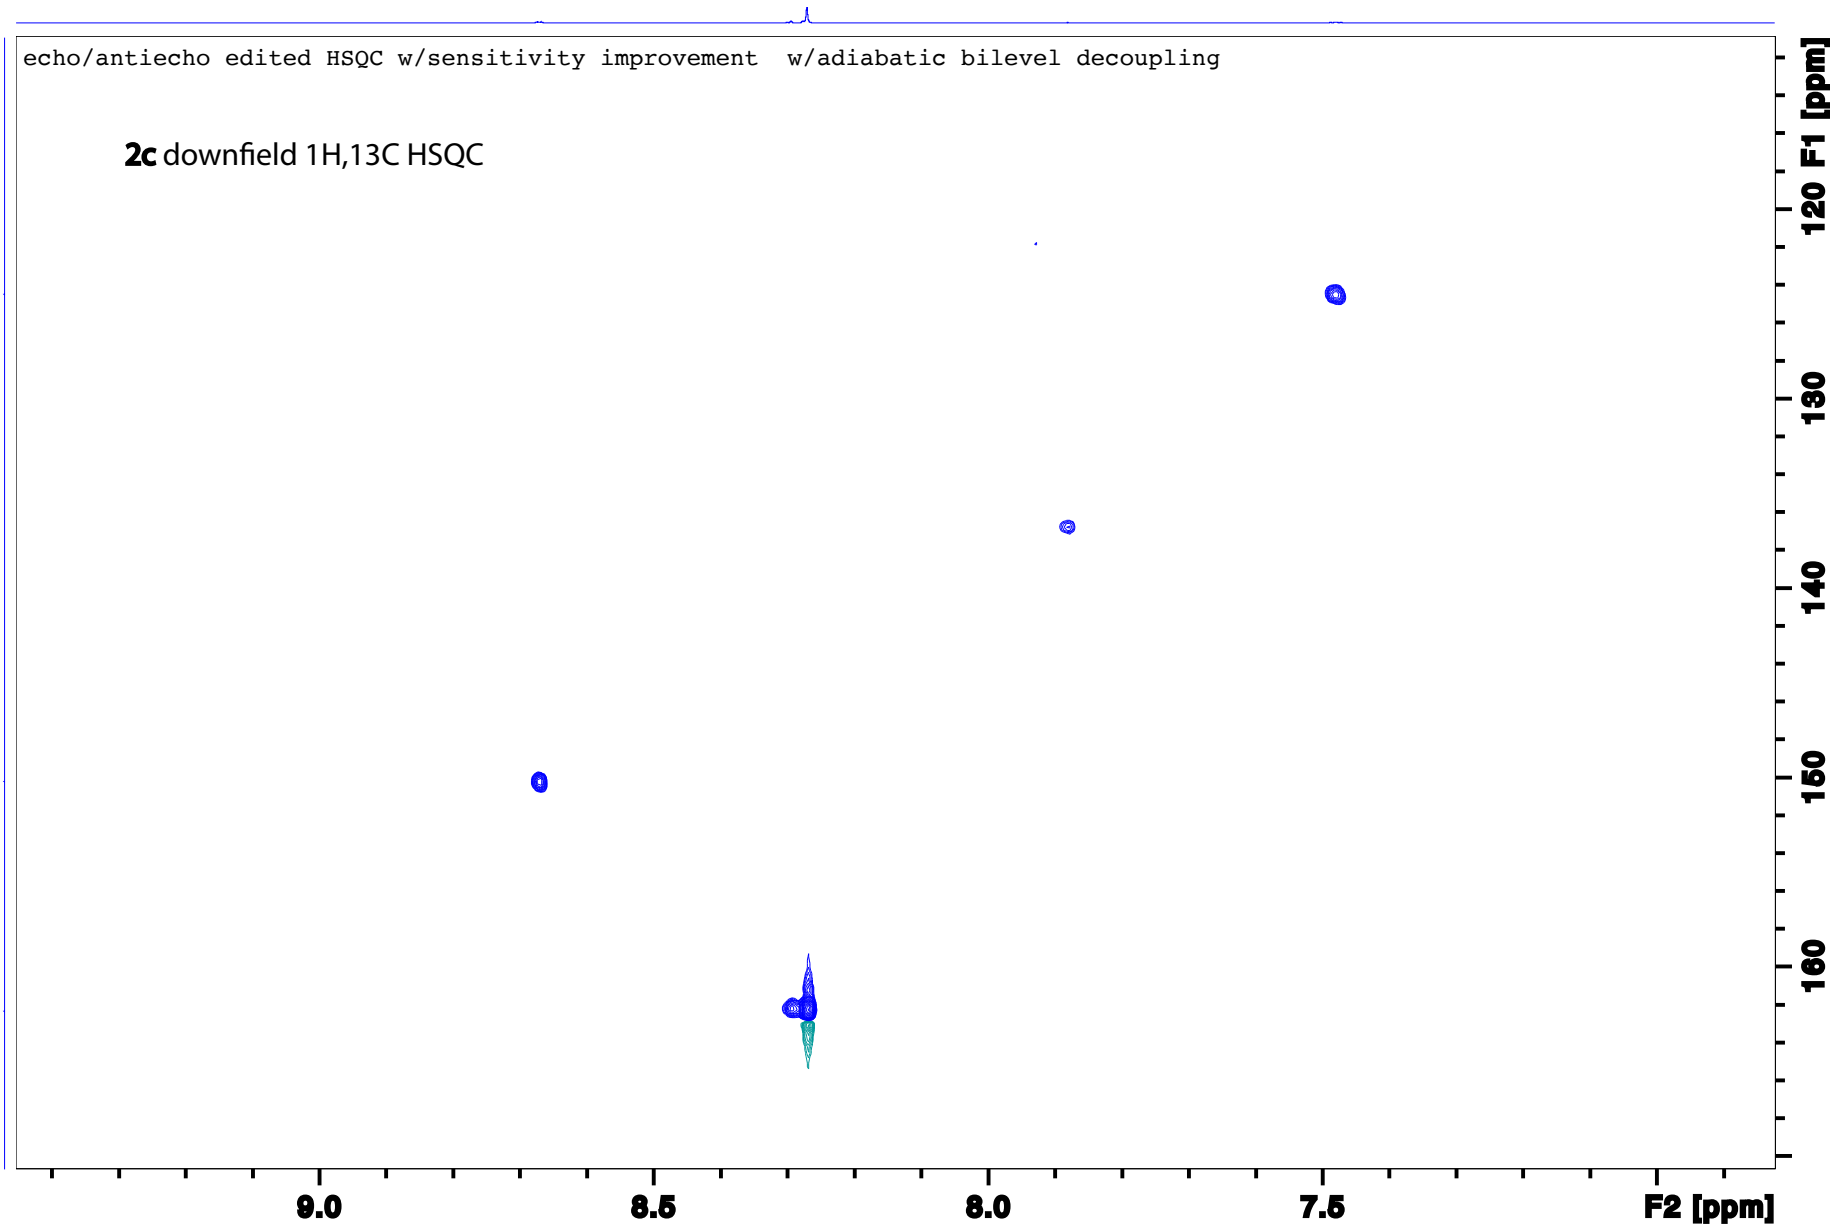

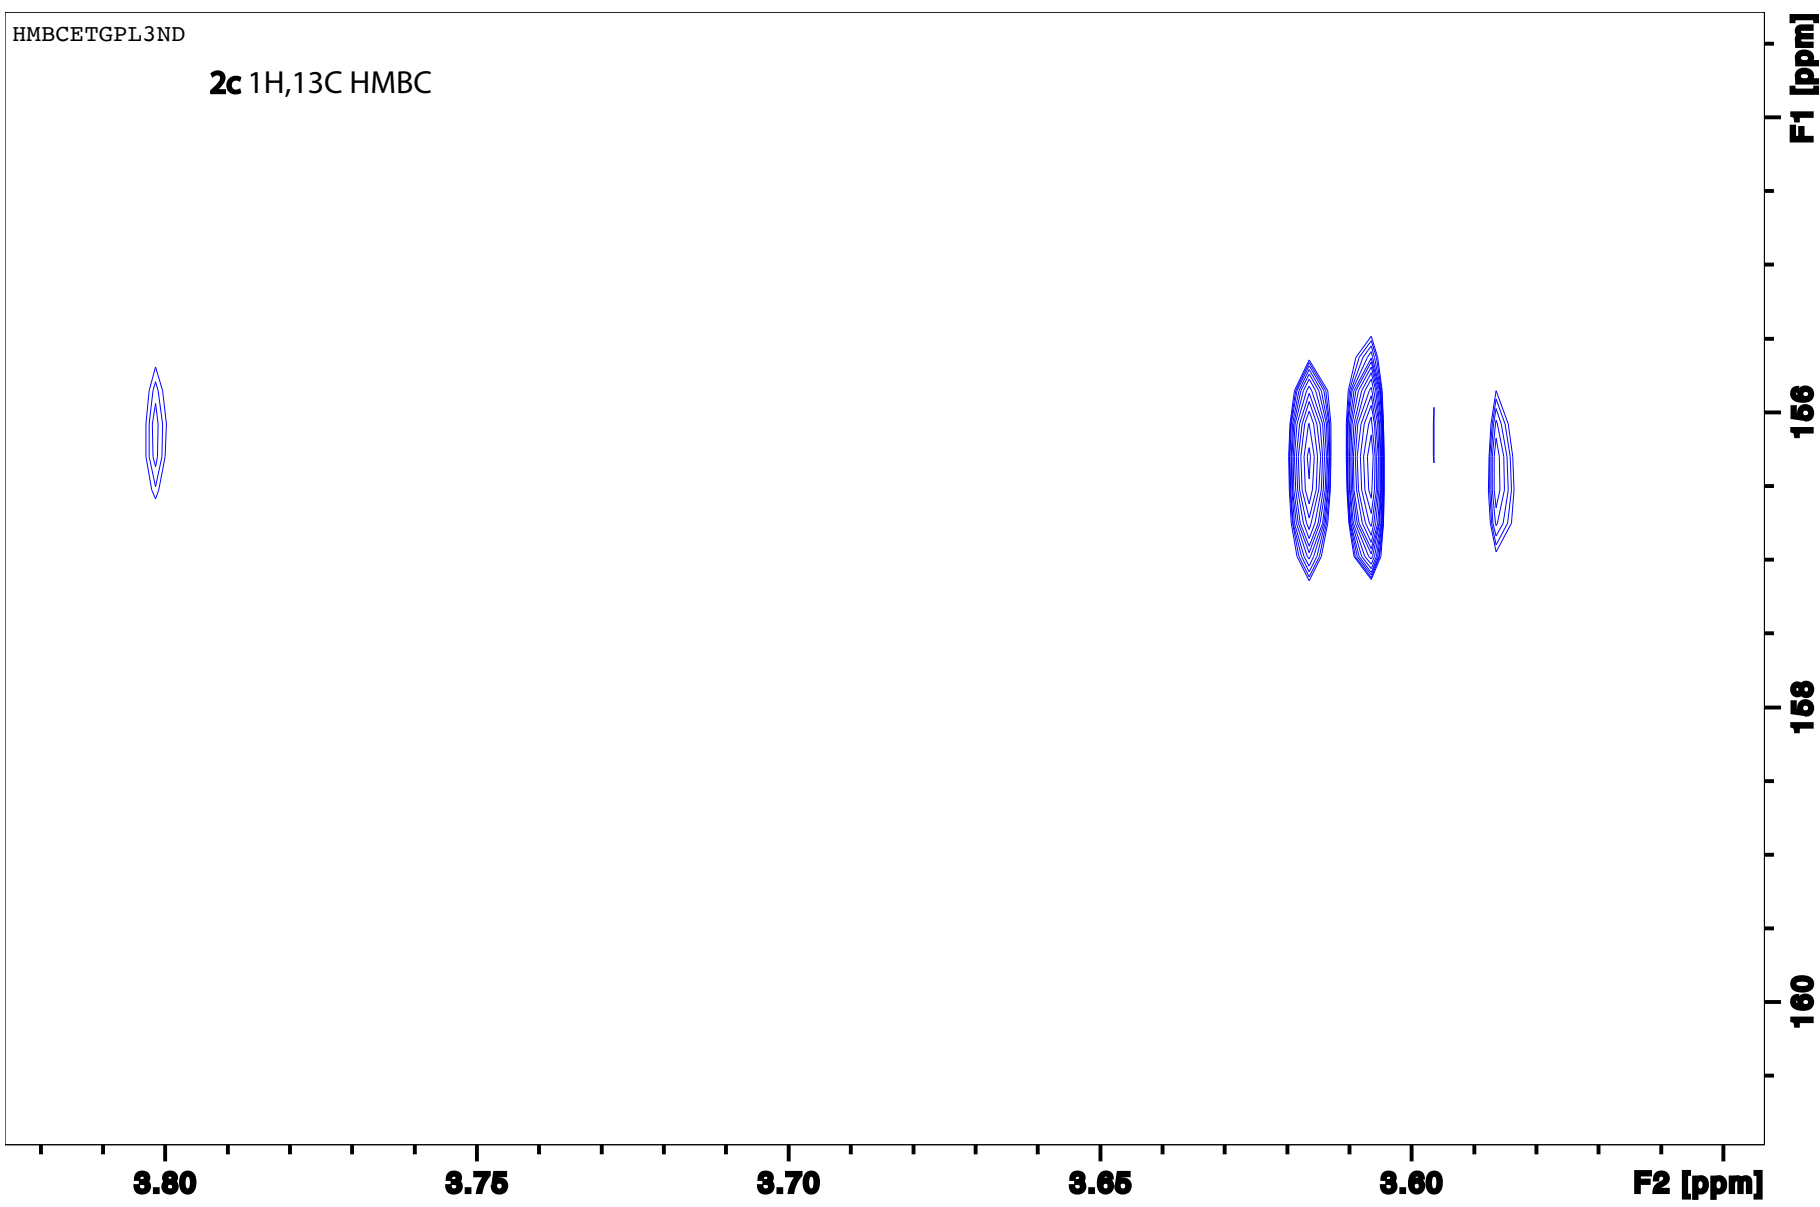

juneyellow 10 1 /Users/pochapsk/brukerdata

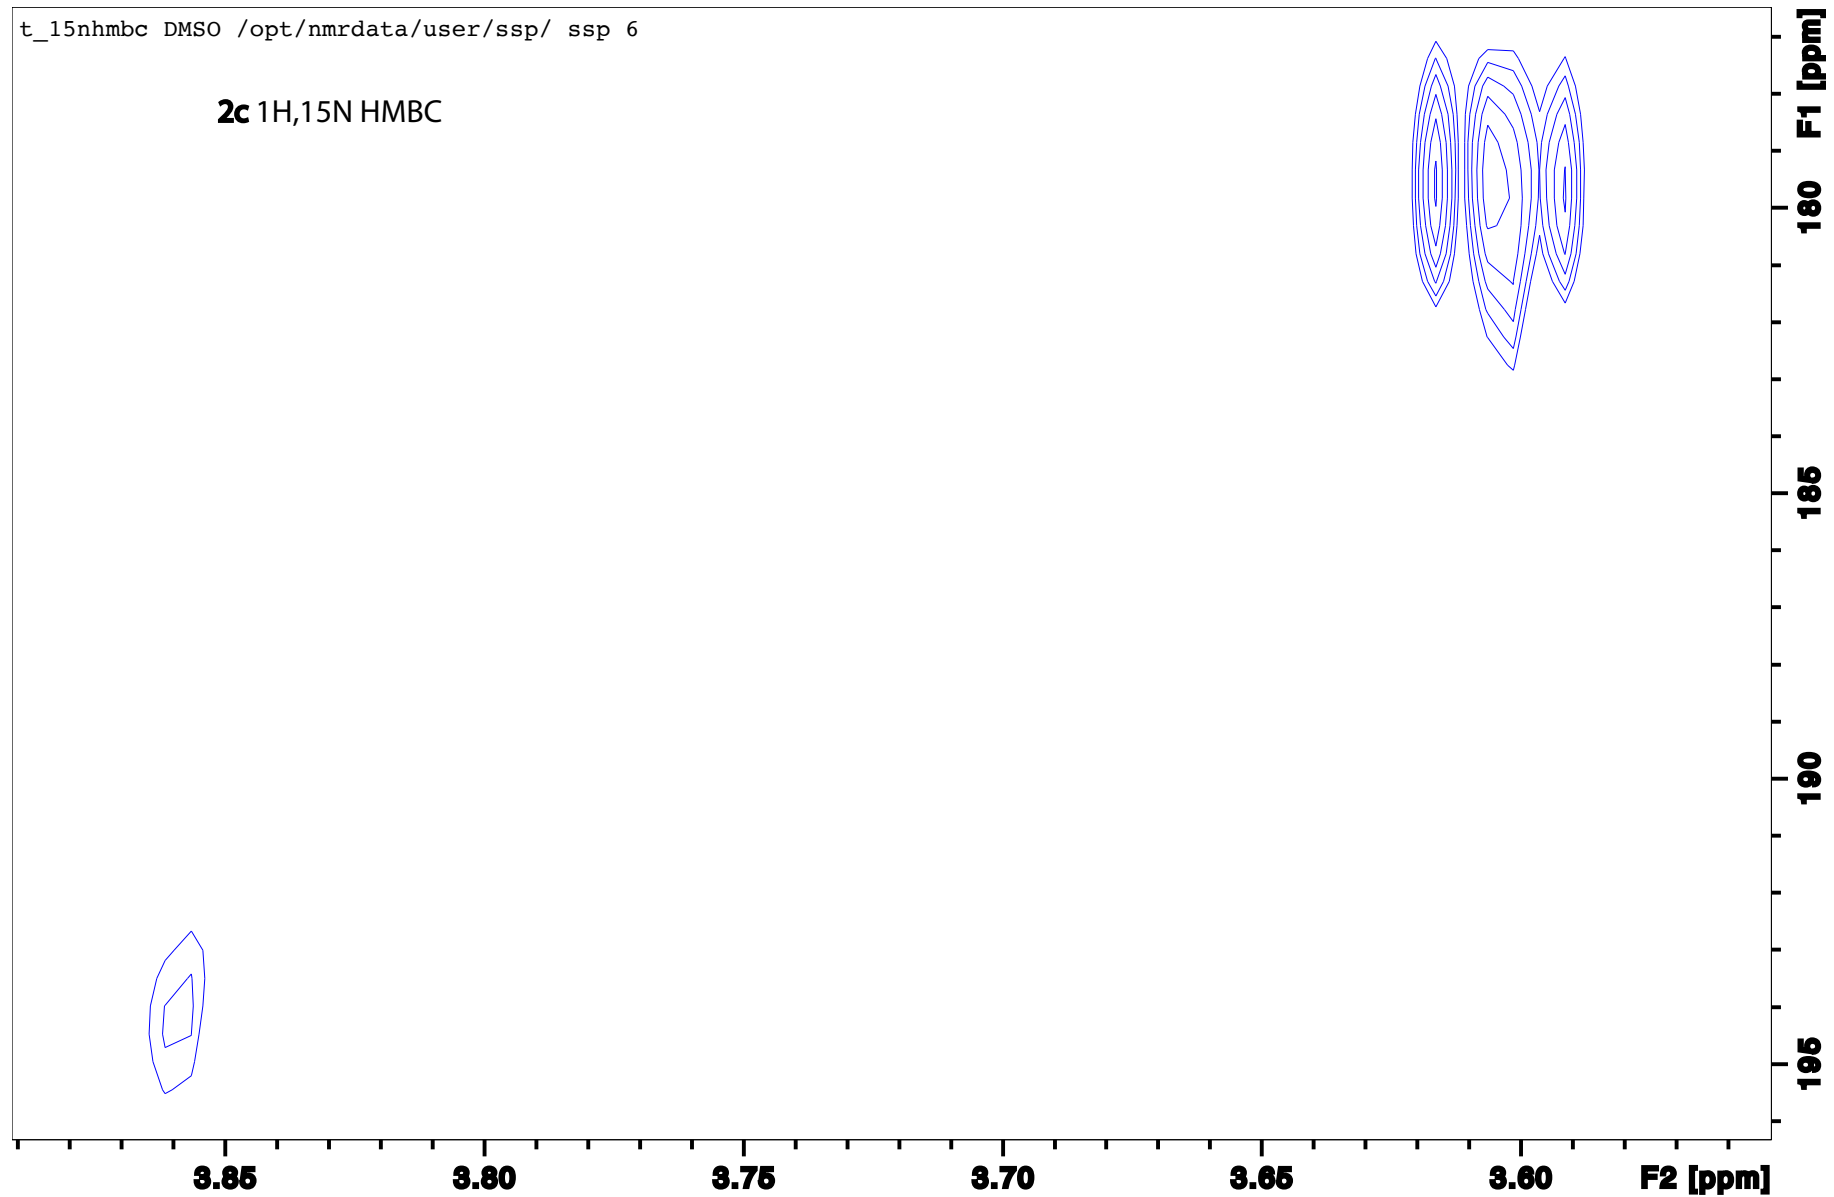

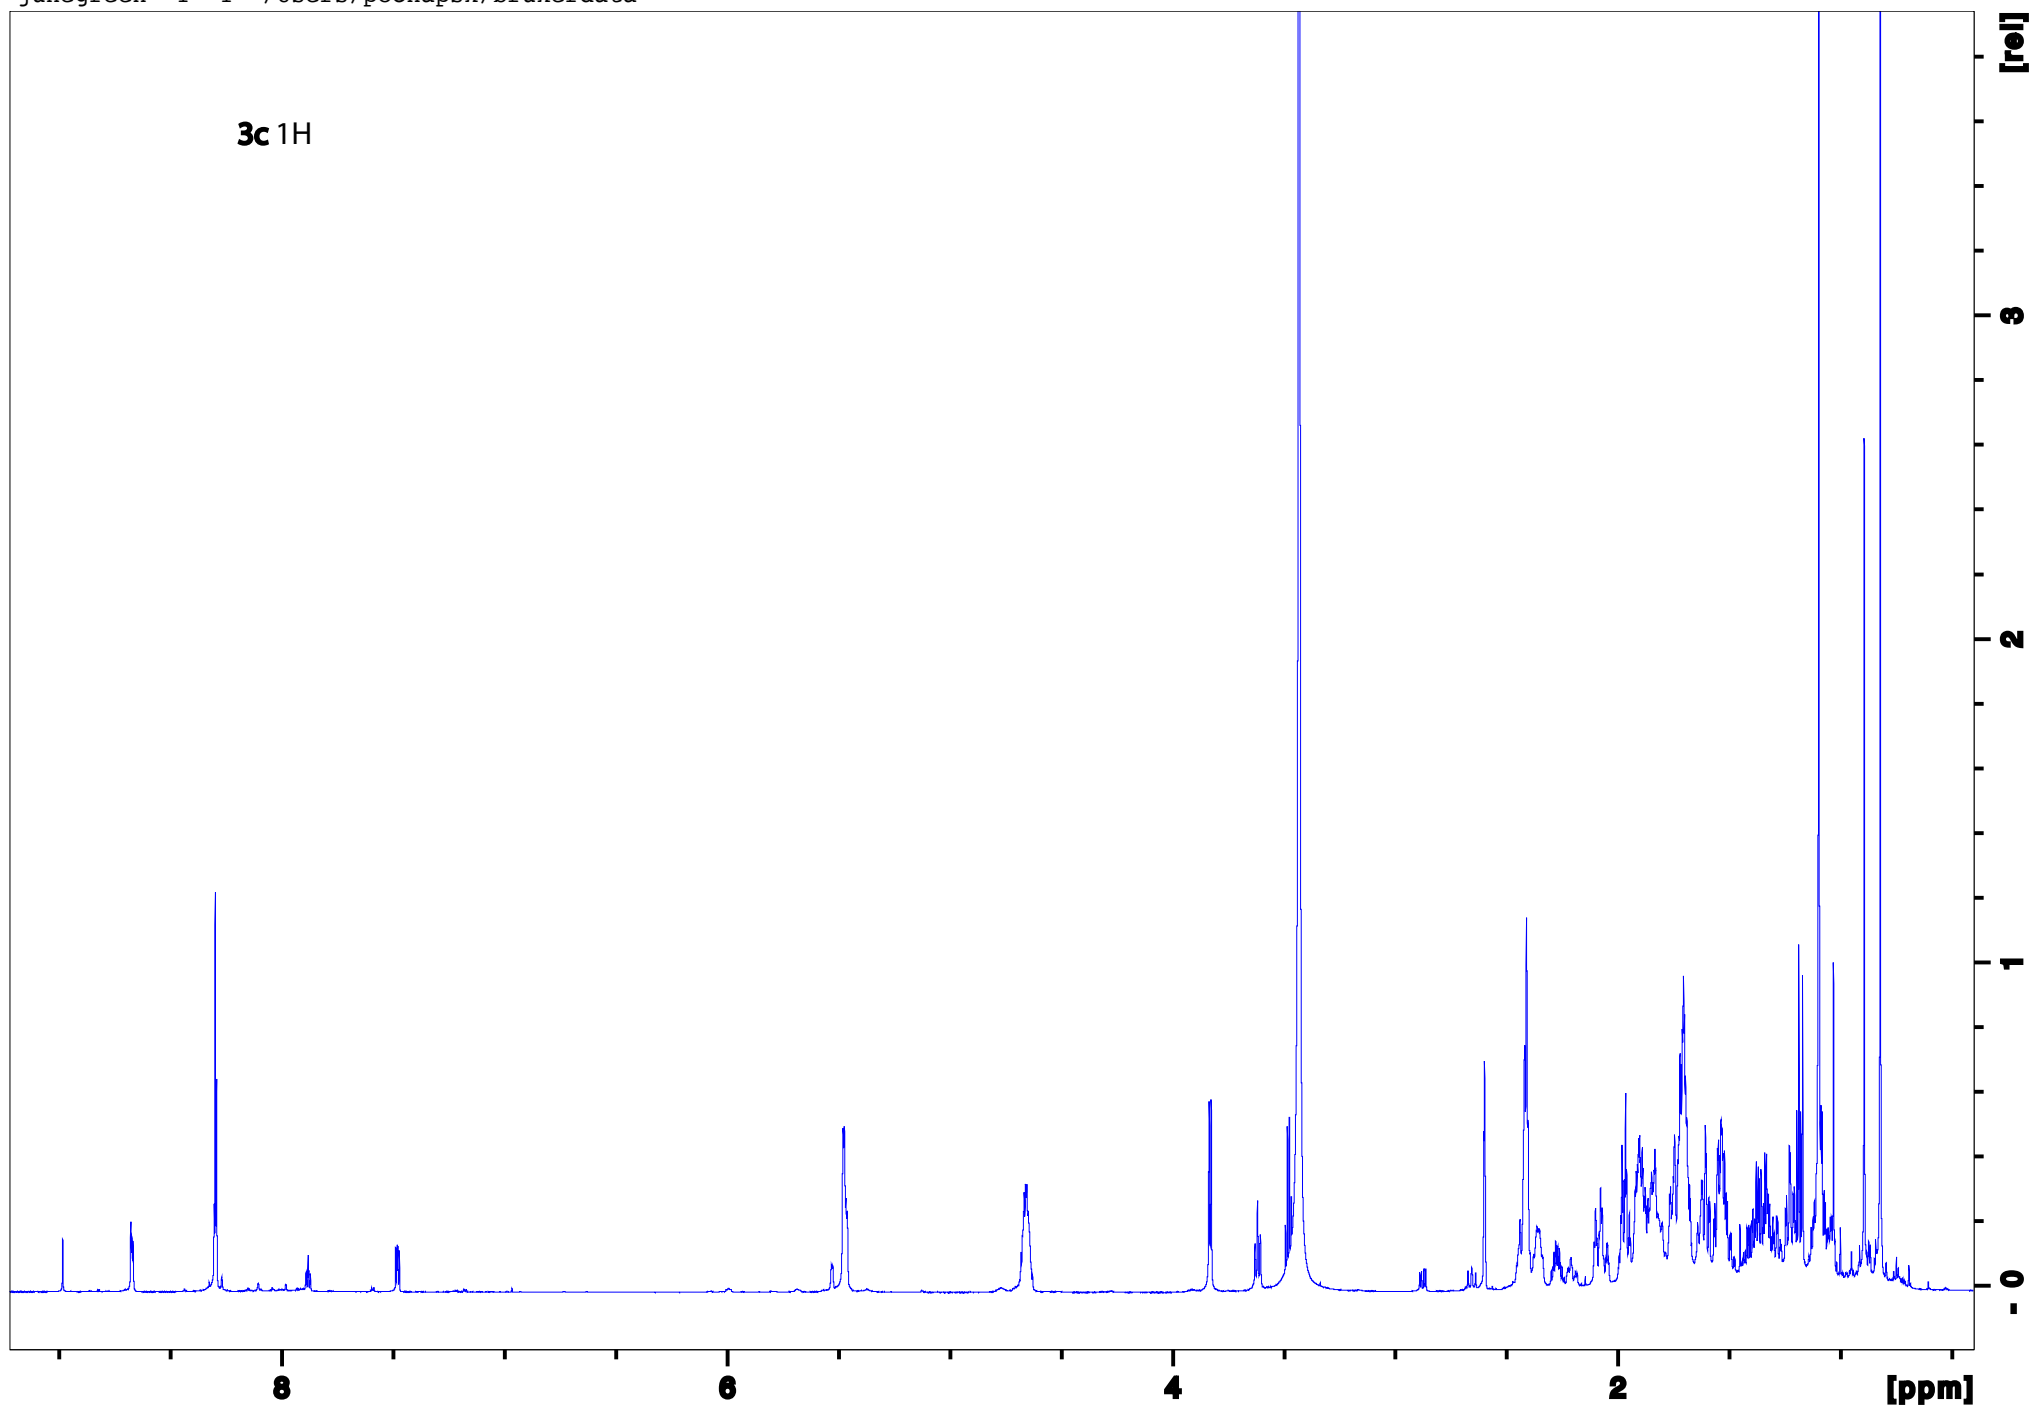

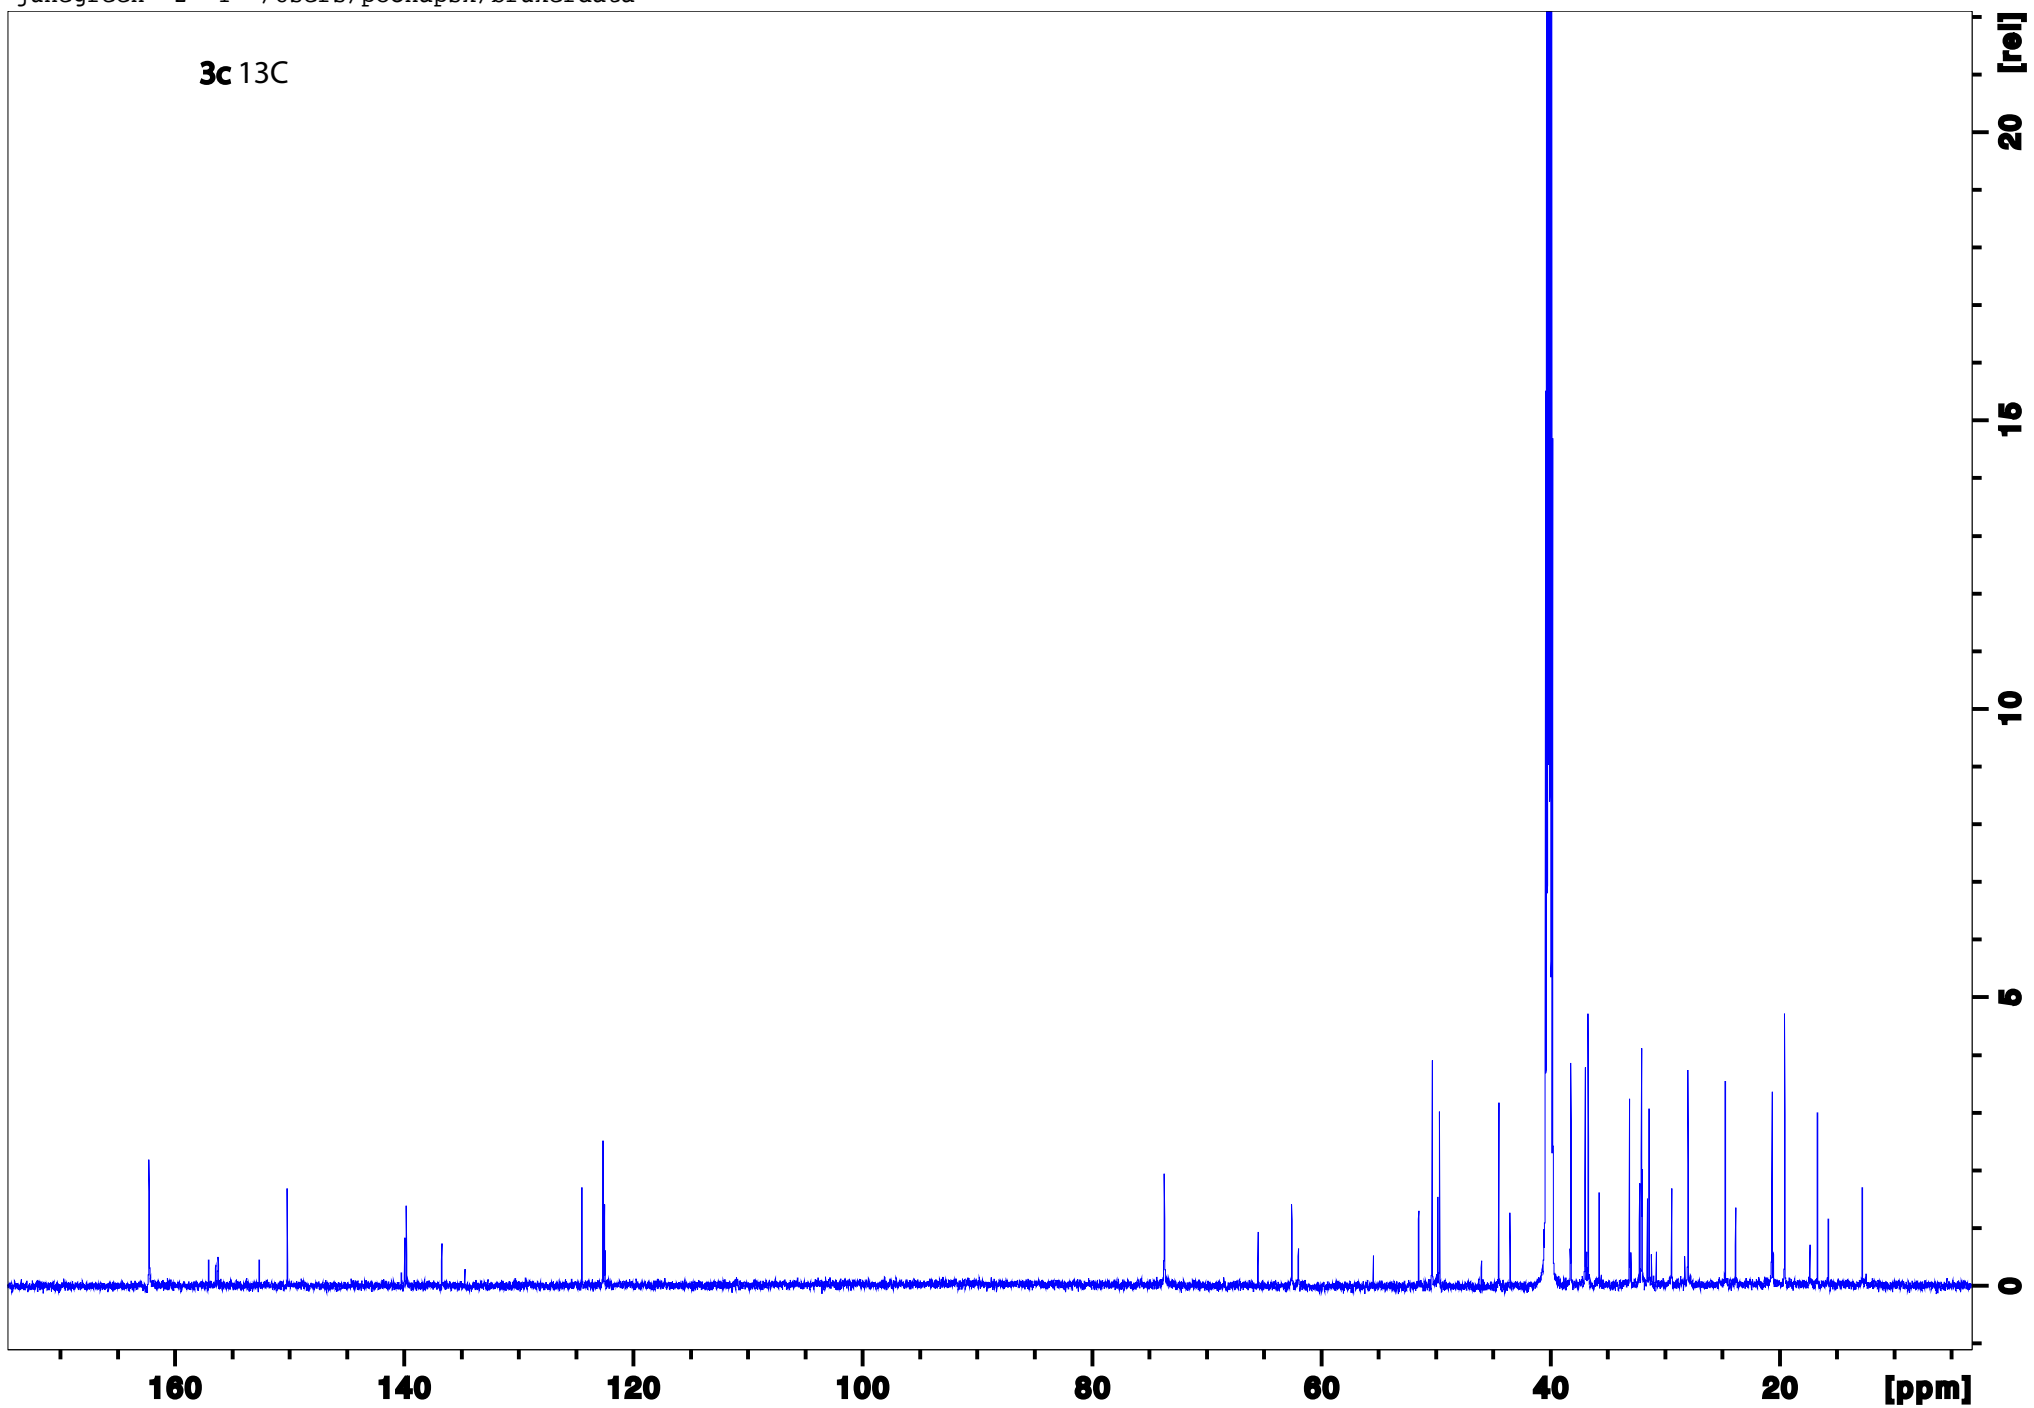

junegreen 4 1 /Users/pochapsk/brukerdata

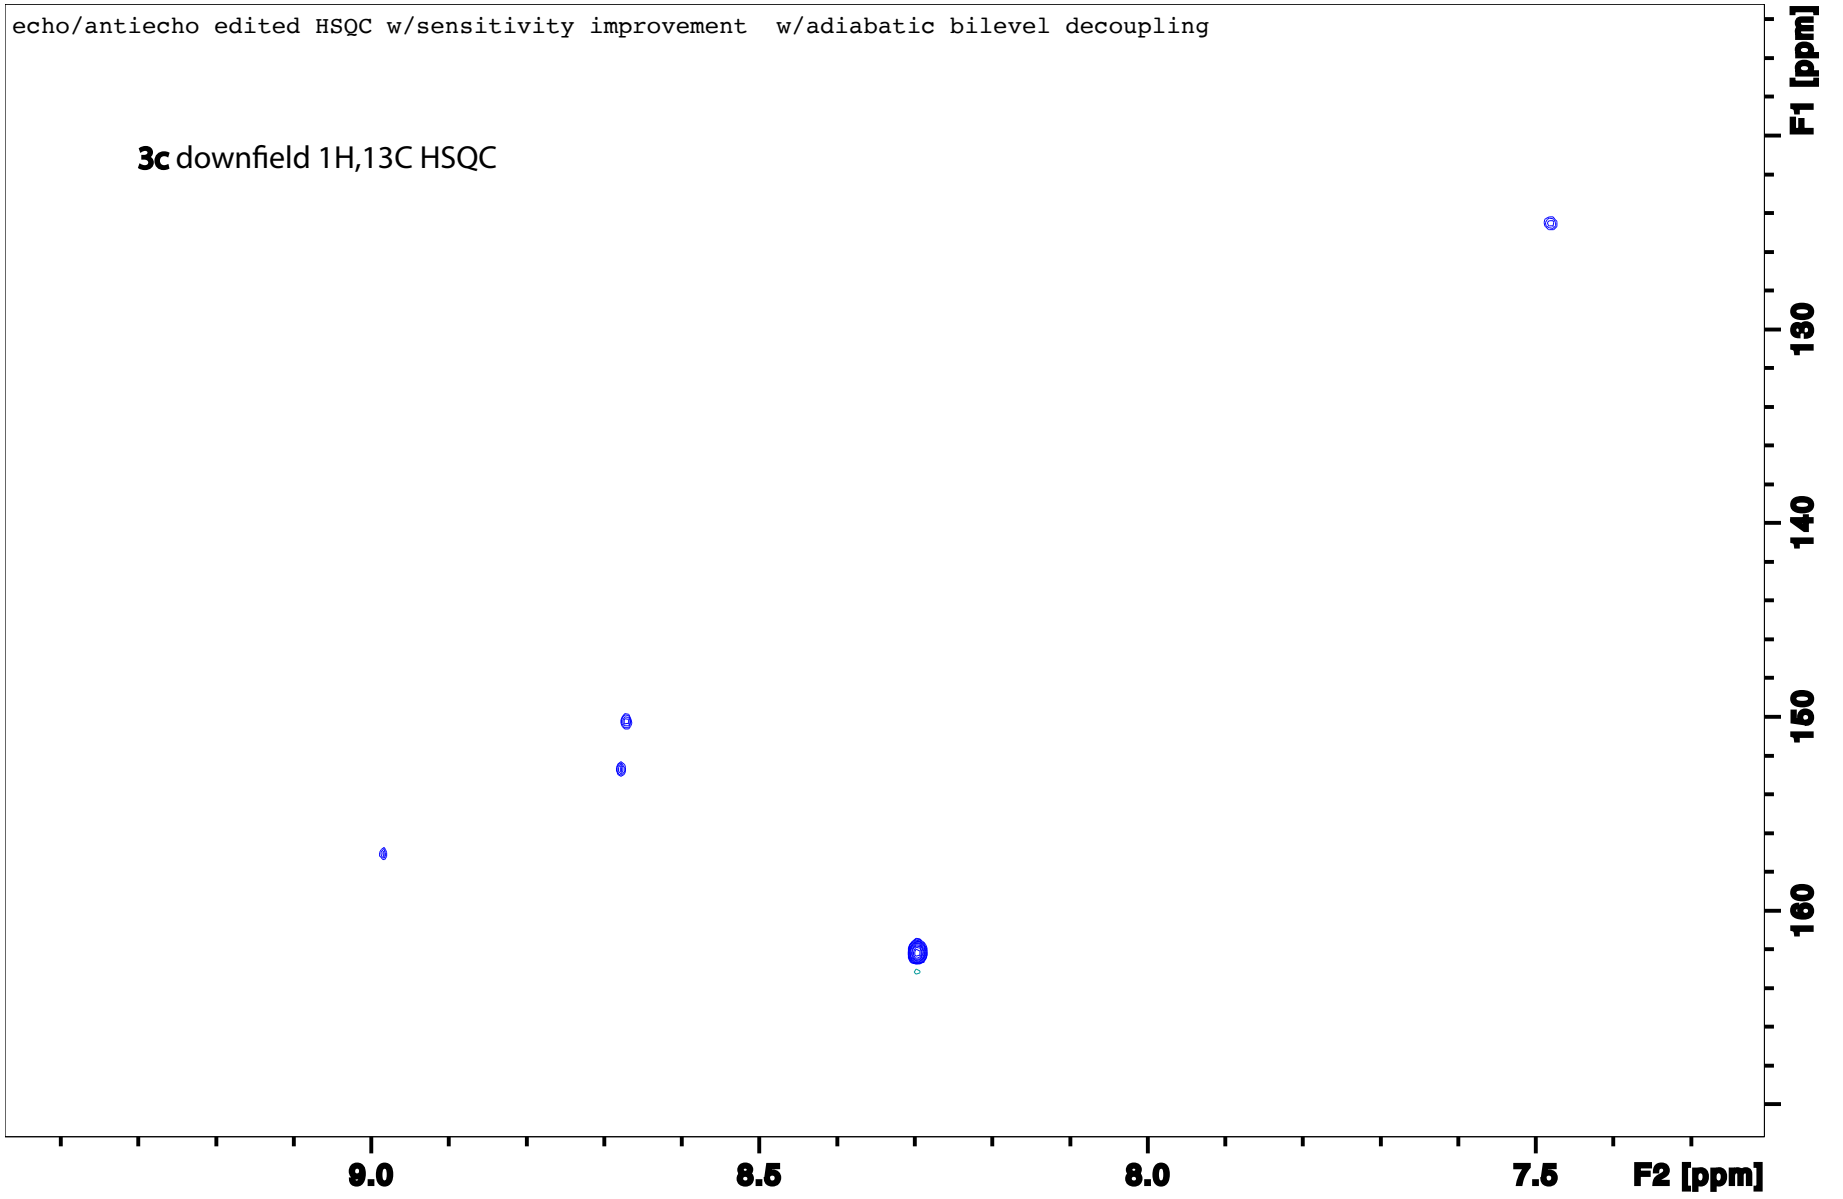

MNH



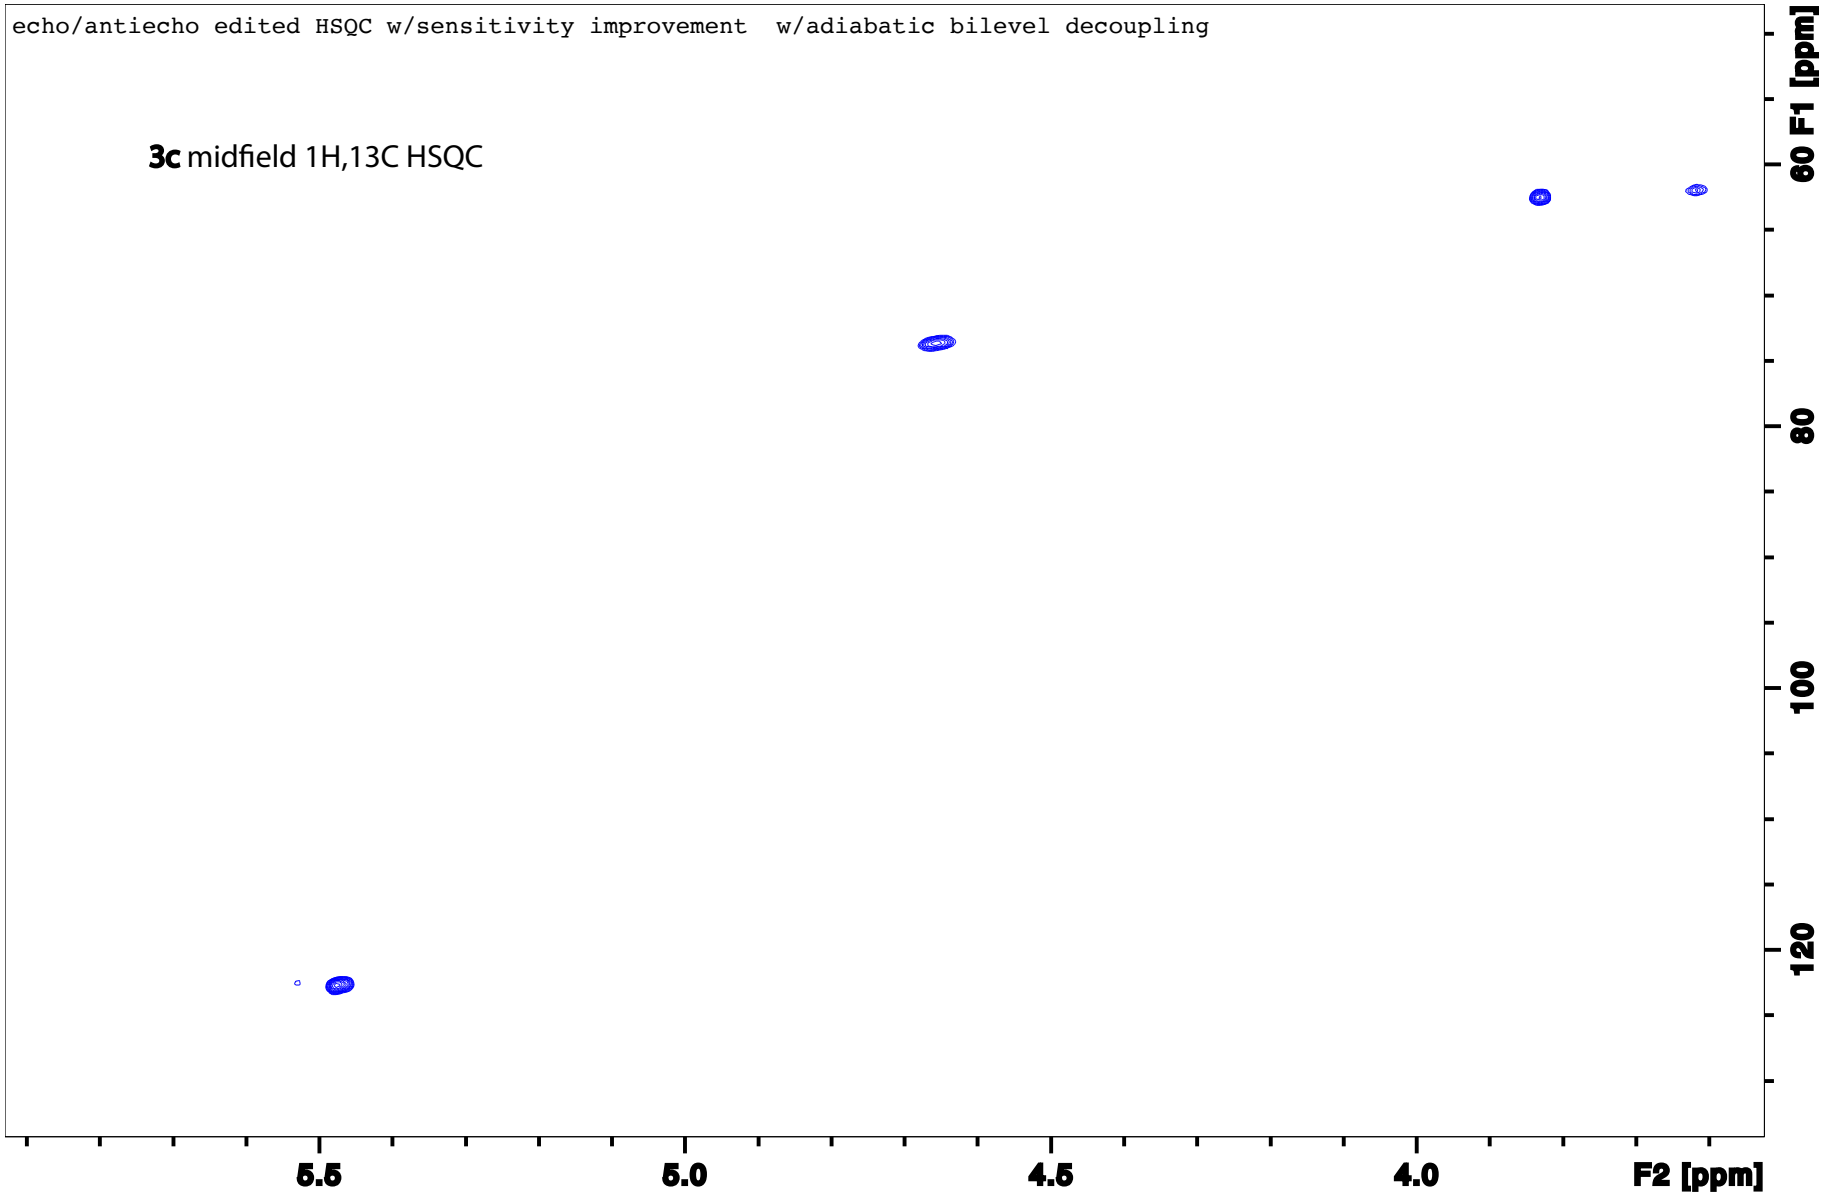

Handwritten blue scribble, possibly representing a chemical structure or a set of notes.

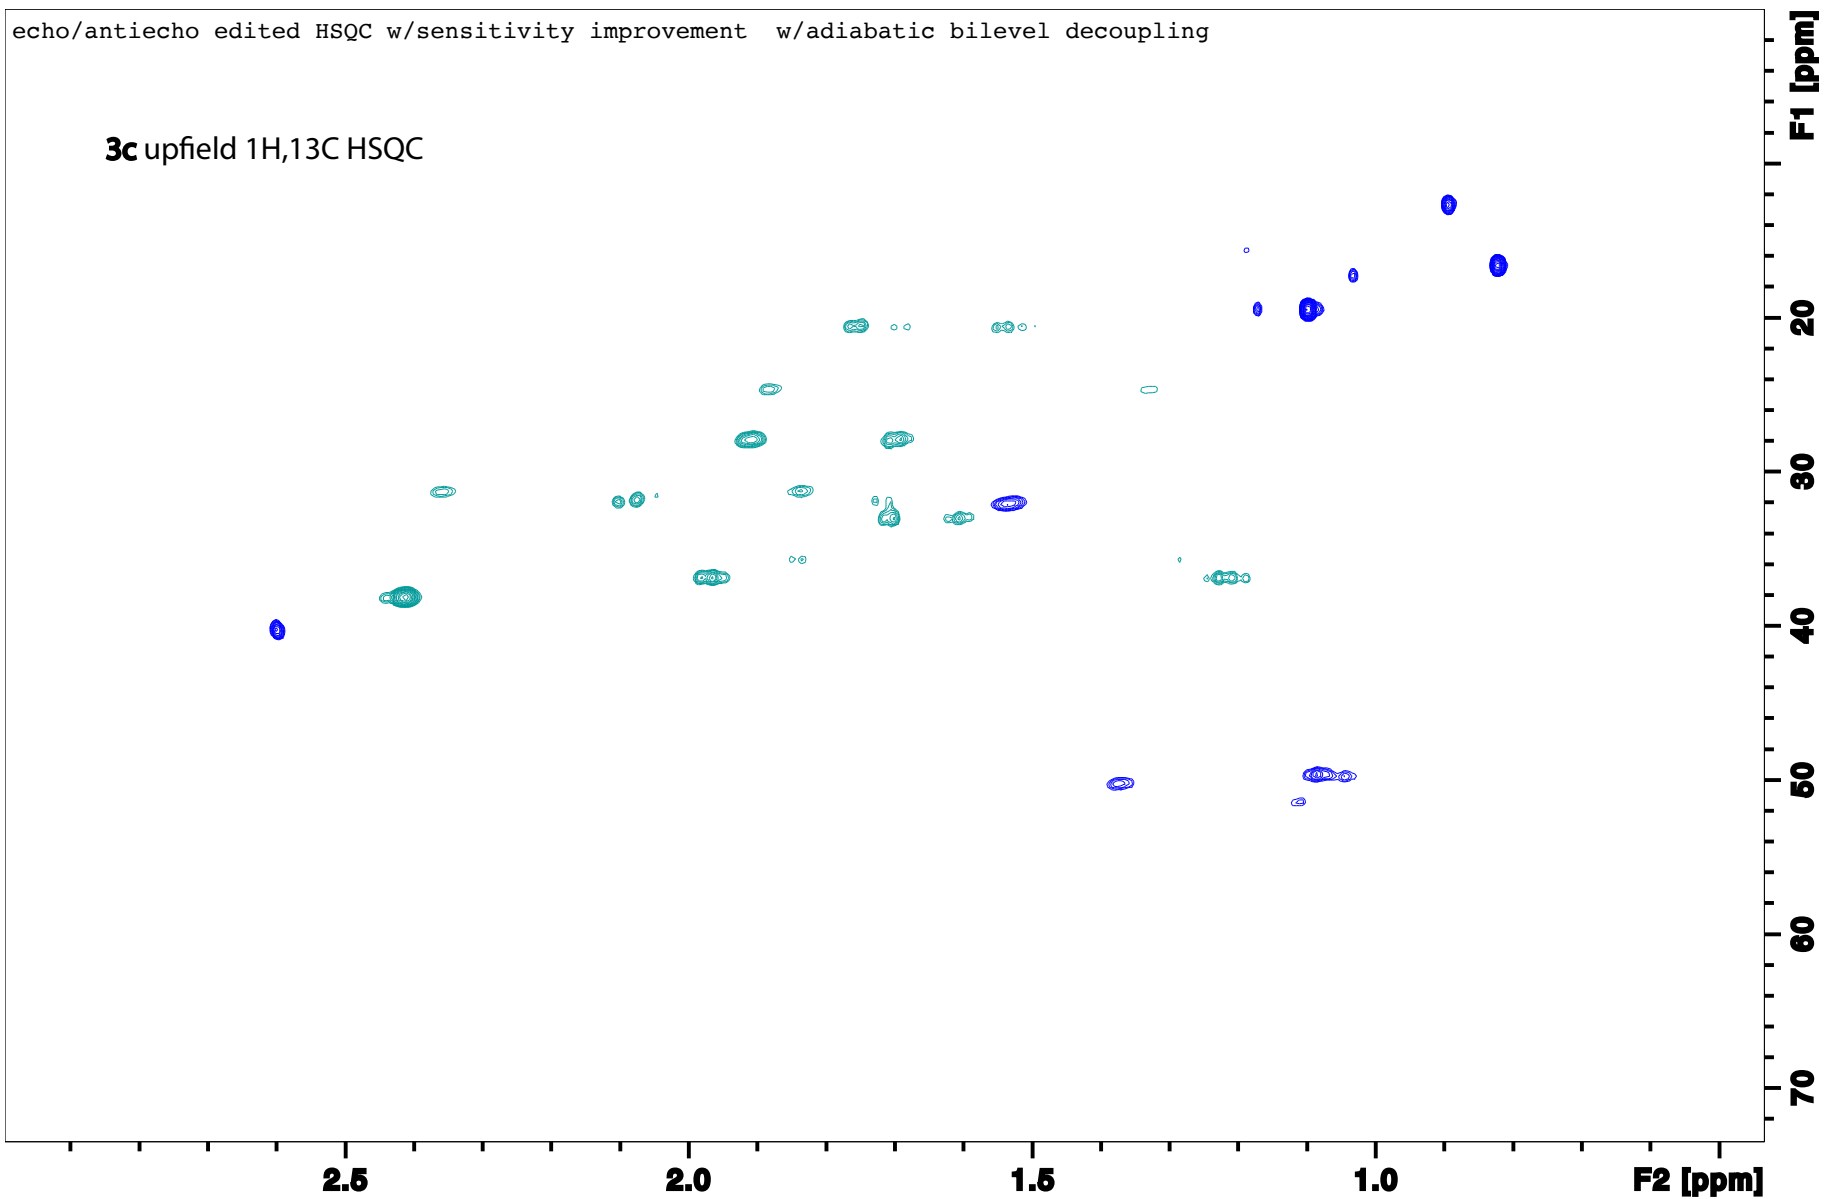

>

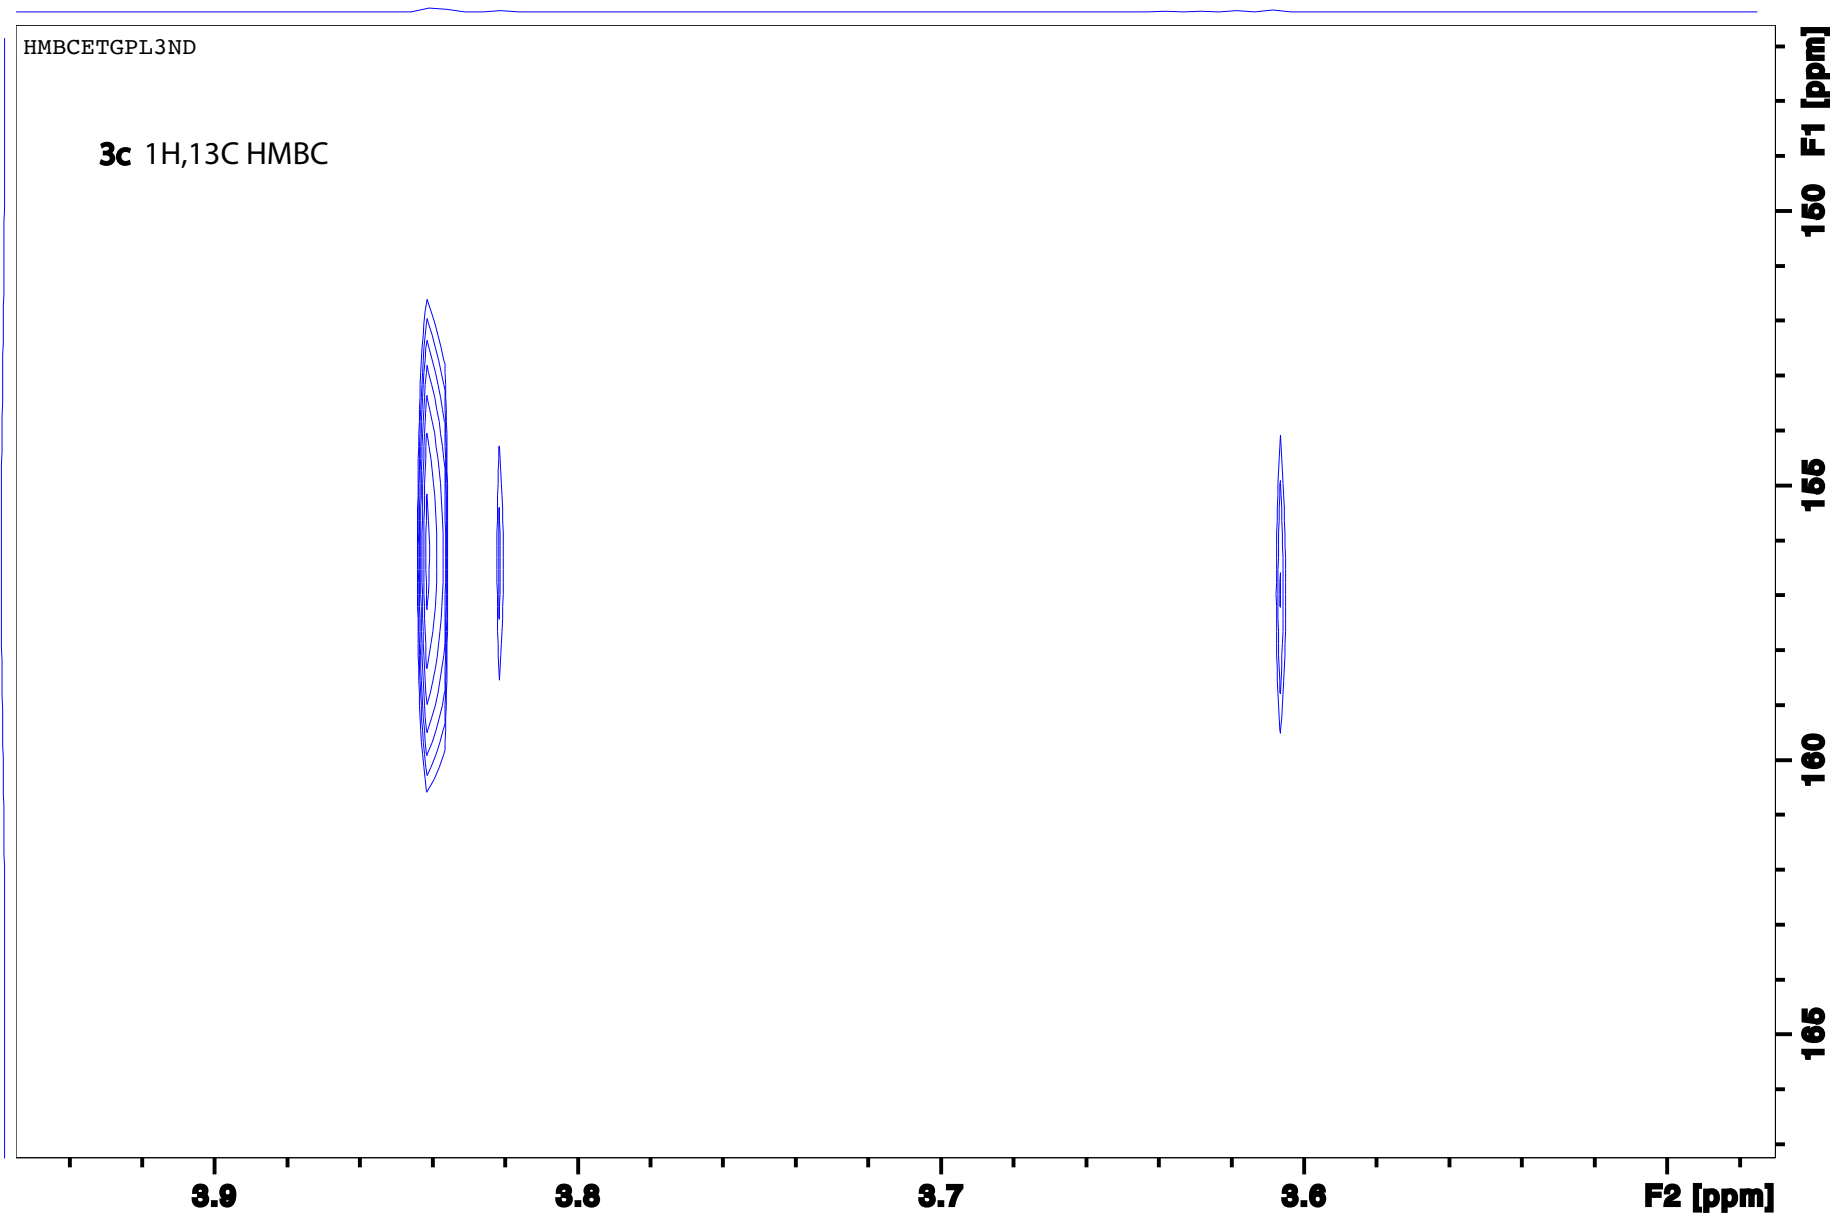

junegreen 10 1 /Users/pochapsk/brukerdata

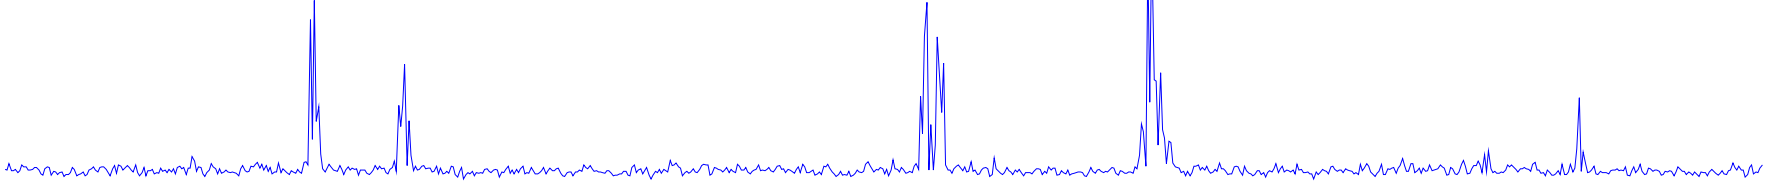

t\_15nhmbc DMSO /opt/nmrdata/user/ssp/ ssp 7

**3c** 1H, 15N HMBC

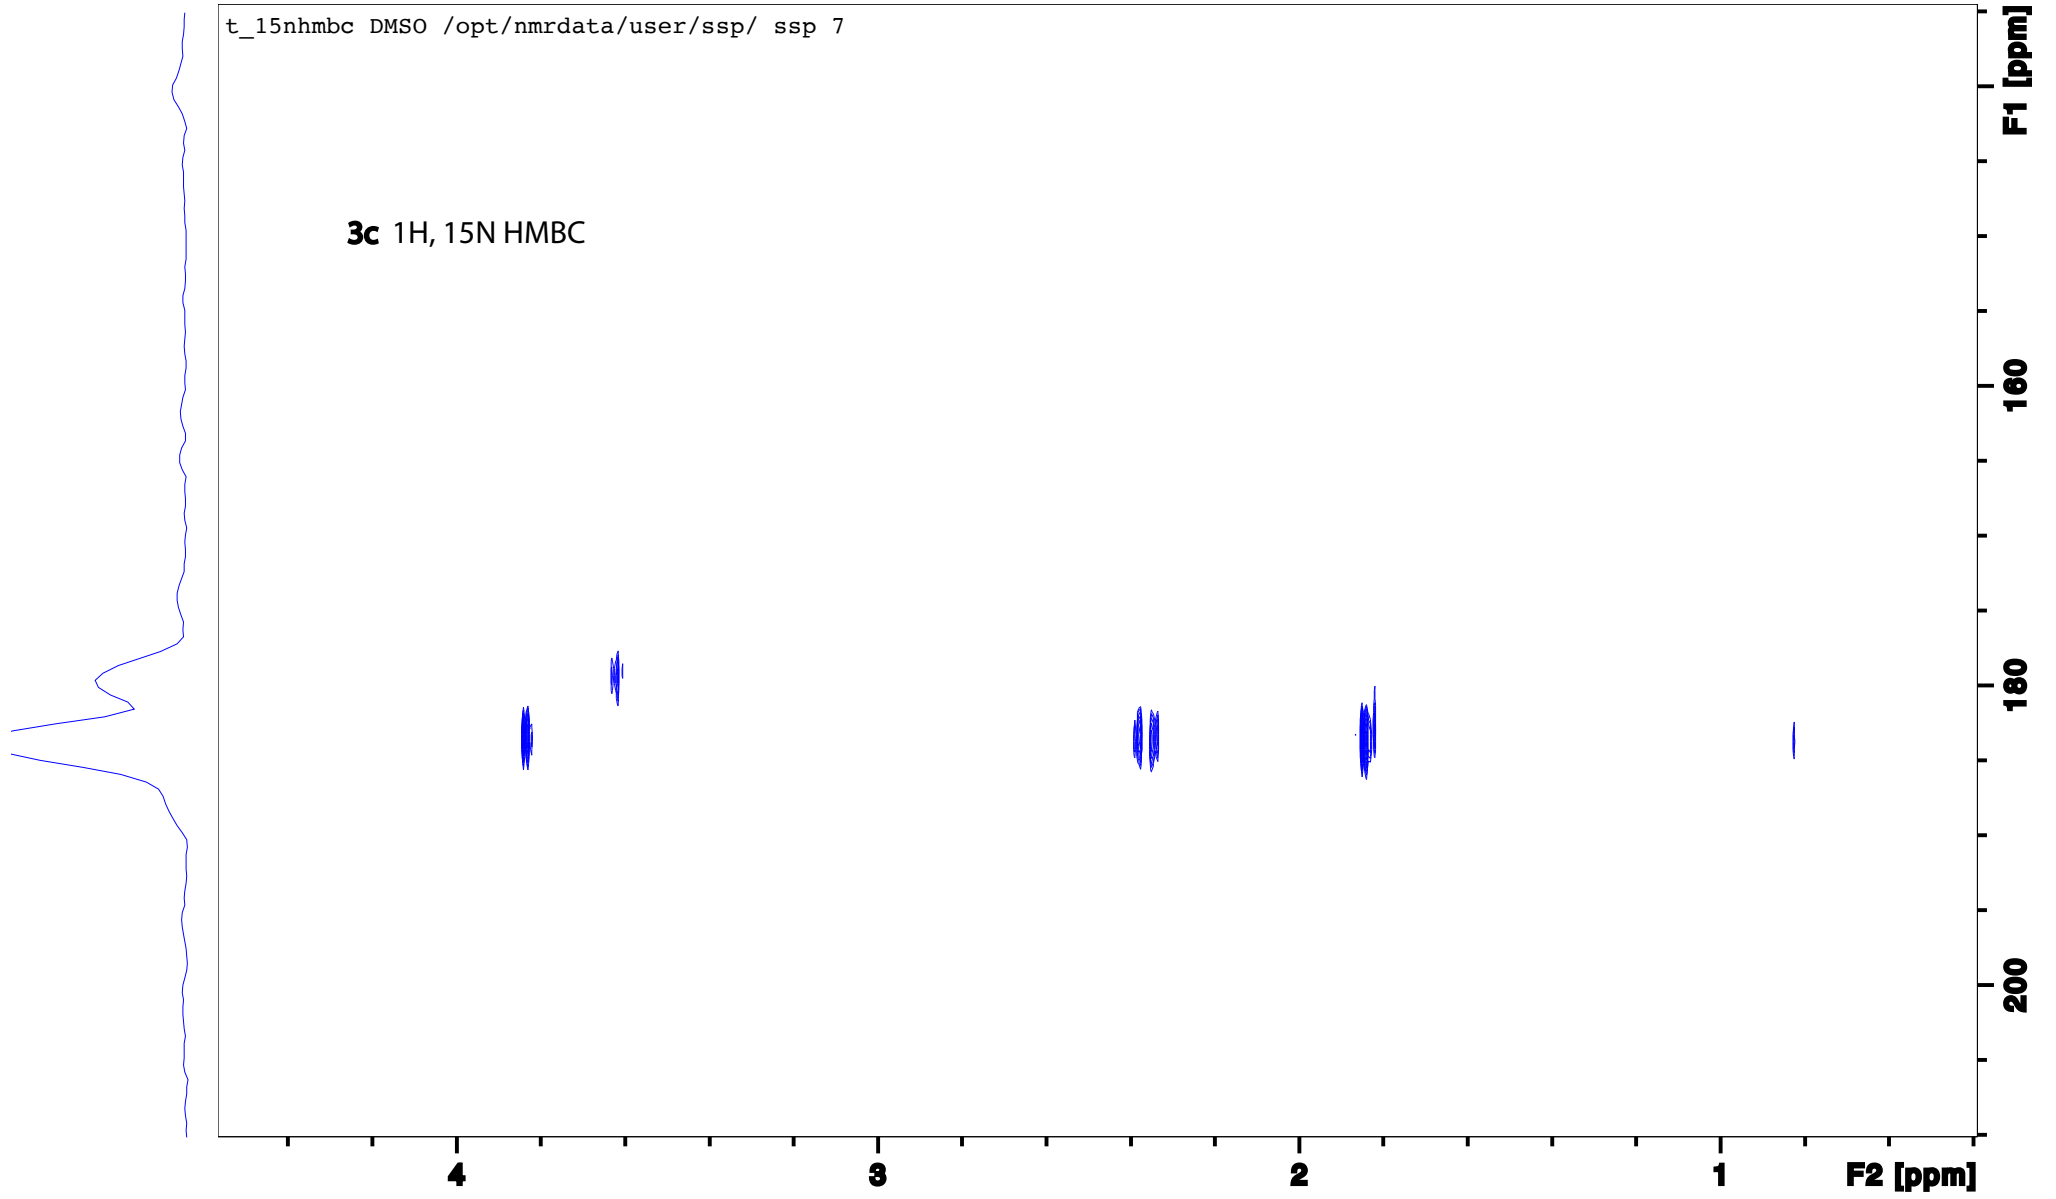

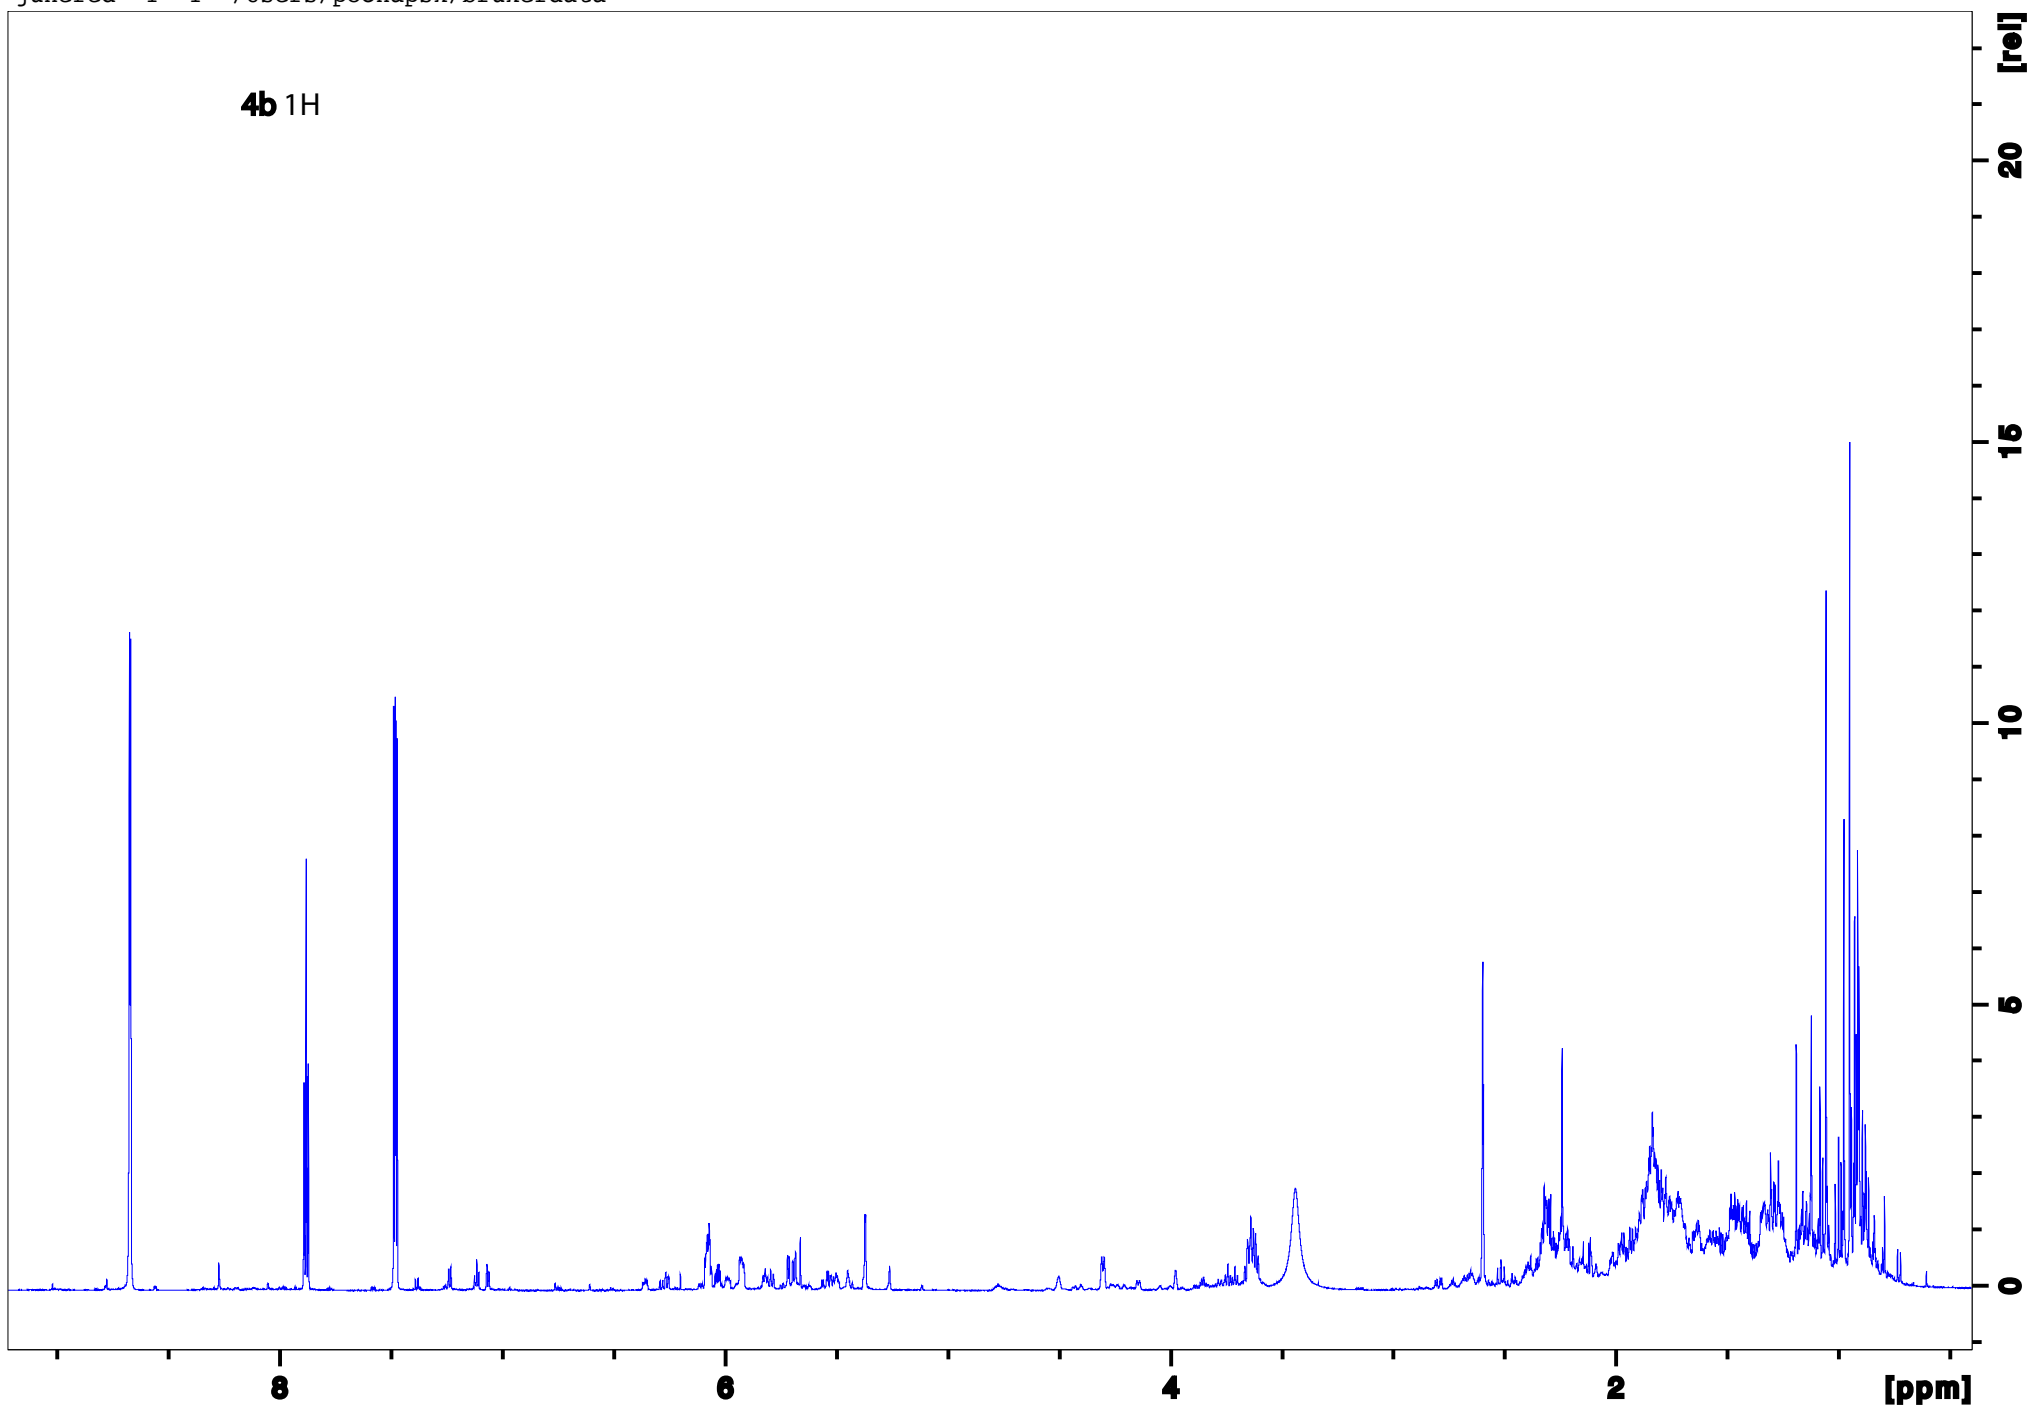

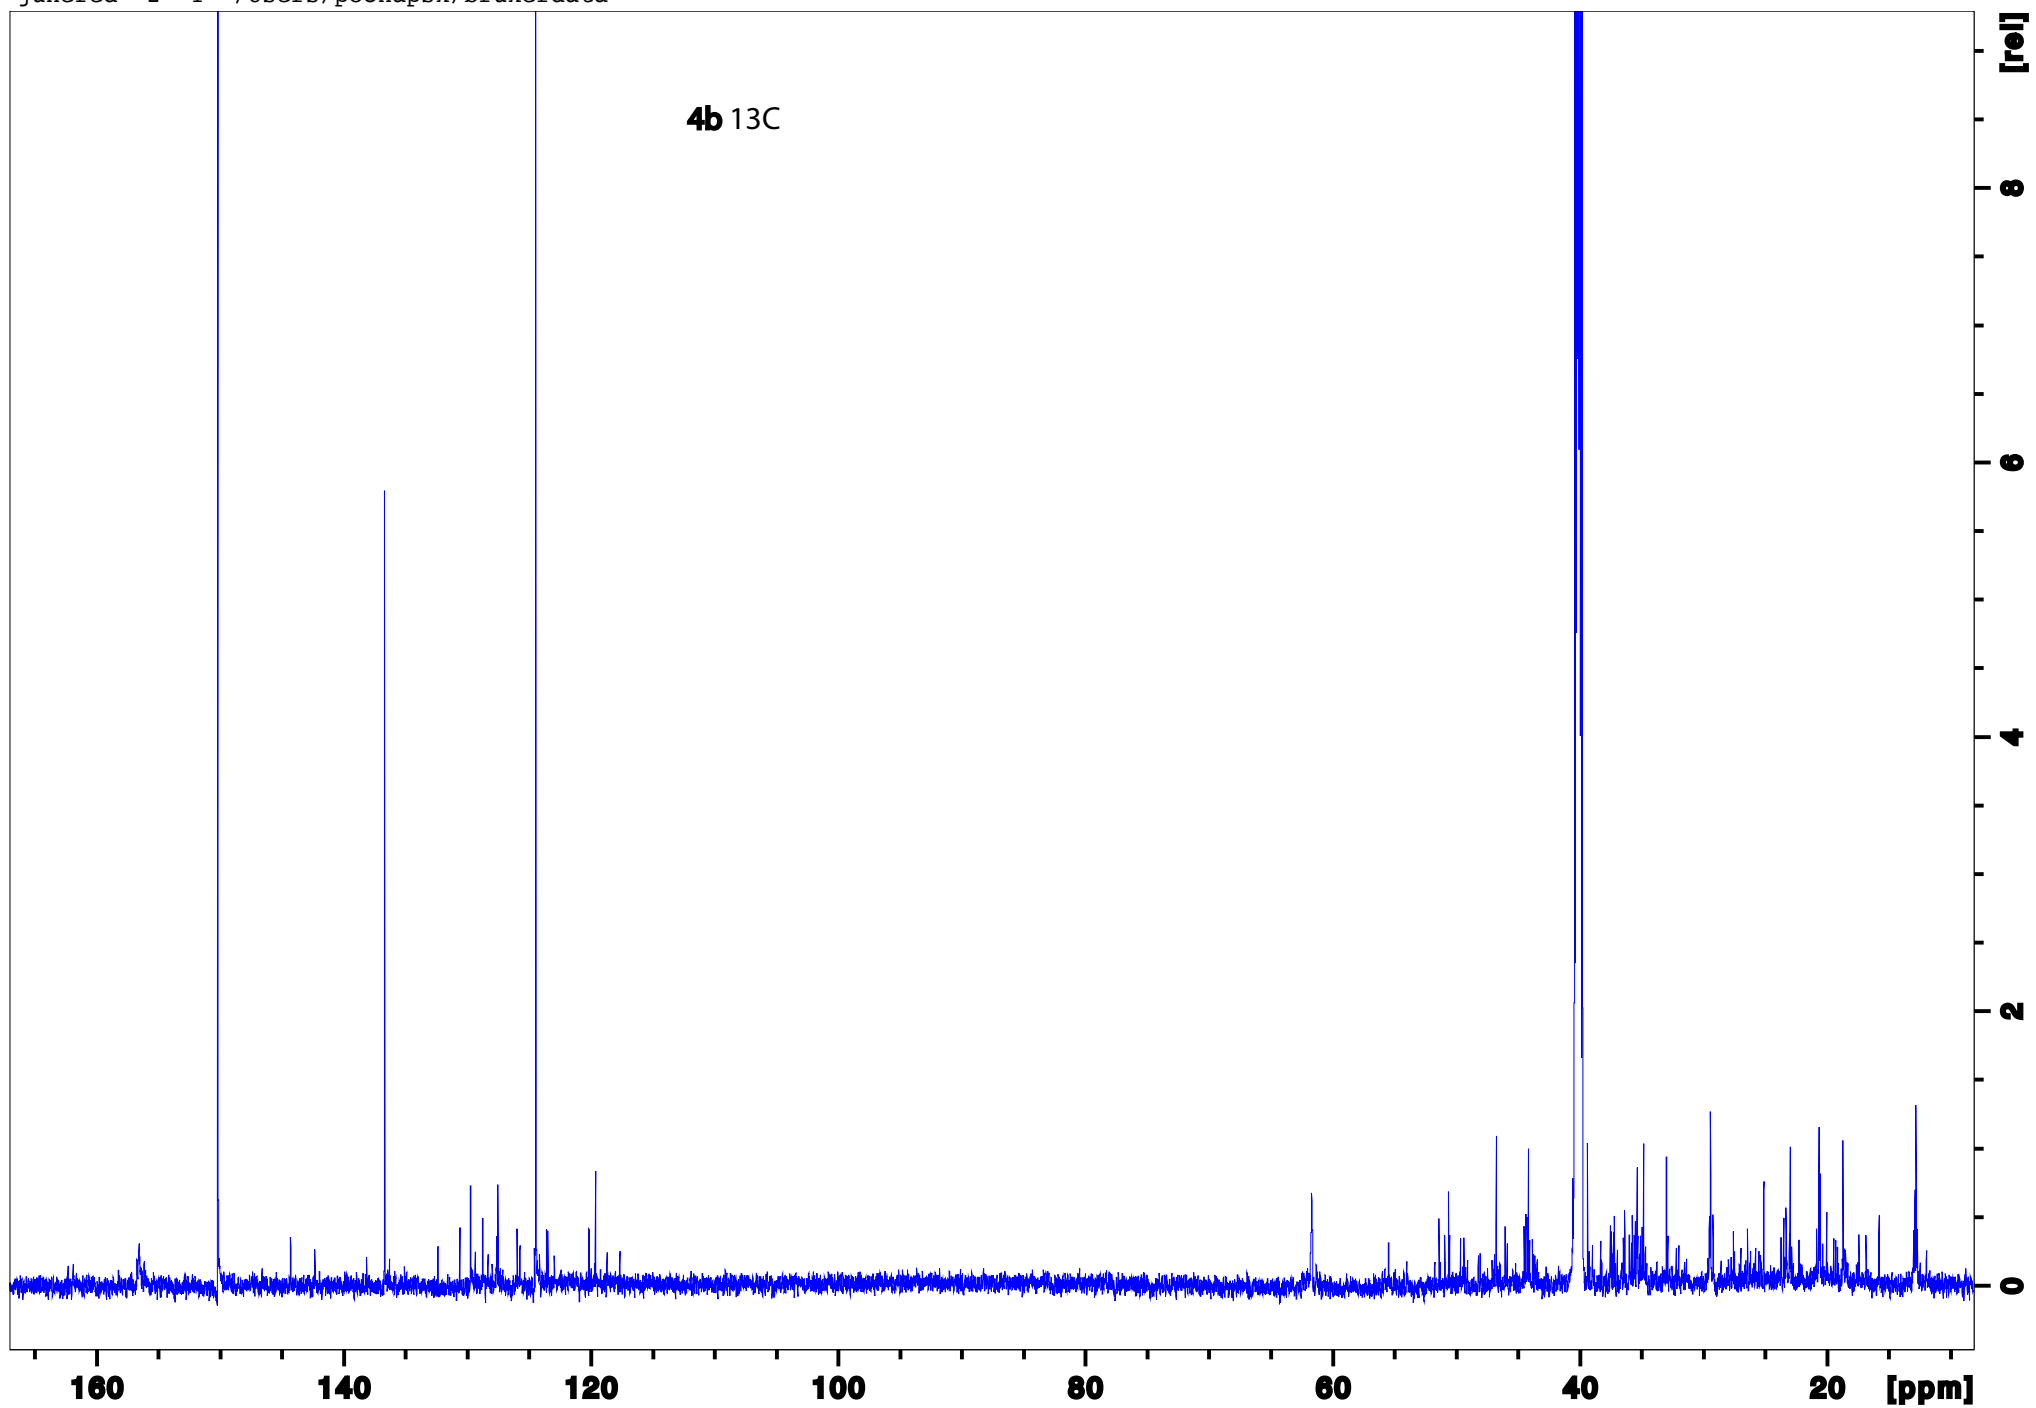

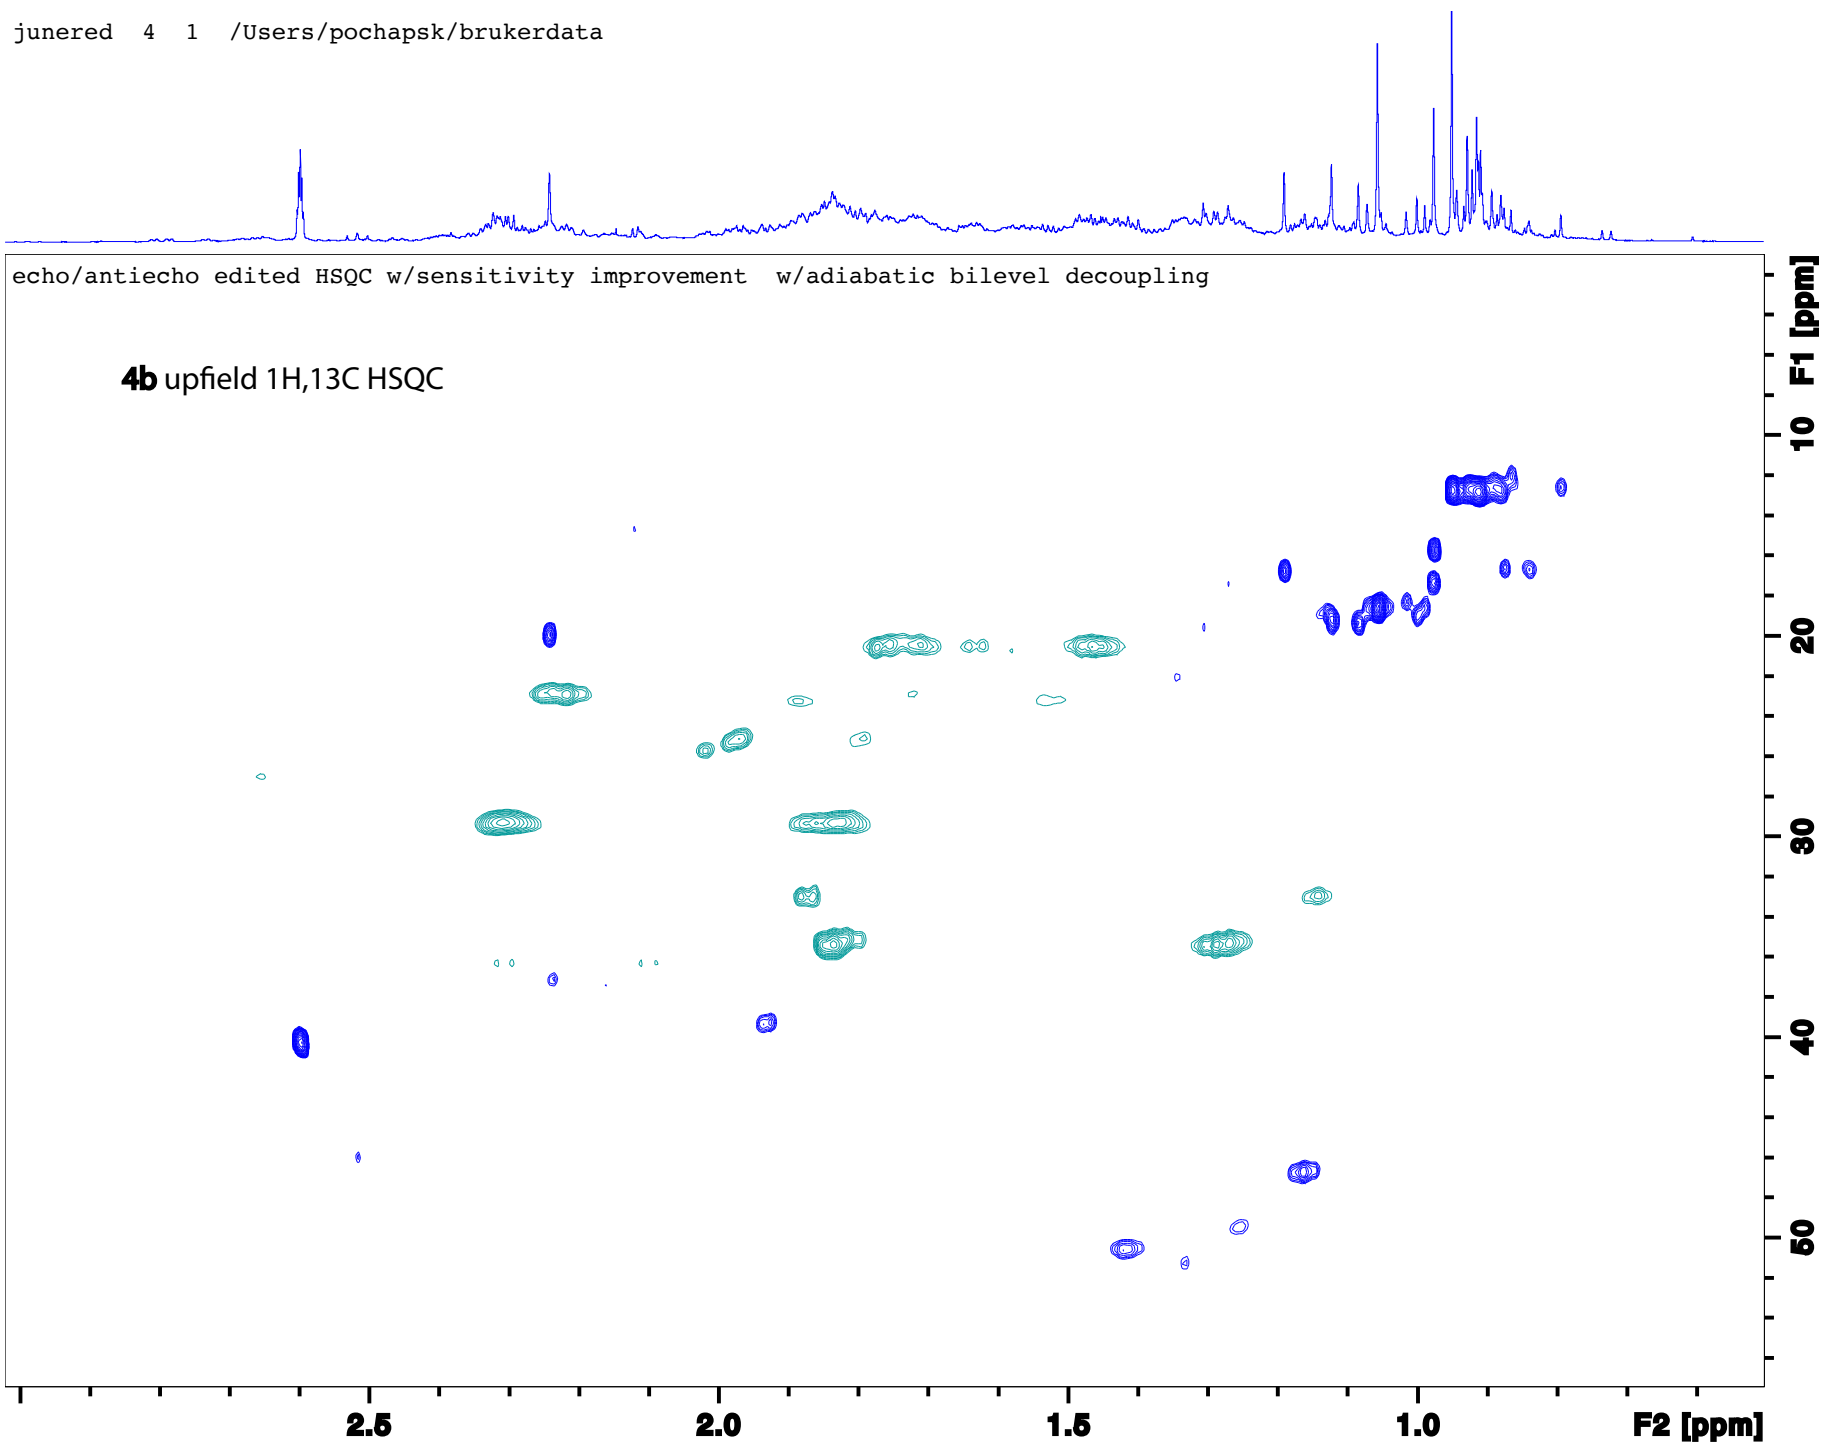

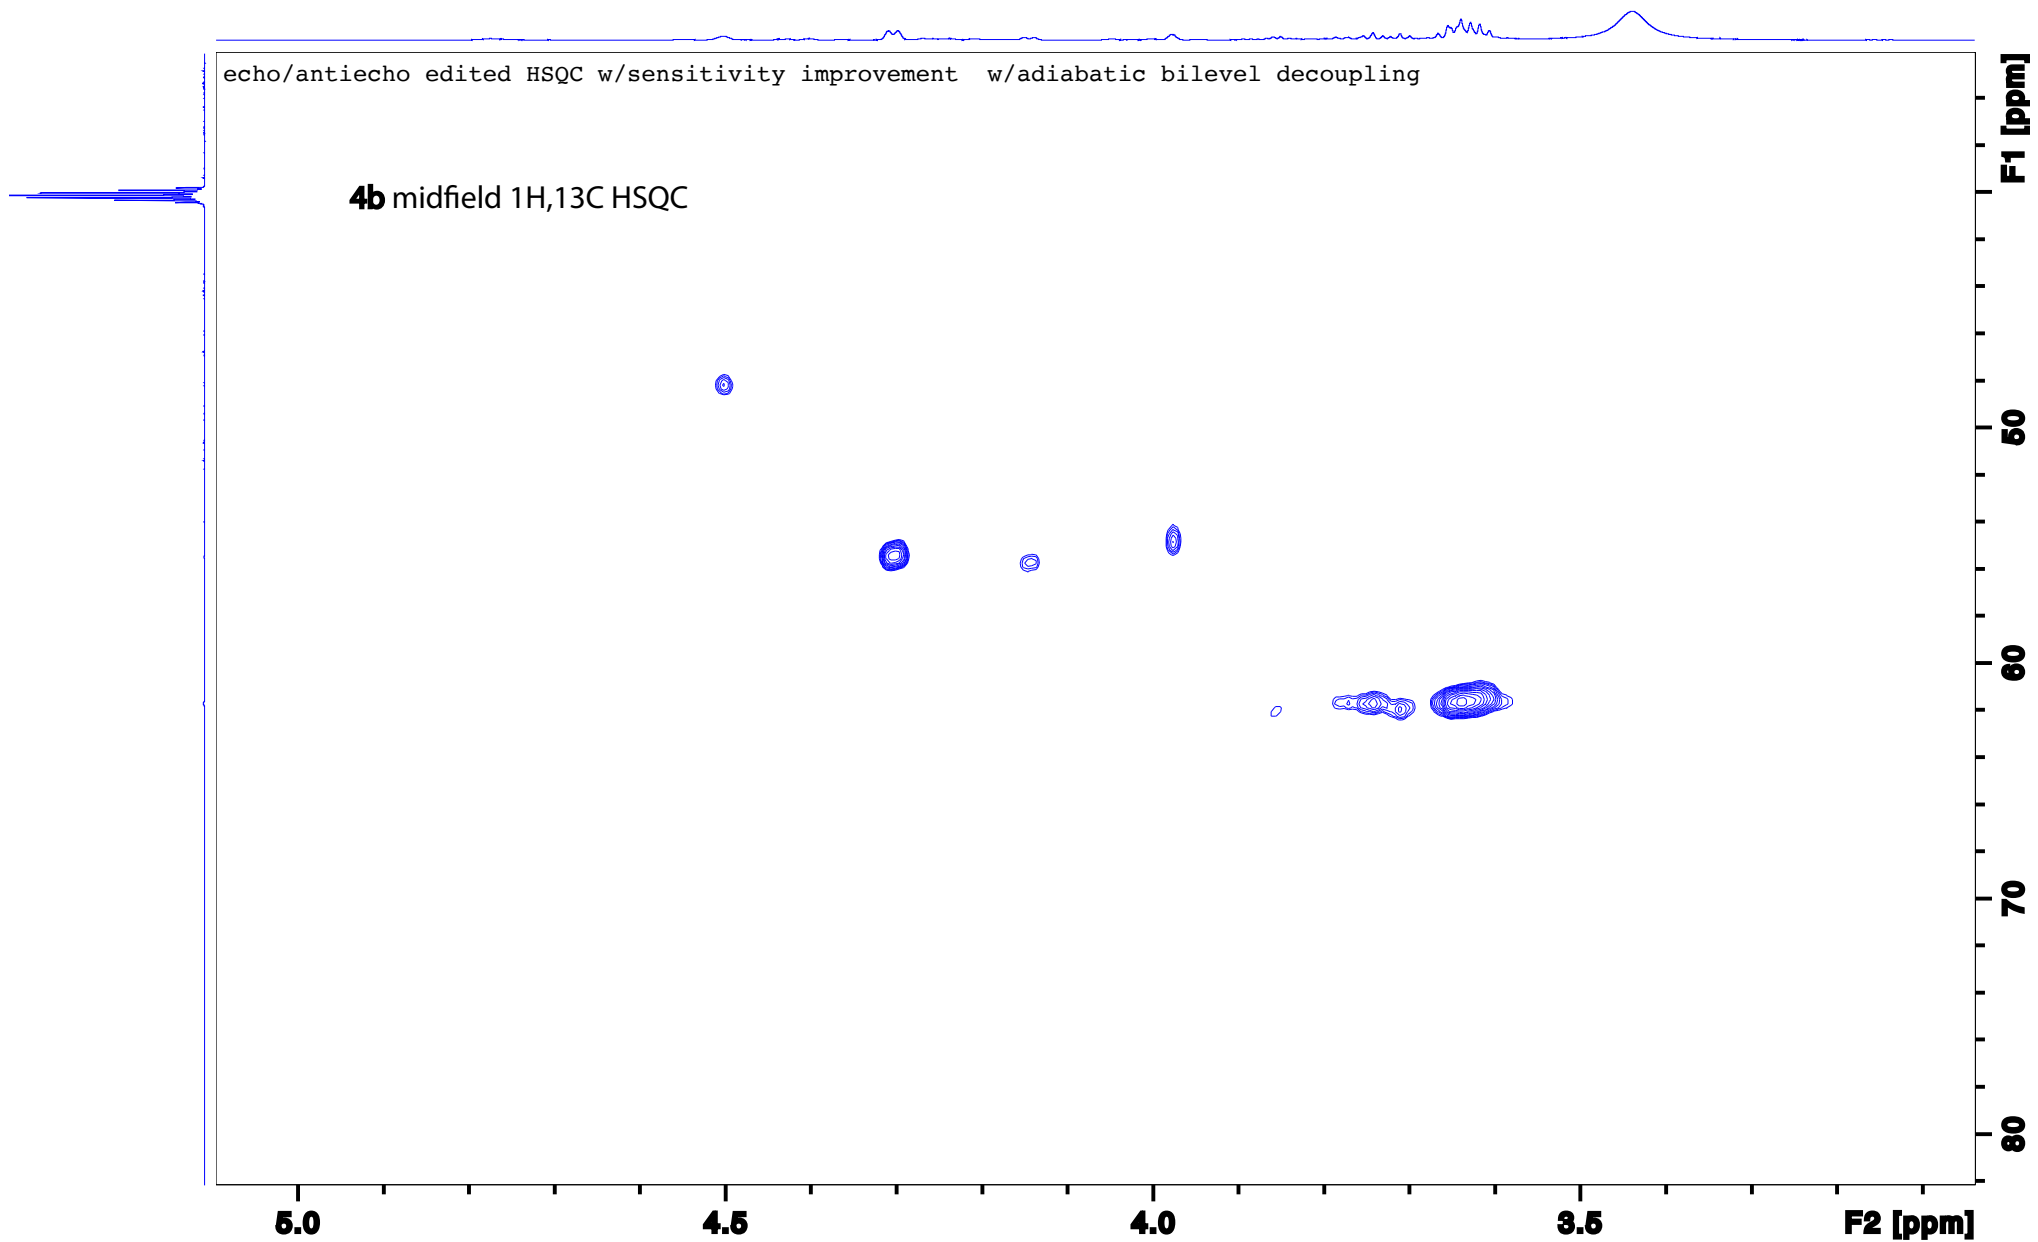



junered 4 1 /Users/pochapsk/brukerdata

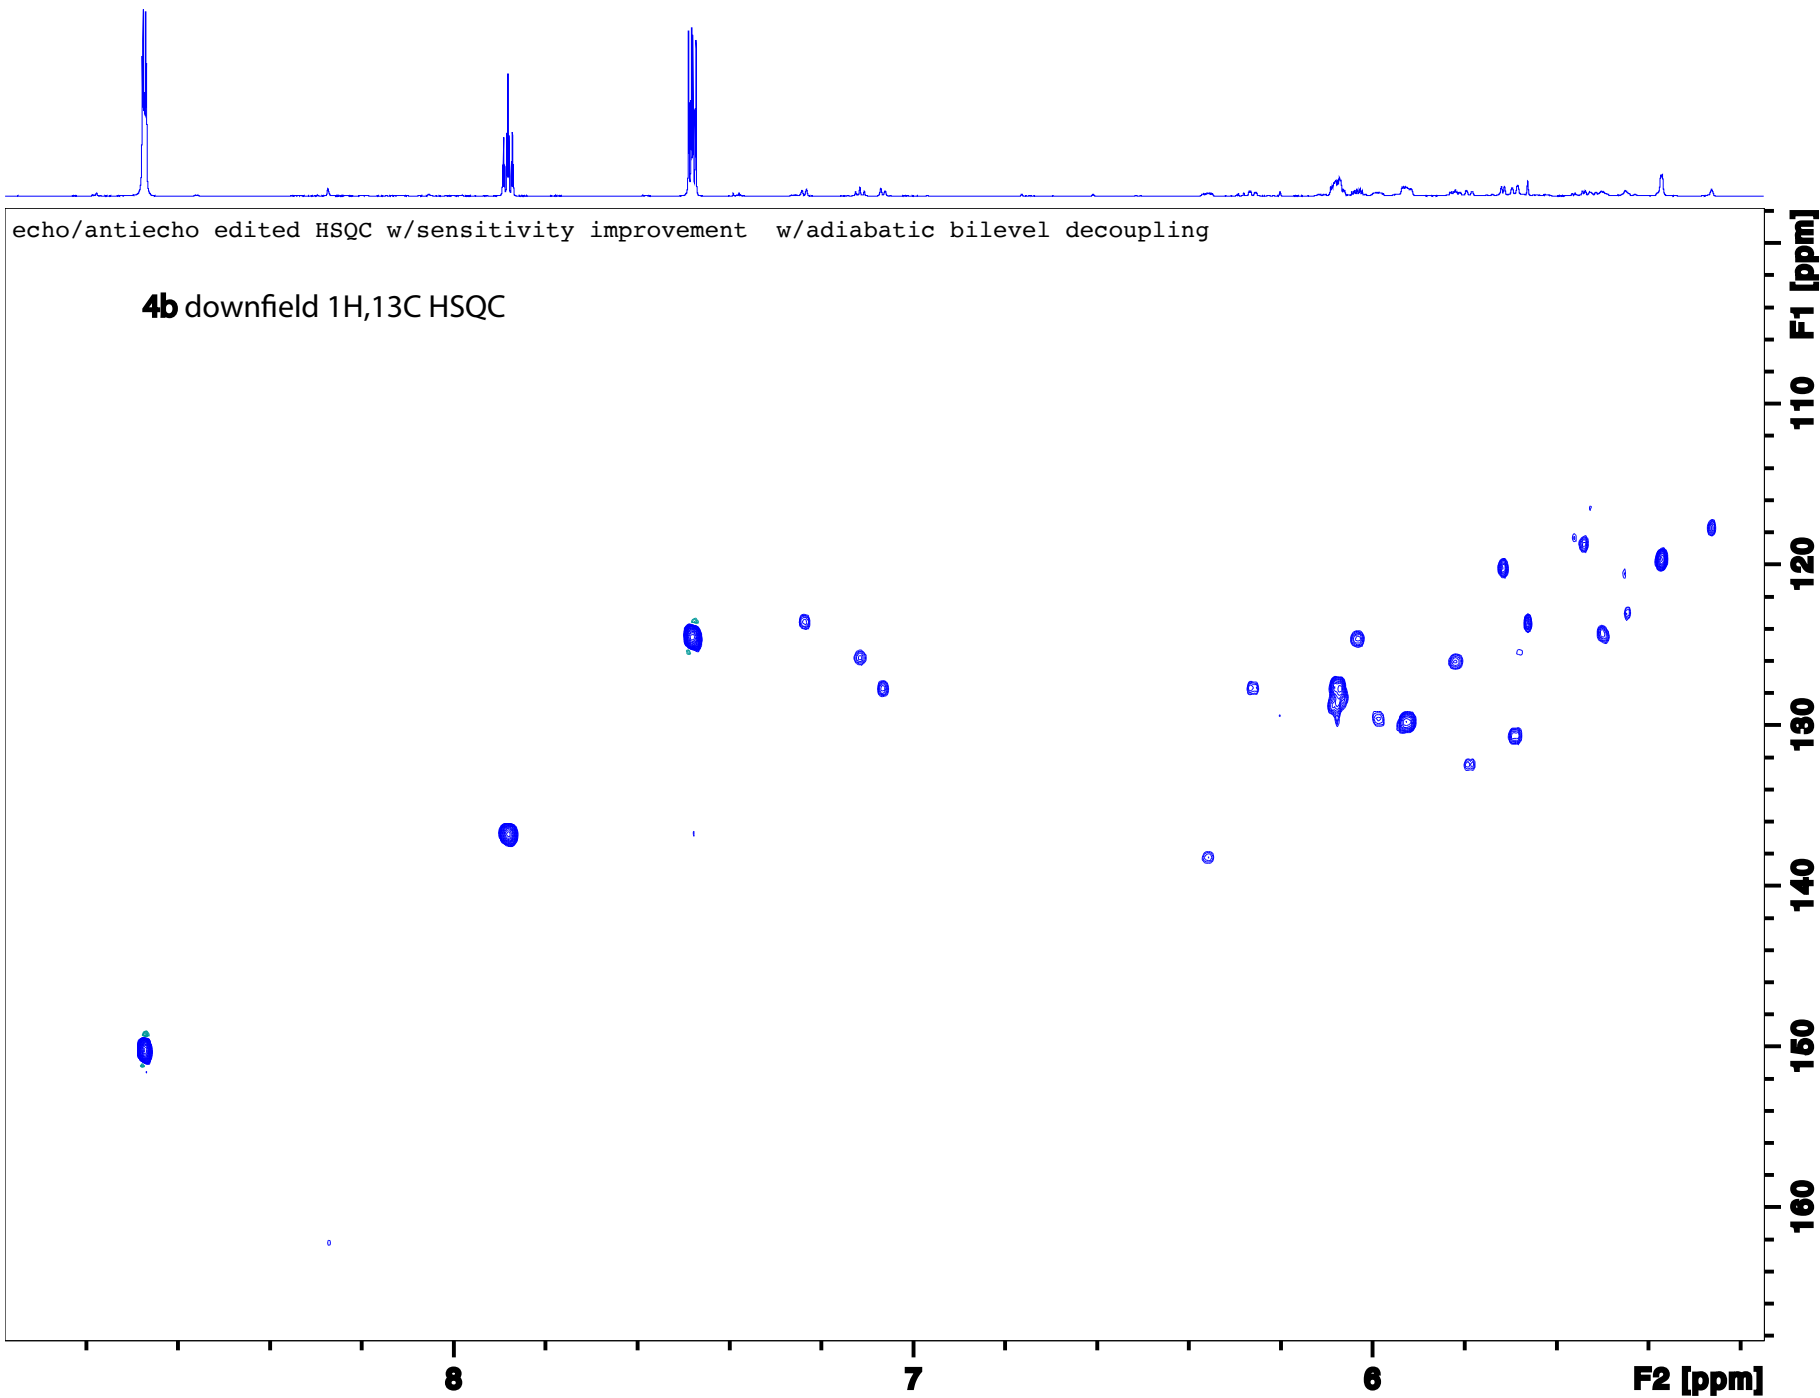

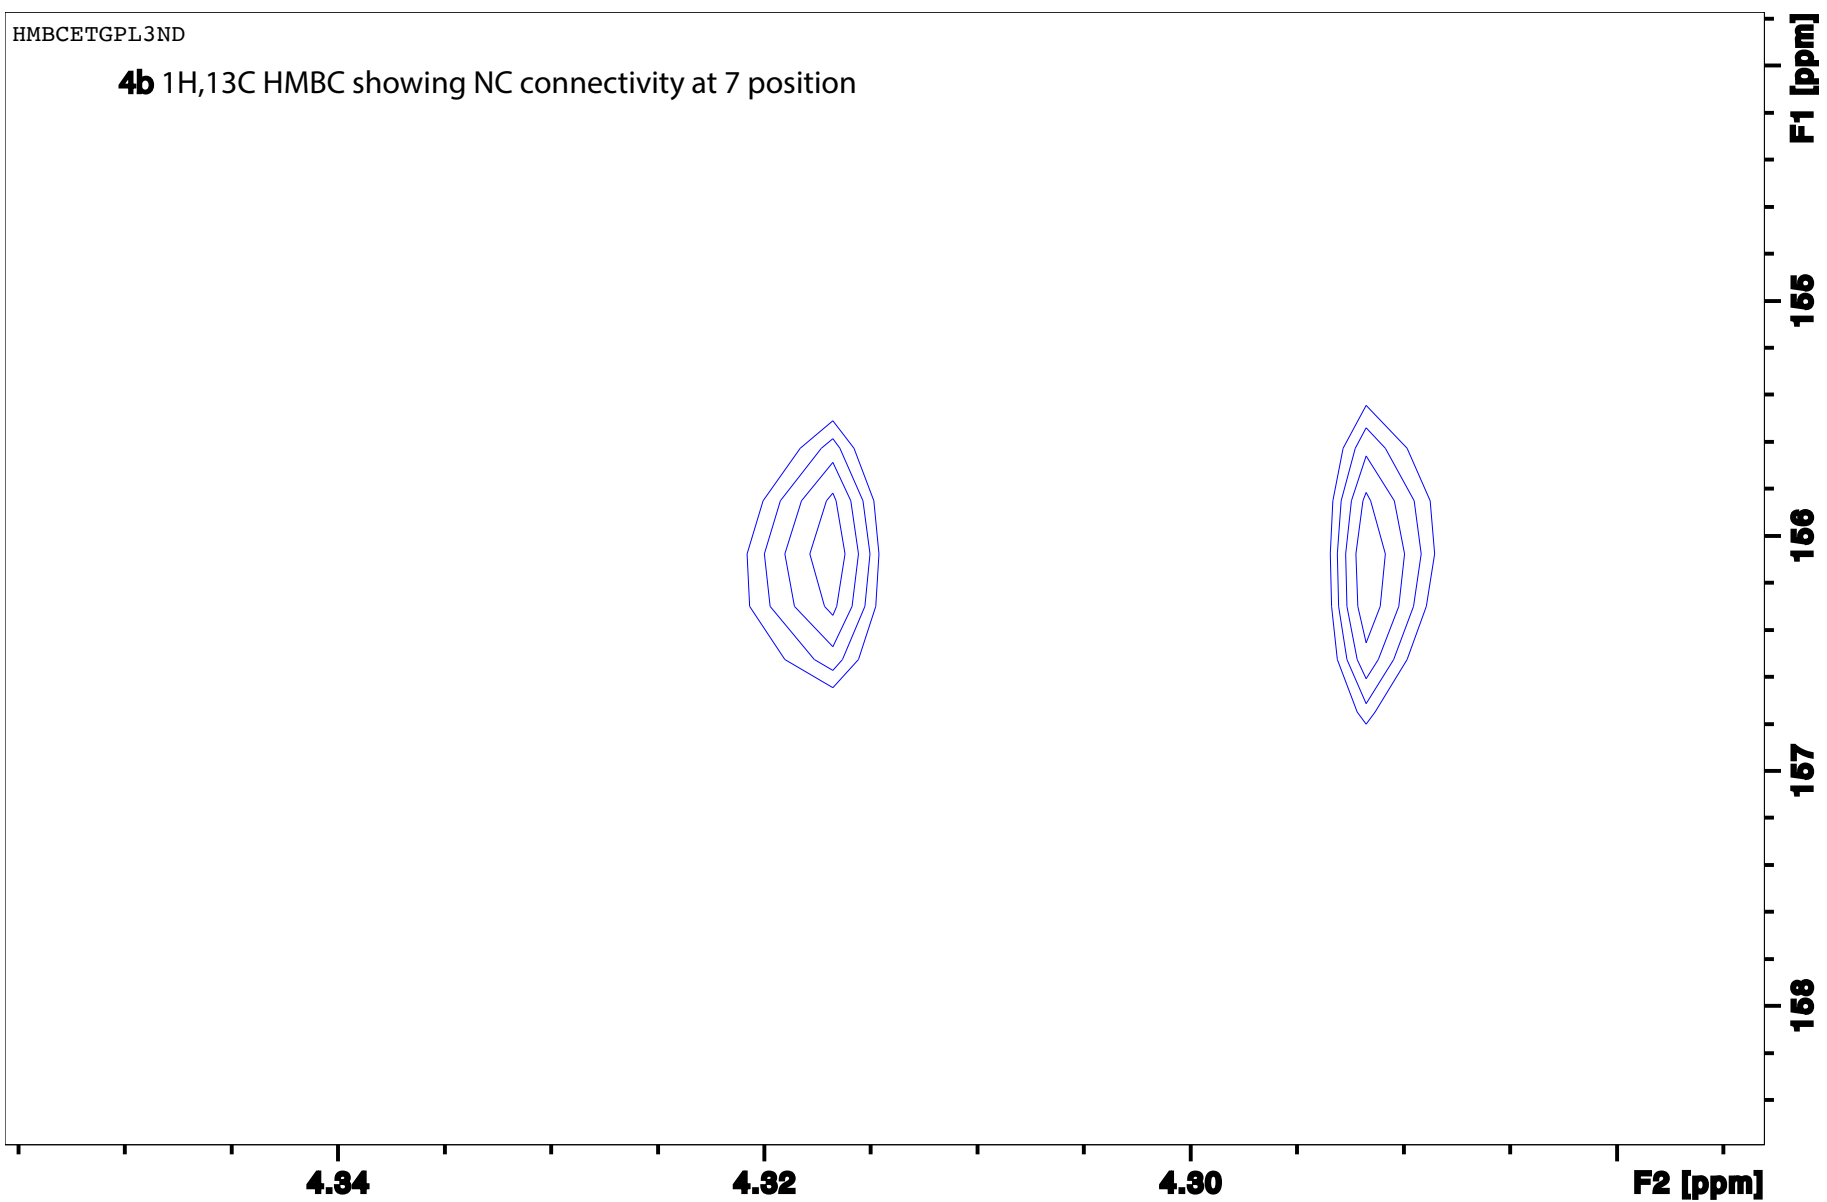

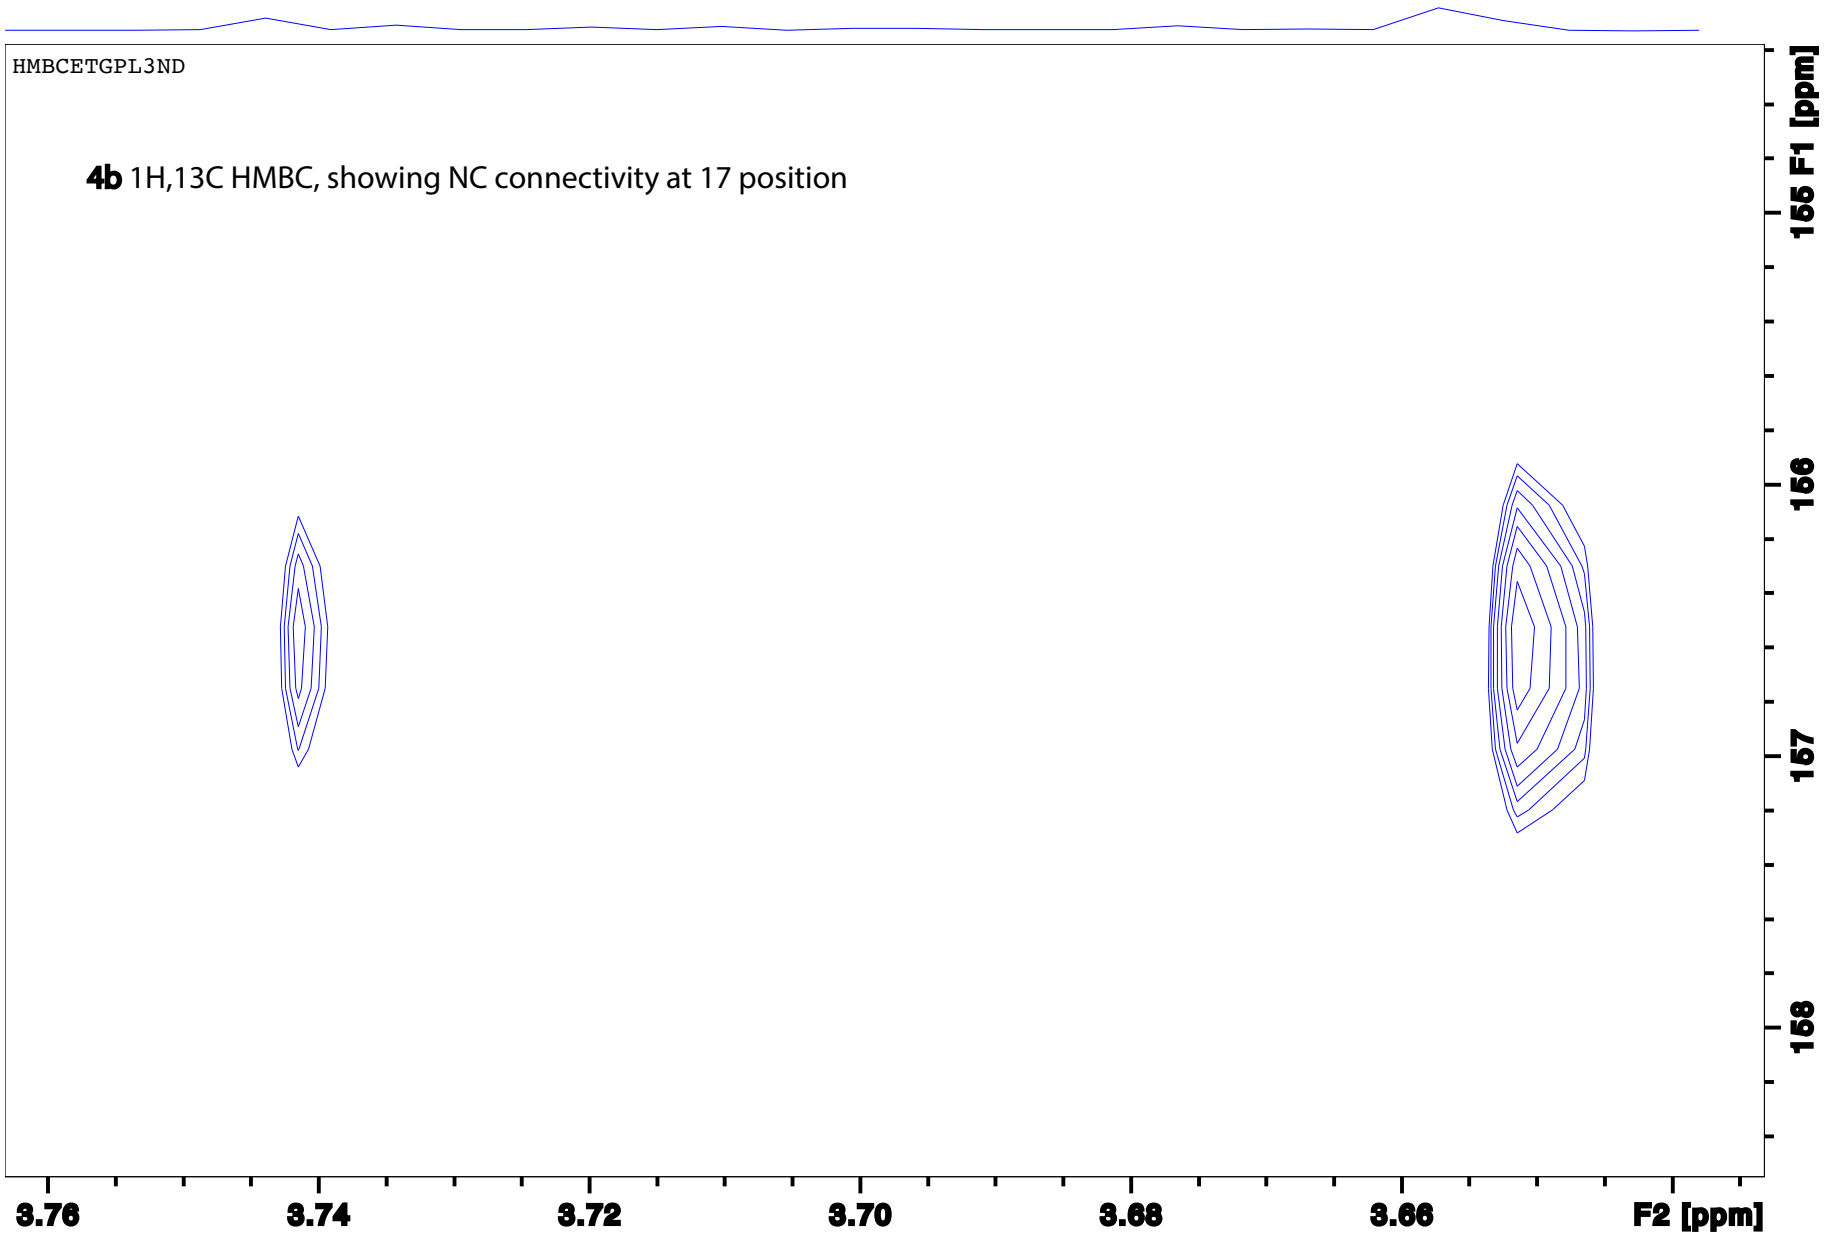

junered 10 1 /Users/pochapsk/brukerdata

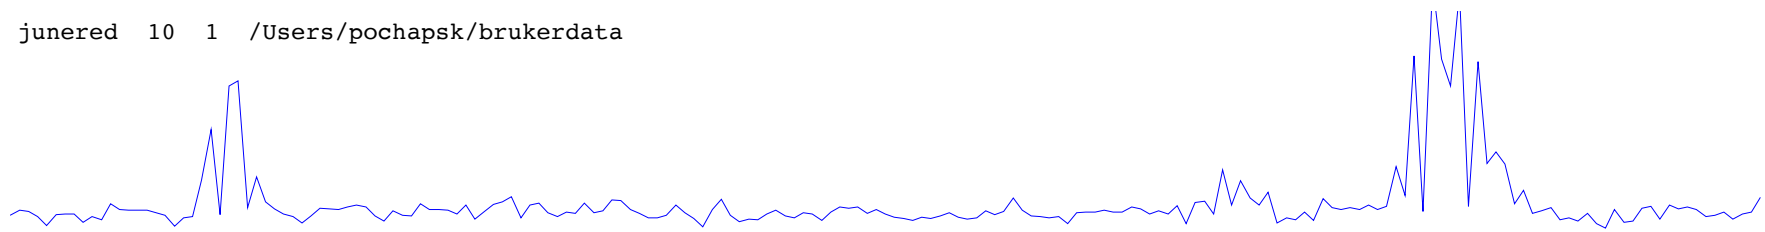

t\_15nhmhc DMSO /opt/nmrdata/user/ssp/ ssp 5

**4b** 1H,15N HMBC

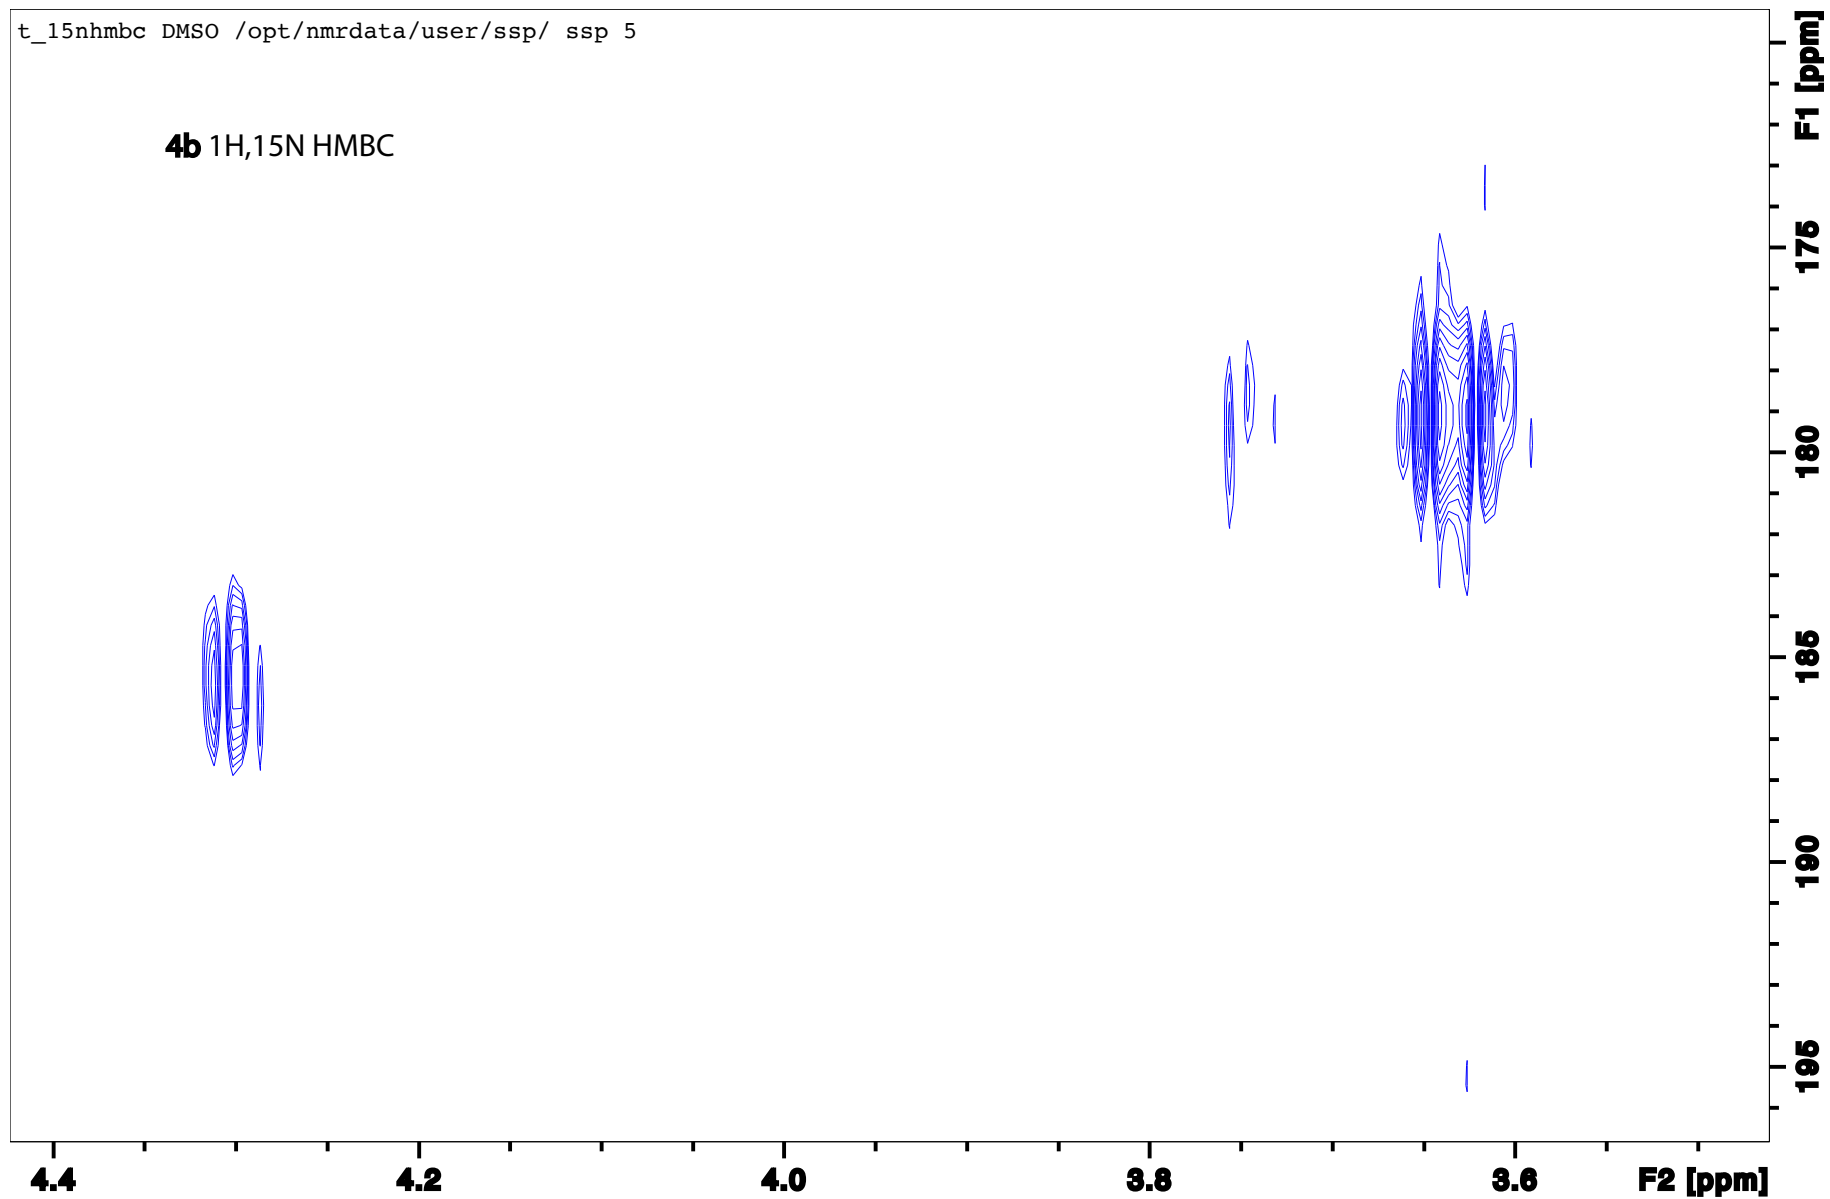

Supplement: 42004_2023_994_MOESM3_ESM.pdf [file 42004_2023_994_MOESM3_ESM.pdf]
