# Supplementary material for: Selective steroidogenic cytochrome P450 haem iron ligation by steroid-derived isonitriles
Source: PubMed Central journal article supplement (PMC10475101; doi:10.1038/s42004-023-00994-3), 2023-09-02
Supplement: 42004_2023_994_MOESM1_ESM.pdf [file 42004_2023_994_MOESM1_ESM.pdf]

1  
2  
3  
4  
5  
6  
7  
8  
9  
10  
11  
12  
13  
14  
15  
16  
17

Supplementary information for:

**Selective steroidogenic cytochrome P450 haem iron ligation using steroid-derived isonitriles.**

**Alaina M. Richard, Nathan R. Wong, Kurt Harris, Reethy Sundar, Emily E. Scott and Thomas C. Pochapsky**

**Supplementary Methods**

|                                                                                    |                |
|------------------------------------------------------------------------------------|----------------|
| <b>S1) Synthesis and characterization of compounds 1-4</b>                         | <b>pp. 2-6</b> |
| <b>S2) Ligand binding and inhibition assays</b>                                    | <b>pp. 6-7</b> |
| <b>S3) Crystallization of 1-CYP17A1 complex and X-ray diffraction</b>              | <b>p. 8</b>    |
| <b>S4) X-ray data collection, refinement, and validation statistics (Table S1)</b> | <b>p. 9</b>    |
| <b>S5) Supplementary references</b>                                                | <b>p.10</b>    |

18

## Supplementary Methods

## 19 S1) Synthesis and characterization of compounds 1-4

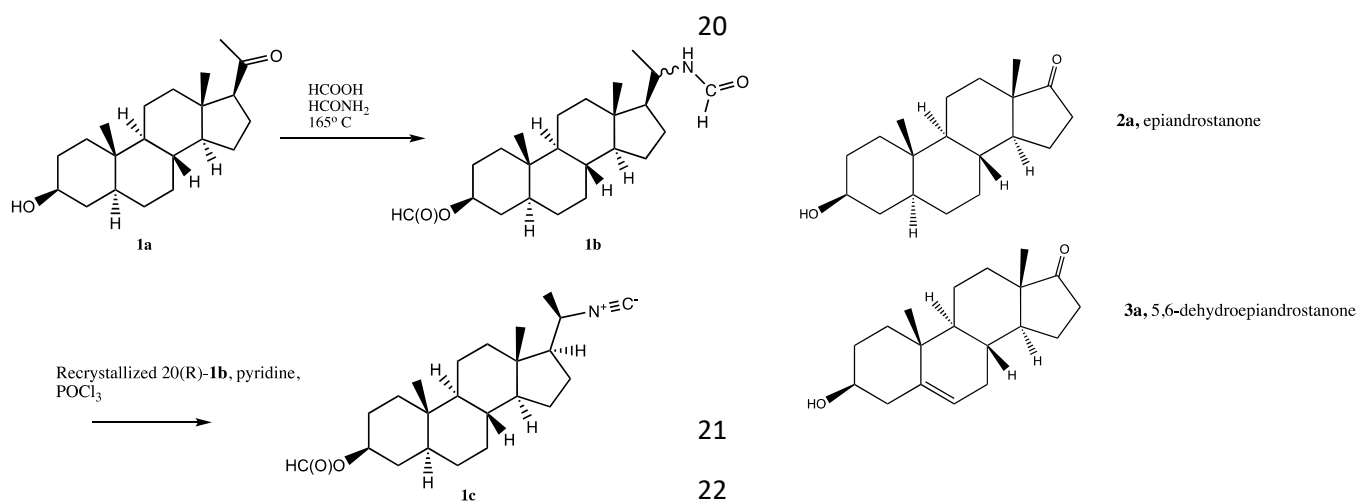

23

24

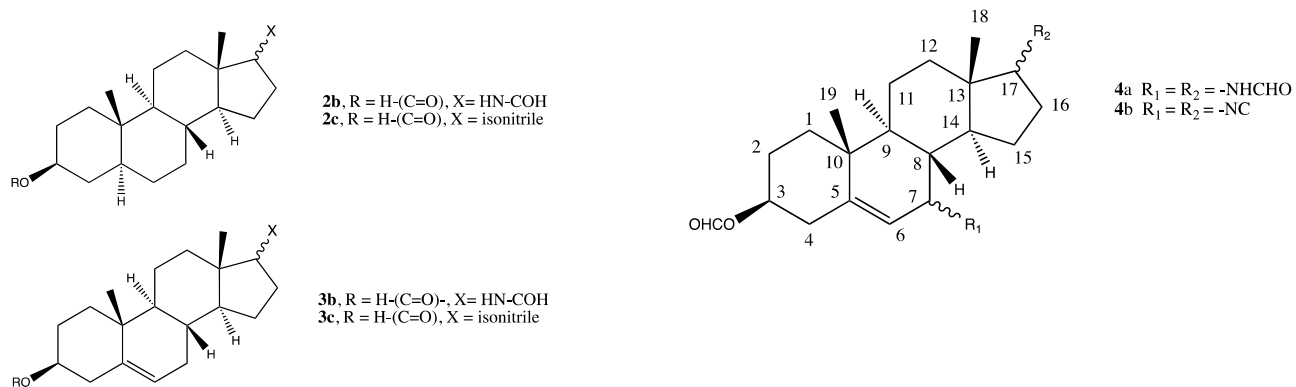

25

26

**27** *3β*-formyl-(*R*)-(20-amidoformyl)pregnane **1b**. 2g of 3β-hydroxy-5α-pregnan-20-one **1a** (3.2 mmole) (CAS  
**28** 516-55-2, Oakwood Chemical, Estill SC) was added to 4 mL of 95% formic acid and 4.8 mL of formamide in a  
**29** Pyrex test tube equipped with a magnetic stir bar. The test tube was stoppered with glass wool and heated  
**30** to 165 °C on an aluminum heating block with stirring and held at temperature for 3 hours. After cooling, the  
**31** two-phase mixture was mixed with sufficient benzene to dissolve the solid upper layer. The organic layer  
**32** was filtered to remove unreacted **1a**, which is relatively insoluble in benzene, then washed 2x with saturated  
**33**  $\text{NaHCO}_3$  solution, dried over anhydrous  $\text{Na}_2\text{SO}_4$ , filtered, evaporated and recrystallized from benzene.  
**34** Reversed phase HPLC of the first crop of recrystallized material ( $\text{C}_{18}$  column, acetonitrile/water gradient  
**35** 20/80 → 90/10, detection at 210 nm) showed evidence for several products, and  $^1\text{H}$ ,  $^{13}\text{C}$  NMR of the isolated  
**36** fractions confirmed that R and S epimers of the formamide are present in ~2:1 proportion. Furthermore,  
**37** two conformational isomers were observed at slow exchange on the  $^1\text{H}$  chemical shift time scale for both  
**38** epimers, presumably due to slow interconversion of the *cis* and *trans* NH-CHO forms (only the more upfield

39 <sup>1</sup>H shifts for the two forms are reported below). Finally, the 3β-hydroxy group was esterified by formic acid  
40 in ~90% of the first recrystallization, based on NMR signal intensities.

41 The second crop of crystals from benzene, 0.78 g fine needles were obtained, m.p. 175-180 °C, was  
42 determined by NMR to be essentially pure 20-(R)-**1b**, and was used for the isonitrile synthesis.

43 \*)<sup>1</sup>H NMR (d<sub>6</sub>-benzene): H1 (0.74, 1.50); H2 (0.72,1.50); H3 (4.83); H4 (1.31,1.55); H5 (0.86); H6, 1.06; H7,  
44 1.31, 1.54; H8, (R<sub>20</sub>, 1.13; S<sub>20</sub> 1.80); H9 (0.42); H11 (S<sub>20</sub>, 1.10, 1.35; R<sub>20</sub> α, 1.44; R<sub>20</sub> β, 0.87); H12, 1.76, 1.47;  
45 H14, 0.77; H15 (S<sub>20</sub> α 1.50, S<sub>20</sub> β, 2.34; R<sub>20</sub> α, 1.31; R<sub>20</sub> β, 1.11); H16 (S<sub>20</sub> α 1.03, S<sub>20</sub> β, 1.59; R<sub>20</sub> α, 1.72; R<sub>20</sub> β,  
46 0.82); H17 (S<sub>20</sub>, 0.98 R<sub>20</sub>, 0.87); H18 (S<sub>20</sub>, 0.56; R<sub>20</sub>, 0.63); H19 (0.59); H20 (S<sub>20</sub>, 4.02; R<sub>20</sub>, 4.06); H21 (S<sub>20</sub>, 0.97;  
47 R<sub>20</sub>, 0.85), formamide NH (S<sub>20</sub>, 5.28, exch. 4.04; R<sub>20</sub>, 5.86, exch. 4.19); formamide H(CO) (S<sub>20</sub>, 7.59; R<sub>20</sub>, 7.74);  
48 formate H(CO) (7.74)

49 <sup>13</sup>C NMR (d<sub>6</sub>-benzene): C1, 33.3; C2, 38.0; C3, 74.5; C4, 35.5; C5, 45.0; C6, 29.8; C7, 35.5; C8, 36.6; C9, 55.6;  
50 C10, 37.4; C11, 25.2; C12, 29.0; C13 (R<sub>20</sub>, 42.9; S<sub>20</sub>, 45.9); C14, 57.6; C15, (S<sub>20</sub>, 21.6; R<sub>20</sub>, 22.5); C16 (R<sub>20</sub>, 40.9;  
51 S<sub>20</sub>, 40.0); C17 (R<sub>20</sub>, 57.7; S<sub>20</sub>, 56.4); C18 (R<sub>20</sub>, 13.8; S<sub>20</sub>, 12.6); C19, 13.3; C20 (R, 46.4; S, 50.4); C21 (R<sub>20</sub>, 22.7;  
52 S<sub>20</sub>, 23.3); formamide carbonyl (R<sub>20</sub>, 160.4; S<sub>20</sub>, 163.7); formate carbonyl (161.3).

53 <sup>15</sup>N NMR (in d<sub>6</sub>-benzene): formamide R<sub>20</sub>, 136.1; S<sub>20</sub>, 102.6.

54 HRMS (**1b**): calculated for C<sub>23</sub>H<sub>38</sub>NO<sub>3</sub> (M+1), 376.2852, observed, 376.2835

55 Peaks eluted from C18 reverse phase HPLC (acetonitrile/water gradient), 72% ACN and 73% ACN.

56 *3β-formyl-(R)-(20-isonitrilo)pregnane 1c*. (Identified as compound **1** in the Communication) After drying  
57 over P<sub>2</sub>O<sub>5</sub> in a vacuum desiccator, 0.265 mg (0.8 mmol) of recrystallized 20-(R)-**1b** was dissolved in 0.8 mL  
58 (3.2 mmole) of dry pyridine under N<sub>2</sub> with stirring and cooled in an ice bath. 80 μL (0.8 mmol) of POCl<sub>3</sub>  
59 (Sigma) was added slowly dropwise. After all of the POCl<sub>3</sub> was added, the ice bath was removed, and the  
60 reaction allowed to proceed for ~2 h. The reaction mixture slowly darkened, and when no further color  
61 change was observed, the reaction was quenched with the addition of ice chips and 1 mL of saturated  
62 NaHCO<sub>3</sub> solution. The reaction mixture was extracted with diethyl ether (5 mL x3), the aqueous layer  
63 discarded and the organic layer filtered through anhydrous Na<sub>2</sub>SO<sub>4</sub>. Solvent was removed by a gentle stream  
64 of N<sub>2</sub> without heating, and excess pyridine removed using a SpeedVac. The resulting solid was examined by  
65 IR spectroscopy to confirm the presence of the isonitrile group, which exhibits a sharp absorption band at  
66 2138 cm<sup>-1</sup>.

67 <sup>1</sup>H NMR **1c** (d<sub>6</sub>-benzene): H1, 0.70, 1.43; H2, 1.41,1.73; H3, 4.79; H4, 1.27,1.51; H5, 0.85; H6, 1.01,1.05; H7,  
68 0.69, 1.45; H8, 1.01; H9, 0.32, 0.39; H11, 1.06, 1.30; H12, 0.76, 1.52; H14 (R<sub>20</sub>, 0.68); H15 (R<sub>20</sub> α, 1.45; R<sub>20</sub> β,  
69 1.84); H16 (R<sub>20</sub> α, 1.42; R<sub>20</sub> β, 0.72); H17 (R<sub>20</sub>, 1.12); H18 (R<sub>20</sub>, 0.34); H19, 0.56; H20 (R<sub>20</sub>, 3.11); H21 (R<sub>20</sub>,  
70 0.75).

71 <sup>13</sup>C NMR **1c** (d<sub>6</sub>-benzene): C1, 37.1; C2, 28.1; C3, 73.2; C4, 34.7; C5, 44.9; C6, 28.9; C7, 32.5; C8, 35.4; C9,  
72 54.5; C10, 36.9; C11, 21.4; C12, 32.7; C13 (R<sub>20</sub>, 43.0; S<sub>20</sub>, 42.3); C14 (R<sub>20</sub>, 56.3); C15 (R<sub>20</sub>, 26.9); C16 (R<sub>20</sub>, 39.1);  
73 C17 (R<sub>20</sub>, 55.8); C18 (R<sub>20</sub>, 12.5); C19, 12.4; C20 (52.4); C21 (R<sub>20</sub>, 22.4); isonitrile C (R<sub>20</sub>, 158.1 (broad)).

74 HRMS (**1c**): calculated for C<sub>22</sub>H<sub>35</sub>NO<sub>2</sub> (M+1), 358.2747, observed, 358.2741

75 **1c** was eluted from C18 reverse phase HPLC (acetonitrile/water gradient), 95% ACN.

76 *3β-formyl-(R,S)-(17-amidoformyl)androstane* **2b**. 1g of 3β-hydroxy-5α-androstan-17-one **1** (2.9 mmole)  
77 (CAS 481-29-8, Sigma) was added to 2 mL of 95% formic acid and 2.4 mL of formamide in a Pyrex test tube  
78 equipped with a magnetic stir bar. The test tube was stoppered with glass wool and heated to 175 °C on an  
79 aluminum heating block with stirring and held at temperature for 4 hours. After cooling, the solid mass was  
80 extracted with CH<sub>2</sub>Cl<sub>2</sub>. After removal of solvent from the extract, the product was recrystallized from a  
81 minimal amount of ethanol and CH<sub>2</sub>Cl<sub>2</sub> by slow evaporation. Based on relative NMR signal intensities, the  
82 recrystallized product is approximately 95:5 S<sub>17</sub>:R<sub>17</sub> epimers.

83 <sup>1</sup>H NMR **2b** (d<sub>6</sub>-benzene): H1, 1.38, 1.59; H2, 1.52,1.80; H3, 4.77; H4 1.64,1.69; H5, 1.12; H6, 1.39,1.77; H7,  
84 0.86, 1.63; H8, 1.32; H9, 0.62; H11, 1.20, 1.51; H12, 0.95, 1.55; H14, (R<sub>17</sub>, 1.03; S<sub>17</sub> 0.93) H15 (R<sub>17</sub>, 1.15, 1.67;  
85 S<sub>17</sub>, 1.17,1.61); H16 (R<sub>17</sub>, 2.21,1.29; S<sub>17</sub>, 1.96,1.22); H17 (R<sub>17</sub>, 3.31; S<sub>17</sub>, 3.10); H18 (R<sub>17</sub>, 0.71; S<sub>17</sub>, 0.64); H19  
86 0.78; formamide 17-HN (R<sub>17</sub>, 7.09; S<sub>17</sub>, 7.15); formamide 17-HCO (R<sub>17</sub>, 7.86; S<sub>17</sub>, 7.93); 3-HCO, 7.96.

87 <sup>13</sup>C NMR **2b** (d<sub>6</sub>-benzene): C1, 33.9; C2, 27.3; C3, 73.5; C4, 36.7; C5, 44.5; C6, 31.2; C7, 31.5; C8, 35.5; C9, 54.1;  
88 C10, 35.5; C11, 20.5; C12, 36.5; C13 (R<sub>17</sub>, 44.8; S<sub>17</sub>, 42.9); C14 (R<sub>17</sub>, 50.0; S<sub>17</sub>, 52.4); C15 (R<sub>17</sub>, 24.6; S<sub>17</sub>, 23.4); C16  
89 (R<sub>17</sub>, 29.8; S<sub>17</sub>, 28.3); C17 (R<sub>17</sub>, 61.6; S<sub>17</sub>, 63.0); C18 (R<sub>17</sub>, 18.1; S<sub>17</sub>, 11.6); C19, 12.1; formamide carbonyl (R<sub>17</sub>,  
90 165.2; S<sub>17</sub>, 165.1); 3-CHO, 160.9.

91 <sup>15</sup>N NMR **2b** (d<sub>6</sub>-benzene): formamide S<sub>17</sub>, 115.6; R<sub>17</sub>, 121.7.

92 HRMS (**2b**): calculated for C<sub>21</sub>H<sub>34</sub>NO<sub>3</sub> (M+1), 348.2539, observed, 348.2526

93 **2b** eluted from C18 reverse phase HPLC (acetonitrile/water gradient), 70% ACN (R<sub>17</sub>) and 72% ACN (S<sub>17</sub>).

94 *3β-formyl-(R,S)-(17-amidoformyl)androst-5,6-ene* **3b**. 1g of 3β-hydroxy-5α-androst-5,6-ene-17-one **3a** (2.9  
95 mmole, CAS 481-29-8, Sigma) was added to 2 mL of 95% formic acid and 2.4 mL of formamide in a Pyrex test  
96 tube equipped with a magnetic stir bar. The test tube was stoppered with glass wool and heated to 175 °C  
97 on an aluminum heating block with stirring and held at temperature for 6 hours. After cooling, the solid mass  
98 was extracted with CH<sub>2</sub>Cl<sub>2</sub>. The product was recrystallized from a minimal amount of hexanes and CH<sub>2</sub>Cl<sub>2</sub> by  
99 slow evaporation, m.p. 255 °C, By NMR, product formamide was determined to be >9:1 S<sub>17</sub> :R<sub>17</sub>.

100 <sup>1</sup>H NMR **3b** (d-chloroform): H1, 1.16, 1.89; H2 1.65, 1.90; H3, 4.73; H4, 2.35 ; H6, 5.40; H7, 1.58, 2.01; H8,  
101 1.32; H9, 1.16; H11, 1.35, 1.63; H12, 1.08,1.75; H14, (R<sub>17</sub>, 1.05; S<sub>17</sub> 1.13); H15 (R<sub>17</sub>, 1.44, 1.61; S<sub>17</sub>, 1.40,  
102 1.58); H16 (R<sub>17</sub> α 1.51, R<sub>17</sub> β, 2.09; S<sub>17</sub> α, 1.36; S<sub>17</sub> β, 2.14); H17 (S<sub>17</sub>, 3.26; R<sub>17</sub>, 3.41); H18, 0.73; H19, 1.04;  
103 formamide 17-HN (R<sub>17</sub>, 6.10; S<sub>17</sub>, 5.56); formamide 17-HCO (R<sub>17</sub>, 8.03; S<sub>17</sub>, 8.20); 3-HCO, 8.04.

104 <sup>13</sup>C NMR **3b** (d-chloroform): C1, 36.9; C2, 27.5; C3, 73.8; C4, 42.2; C5, 139.4; C6, 122.6; C7, 31.5; C8, 35.4;  
105 C9, 53.9; C10, 37.32; C11, 20.25; C12, 36.2; C13 (R<sub>17</sub>, 42.8; S<sub>17</sub>, 42.9); C14 (R<sub>17</sub>, 52.8; S<sub>17</sub>, 52.8); C15 (R<sub>17</sub>, 20.4;  
106 S<sub>17</sub>, 20.5); C16 (R<sub>17</sub>, 28.8; S<sub>17</sub>, 28.6); C17 (R<sub>17</sub>, 62.6; S<sub>17</sub>, 57.5); C18, 11.7; C19, 19.12; formamide carbonyl (R<sub>17</sub>,  
107 164.2; S<sub>17</sub>, 164.3); 3-CHO, 160.4.

108 <sup>15</sup>N NMR **3b** (d-chloroform): formamide S<sub>17</sub>, 114.2; R<sub>17</sub>, 120.2.

109 HRMS (**3b**): calculated for C<sub>21</sub>H<sub>32</sub>NO<sub>3</sub> (M+1), 346.24382, observed, 346.2365

110 Peaks eluted from C18 reverse phase HPLC (acetonitrile/water gradient), 68% ACN (S<sub>17</sub>) and 70% ACN (R<sub>17</sub>).

111 Isonitrile derivatives **2c** and **3c** (identified as compounds **2** and **3** in the Communication) were  
112 prepared from compounds **2b** and **3b** as **1d** above. Presence of the isonitrile group was confirmed

113 in each case by a strong narrow infrared absorbance band at 2138 cm<sup>-1</sup> in the products after removal  
114 of solvent and excess pyridine under vacuum at room temperature.

115  
116 <sup>1</sup>H NMR (**2c**) (d<sub>6</sub>-DMSO): H1, 1.12, 1.79; H2 1.56, 1.86; H3, 4.77; H4, 1.64, 1.44; H5, 1.27; H6, 1.28, 1.34; H7,  
117 0.96, 1.71; H8, 1.44; H9, 1.09; H11, 1.36, 1.65; H12, 1.77, 2.25; H14, 0.76; H15, 1.36, 1.69; H16, 1.23, 1.80;  
118 H17 (S<sub>17</sub>, 3.82; R<sub>17</sub>, 3.61); H18, (S<sub>17</sub>, 0.82; R<sub>17</sub>, 0.90); H19, 1.10; 3-HCO, 8.31.

119 <sup>13</sup>C NMR (**2c**) (d<sub>6</sub>-DMSO): C1, 36.5; C2, 27.7; C3, 73.4; C4, 34.3; C5, 44.5; C6, 28.0; C7, 31.7; C8, 36.3; C9,  
120 51.4; C10, 36.0; C11, 23.8; C12, 29.4; C13 (R<sub>17</sub>, 50.0; S<sub>17</sub>, 43.6); C14, 53.8; C15 20.7; C16 (R<sub>17</sub>, 45.1; S<sub>17</sub>, 35.9);  
121 C17 (R<sub>17</sub>, 62.6; S<sub>17</sub>, 62.1); C18, 13.0; C19, 12.5; isonitrile C (S<sub>17</sub>, 156.5; R<sub>17</sub>, 156.1); 3-CHO, 162.3.

122 <sup>15</sup>N NMR (**2c**) (d<sub>6</sub>-DMSO): isonitrile S<sub>17</sub>, 180.0; R<sub>17</sub>, 193.4.

123 **2c** HRMS (identified as compound **2** in the communication): calculated for C<sub>21</sub>H<sub>32</sub>NO<sub>2</sub> (M+1), 330.2433,  
124 observed 330.2417

125 Peak eluted from C18 reverse phase HPLC (acetonitrile/water gradient), 88% ACN.

126 <sup>1</sup>H NMR (**3c**) (d<sub>6</sub>-DMSO): H1, 1.21, 1.97; H2 1.70, 1.72; H3, 4.65; H4, 2.42, 2.42; H6, 5.47; H7, 1.72, 2.08; H8,  
127 1.53; H9, 1.10; H11, 1.55, 1.72; H12, 1.28, 1.84; H14, 1.37; H15, (S<sub>17</sub>, 2.07, 1.72; R<sub>17</sub>, 2.36, 1.84); H16, (S<sub>17</sub>,  
128 1.28, 1.84; R<sub>17</sub>, 1.22, 1.78); H17 (R<sub>17</sub>, 3.60; S<sub>17</sub>, 3.82); H18, 0.86; H19, 0.90; 3-HCO, 8.27.

129 <sup>13</sup>C NMR (**3c**) (d<sub>6</sub>-DMSO): C1, 36.9; C2, 23.7; C3, 73.6; C4, 37.7; C5, 140.4; C6, 122.8; C7, 31.9; C8, 32.1; C9,  
130 50.1; C10, 33.7; C11, 20.5; C12, 35.7; C13 (S<sub>17</sub>, 45.5; R<sub>17</sub>, 43.5); C14, 50.2; C15 (S<sub>17</sub>, 31.8; R<sub>17</sub>, 31.4); C16 (S<sub>17</sub>,  
131 35.8; R<sub>17</sub>, 36.8); C17 (S<sub>17</sub>, 62.7; R<sub>17</sub>, 62.3); C18, (S<sub>17</sub>, 16.7; R<sub>17</sub>, 12.6); C19, 19.5; isonitrile C (S<sub>17</sub>, 156.2; R<sub>17</sub>,  
132 156.9); 3-CHO, 162.3.

133 <sup>15</sup>N NMR (**3c**) (d<sub>6</sub>-DMSO): isonitrile S<sub>17</sub>, 183.9; R<sub>17</sub>, 179.4.

134 **3c** HRMS\_calculated for C<sub>20</sub>H<sub>30</sub>NO (M+1, free 3-OH), 300.2327, found 300.2308

135 Peak eluted from C18 reverse phase HPLC (acetonitrile/water gradient), 80% ACN.

136 *3β-formyl-(R,S)-(7,17-bis-amidoformyl)androst-5,6-ene 4a* was prepared as with compounds **1-3**, starting  
137 from androstene-3β-hydroxy-5,6-dehydro-7,17-dione (CAS 566-19-8, Steraloids, Inc., Newport, RI).

138 <sup>1</sup>H NMR **4a** (d<sub>6</sub>-acetone): H1, 1.26, 1.94; H2 1.68, 1.88; H3, 4.87; H4, 1.95, 1.92; H6, 5.80; H7, 4.49; H8, 1.87;  
139 H9, 1.35; H11, 1.51, 1.79; H12, 1.34, 1.83; H14, 1.47; H15, 1.61, 2.11; H16 α 1.31, 1.29; β, 1.81; H17  
140 (epimer 1, 3.45; epimer 2, 4.01); H18, 0.87; H19, 1.1; formamide 7-NH, 7.37; 17-NH, 7.17; formamide 7-  
141 HCO 8.18; 17-HCO, 8.24; 3-HCO, 8.19.

142 <sup>13</sup>C NMR **4a** (d<sub>6</sub>-acetone): C1, 33.1; C2, 24.1; C3, 73.3; C4, 33.2; C5, 142.6; C6, 127.2; C7, 49.3; C8, 37.7; C9,  
143 48.6; C10, 34.6; C11, 20.6; C12, 36.8; C13 43.7; C14, 52.8; C15 28.2; C16 (epimer 1, 37.1; epimer 2, 36.1);  
144 C17 (epimer 1, 56.9; epimer 2, 62.9); C18, 11.5; C19, 17.8; formamide carbonyl (7-, 160.3; 17-, 160.8); 3-  
145 CHO, 162.3.

146 <sup>15</sup>N NMR **4a** (d<sub>6</sub>-acetone): 7-N, 135.3; 17-N, 125.6

147 *3β-formyl-(R,S)-(7,17-bis-isonitrilo)androst-5,6-ene 4b* The crude 7,17-diformamide **4a** was dried over P<sub>2</sub>O<sub>5</sub>  
148 in vacuum and used to prepare the isonitrile as above. After 3x extraction of the crude neutralized reaction  
149 mixture with diethyl ether, the dehydration of **4a** to **4b** was found to be essentially complete by NMR. Based  
150 on integration of the C7 1H peak, the major isonitrile at that position is produced in ~4:1 over the minor  
151 epimer. NOEs between 7H, 9H and 14H that the major epimer isonitrile at the 7 position is in the *R*-  
152 configuration. At the 17 position, the isonitrile is ~10:1 *S*-configuration, based on NOEs between the 17,  
153 15 and 16 (but not 18-CH<sub>3</sub>) protons. Some evidence of dehydration by loss of the 3-hydroxyl group is present  
154 in the isonitrile spectrum, in the form of new vinyl protons (presumably at 3- and 4- positions). The presence  
155 of the isonitrile was confirmed by IR spectroscopy, with a strong absorption band at 2138 cm<sup>-1</sup>.

156 <sup>1</sup>H NMR **4b** (d<sub>6</sub>-DMSO): H1, 1.14, 1.87; H2 1.79, 1.97; H3, 4.77; H4, 1.87, 1.87; H6, 5.37 (R), 5.28 (S); H7, 4.30  
157 (R), 4.28 (S); H8, 1.93; H9, 1.16; H11, 1.47, 1.75; H12, 1.27, 1.84; H14, 1.42; H15, 1.83, 2.30; H16, 1.28, 1.84  
158 (S), 1.27, 1.82 (R); β, 1.81; H17, 3.65 (S), 3.74 (R); H18, 0.95 (S), 0.91 (R); H19, 1.06; 3-HCO, 8.27.

159 <sup>13</sup>C NMR **4b** (d<sub>6</sub>-DMSO): C1, 33.0; C2, 25.3; C3, 73.4; C4, 33.0; C5, 144.4; C6, 119.7 (R), 117.8 (S); C7, 55.3  
160 (R), 55.7 (S); C8, 39.3; C9, 46.7; C10, 34.6; C11, 20.5; C12, 35.3; C13, 44.2; C14, 52.8; C15 29.4; C16, 35.4 (S),  
161 35.3 (R); C17, 61.9 (S), 61.9 (R)); C18, 12.7 (S), 12.6 (R); C19, 18.5; 3-CHO, 162.8, 7-NC, 156.6, 17-NC, 156.6.

162 <sup>15</sup>N NMR **4b** (d<sub>6</sub>-DMSO): 7-NC, 185.0; 17-NC, 177.4

163 HRMS for C<sub>22</sub>H<sub>28</sub>N<sub>2</sub>O<sub>2</sub> (M+1), 353.2230, found 353.2224.

164 Peak eluted from C18 reverse phase HPLC (acetonitrile (ACN)/water gradient), 70% ACN.

165 **\*) Note on NMR assignments and spectra:** All NMR assignments are numbered according to the accepted  
166 IUPAC system for gonane and steranes, shown in the structure above for compound **4**. Relevant NMR  
167 spectra used for resonance assignment of all isonitrile compounds 1-4 are deposited as Supplementary  
168 Data 1.

169 **NMR spectroscopy.** All two-dimensional NMR experiments used for resonance and stereochemical  
170 assignments were performed on a Bruker NEO spectrometer at the Landsman Research Facility (Brandeis  
171 Univ.) operating at 800.13 MHz (<sup>1</sup>H), 201.19 MHz (<sup>13</sup>C) and 81.08 MHz (<sup>15</sup>N). All <sup>1</sup>H and <sup>13</sup>C chemical shifts  
172 are reported in ppm relative to tetramethylsilane; <sup>15</sup>N shifts are reported in ppm relative to anhydrous  
173 ammonia. For assigning <sup>1</sup>H and <sup>13</sup>C correlations, <sup>1</sup>H,<sup>13</sup>C-HSQC and HMBC experiments were performed.  
174 Formamide <sup>15</sup>N resonances were assigned using natural abundance <sup>1</sup>H,<sup>15</sup>N-HSQC, and <sup>1</sup>H,<sup>15</sup>N-HMBC used for  
175 assigning isonitrile <sup>15</sup>N resonances. Stereochemistry at reaction centers was established by analysis of <sup>1</sup>H,<sup>1</sup>H  
176 NOESY experiments, based on the known stereochemistry of steroid starting materials, except in the case of  
177 **1c**, in which the crystal structure of the CYP17A1-**1c** complex provided the stereochemical relationship at C<sub>20</sub>.

178 **Infrared spectroscopy.** Infrared spectra were recorded on a diamond anvil-equipped Nicolet FTIR  
179 spectrometer.

180 **High-resolution mass spectrometry.** High-resolution mass spectra were obtained at the Brandeis University  
181 interdepartmental mass spectrometry facility on a Bruker timsTOF Pro mass spectrometer operating in  
182 positive ion mode in tandem with liquid chromatographic separation of analytes.

183

184

## 185 **S2) Ligand binding and inhibition assays**

186 **Reduction and reoxidation assays.** Reduction of the isonitrile-bound P450 complex was observed by taking  
187 a baseline absorbance reading from 400 to 500 nm using a UV-visible scanning spectrophotometer, of a 1cm  
188 quartz cuvette containing 1  $\mu$ M P450, with the selected isonitrile compound at a saturating concentration  
189 (*i.e.*,  $\geq$  concentration needed to reach  $\Delta A_{\max}$ ), in the same buffer used for binding assays (100 mM potassium  
190 phosphate buffer (pH 7.4), 20% glycerol, and 100 mM sodium chloride). A small quantity of sodium dithionite  
191 (spatula tip-full) was then added to the cuvette, and the spectra were recorded periodically over time to  
192 observe the formation of peaks indicating the reduction ( $\sim$ 426 and 456 nm) and subsequent reoxidation  
193 ( $\sim$ 435 nm) of the complex. The total time course for Figure 6B was 103 minutes and 37 seconds.

194 **CYP17A1 Inhibition assay.** (Adapted from DeVore, NM, Scott, EE. (2012). *Nature*, 482(7383), 116-119.)  
195 Metabolic activity of CYP17A1 was evaluated by measuring 17 $\alpha$ -hydroxylation of progesterone as detected  
196 by HPLC with UV detection at 240 nm. A 1:4 ratio of CYP17A1 to recombinant NADPH-cytochrome P450  
197 reductase was mixed and incubated on ice for 20 minutes. This mixture was added to buffer (50 mM Tris, pH  
198 7.4, 5 mM MgCl<sub>2</sub>) containing 11.5 mM progesterone and either abiraterone (0-1  $\mu$ M) or **1c** (0-50  $\mu$ M).  
199 Reaction vials were warmed to 37 °C for three minutes, then catalysis was initiated by adding NADPH to a  
200 final concentration of 1 mM. After 10 minutes, metabolism was quenched by adding 300  $\mu$ L of 20%  
201 trichloroacetic acid and placed on ice. The reaction vials were centrifuged to pellet the precipitated protein,  
202 then the supernatant was injected onto a C18 column (Phenomenex, Luna, 50 x 4.6 mm) for HPLC. The 30-  
203 minute HPLC method ran at 0.8 mL/min and started with a mobile phase of 60% acetonitrile, 40% water with  
204 0.2% acetic acid for five minutes, increased to 80% acetonitrile over 10 minutes, held at 80% acetonitrile for  
205 five minutes, 100% acetonitrile for five minutes, then returned to 60% acetonitrile to prepare for the next  
206 sample. Metabolite elution was normalized to  $\beta$ -estradiol as an internal standard. A standard curve of known  
207 product concentrations was used to convert normalized area under curve to amount of product produced. A  
208 four-parameter variable-slope equation ( $Y=Y_{\min} + (Y_{\max}-Y_{\min})/(1+(IC_{50}/X)^{\text{Hill Slope}})$ ) was used to fit the data  
209 and calculate IC<sub>50</sub> values for inhibitors using GraphPad Prism 9.

210 **CYP3A4 nifedipine metabolism assay.** (Adapted from Bart, AG, Scott, EE. (2017). *J. Biol. Chem.*, 292(51),  
211 20818–20833.) Metabolic activity of CYP3A4 was evaluated by measuring metabolism of nifedipine to  
212 dehydronifedipine, as detected by HPLC with UV detection at 254 nm. Reactions were carried out in amber  
213 microcentrifuge tubes (NFP is light sensitive) in a final volume of 150  $\mu$ L. A 1:2 ratio of CYP3A4 to recombinant  
214 NADPH-cytochrome P450 reductase was mixed and incubated at room temperature for 20 minutes. This  
215 mixture was added to buffer (40 mM HEPES, 30 mM MgCl<sub>2</sub>, pH 7.4) containing 0.1 mM NFP and increasing  
216 concentrations of **1c** (0-100  $\mu$ M). Reaction vials were warmed to 37 °C for three minutes, then catalysis was  
217 initiated by adding NADPH to a final concentration of 1 mM. After 20 minutes, metabolism was quenched  
218 by adding 50  $\mu$ L acetonitrile and placed on ice. The reaction vials were centrifuged at 5000 xg for 5 minutes  
219 to pellet the precipitated protein, then the supernatant was injected onto a C18 column (Phenomenex, Luna,  
220 50 x 4.6 mm) for HPLC. Separation on HPLC was obtained using a mobile phase of 45%/55% water/methanol  
221 for 40 minutes. A standard curve of known product concentrations was used to convert the area under the  
222 curve to the amount of product produced.

223

## 224 **S3) Crystallization of 1-CYP17A1 complex and X-ray diffraction**

225 **Protein Crystallization and Structure Determination.** CYP17A1 was saturated with 3 $\beta$ -formyl-5 $\alpha$   
226 pregnanolone-20(R)-isonitrile (verified by 430 nm Soret peak) and prepared for crystallization via hanging

227 drop vapor diffusion. A protein solution of 30 mg/mL CYP17A1 in 50 mM Tris-HCl (pH 7.4), 20% glycerol, 500  
228 mM NaCl, and 0.2% Emulgen 913 was equilibrated against 0.1 M Tris-HCl (pH 8.5), 0.25 M LiSO<sub>4</sub>, 30% PEG  
229 3350, and 7% sucrose at 22 degrees C. Crystals appeared after 48 hours. Crystals were cryoprotected in  
230 mother liquor supplemented with 24% glycerol and flash cooled in liquid nitrogen. Diffraction data was  
231 collected at 100 K at the Stanford Synchrotron Radiation Laboratory beamline 12-2. Data were processed  
232 to 2.2 Angstroms using XDS<sup>1</sup> and Scala<sup>2</sup>. The structure was solved by molecular replacement using PHASER<sup>3</sup>  
233 with a search model based on CYP17A1 complexed with 3-keto-5a-abiraterone (PDB 6WW0). Iterative model  
234 building and structure refinement were accomplished using COOT<sup>4</sup> and Phenix.refine<sup>5</sup>. Validation of this  
235 structure was performed in Phenix<sup>5</sup>. X-ray data statistics are provided in Table S1. All figures were made  
236 using PyMOL<sup>6</sup>. Full coordinates are available as Supplemental Data 2.

237



238 **Table S1. X-ray data collection, refinement, and validation statistics.** Highest-resolution shell shown in  
 239 parentheses. Software used for structure refinement and visualization are referenced below.

| <b>CYP17A1 bound to 3<math>\beta</math>-formyl-5<math>\alpha</math>-<sup>240</sup><br/>pregnenolone-(R) C20-isonitrile <sup>241</sup></b> |                                               |
|-------------------------------------------------------------------------------------------------------------------------------------------|-----------------------------------------------|
| <b>Data collection</b>                                                                                                                    |                                               |
| Space group                                                                                                                               | P2 <sub>1</sub> 2 <sub>1</sub> 2 <sub>1</sub> |
| Cell dimensions                                                                                                                           |                                               |
| <i>A, b, c</i> (Å)                                                                                                                        | 86.13, 152.27, 171.59                         |
| $\alpha, \beta, \gamma$ (°)                                                                                                               | 90.00, 90.00, 90.00                           |
| Resolution (Å)*                                                                                                                           | 2.20                                          |
| Redundancy*                                                                                                                               | 13.4 (12.5)                                   |
| <i>R</i> <sub>pim</sub> *                                                                                                                 | 0.075 (1.453)                                 |
| Mn(I/sd)*                                                                                                                                 | 6.8 (0.9)                                     |
| CC ½*                                                                                                                                     | 0.997 (0.382)                                 |
| Completeness* (%)                                                                                                                         | 99.6 (99.1)                                   |
| Total Reflections*                                                                                                                        | 1,536,253 (206,362)                           |
| Unique Reflections*                                                                                                                       | 114,766 (16,489)                              |
| <b>Refinement</b>                                                                                                                         |                                               |
| Resolution (Å)                                                                                                                            | 38.96 - 2.20                                  |
| No. reflections                                                                                                                           | 113,087                                       |
| <i>R</i> <sub>work</sub> / <i>R</i> <sub>free</sub>                                                                                       | 0.216 / 0.259                                 |
| Number of non-hydrogen atoms / B factor                                                                                                   |                                               |
| Protein                                                                                                                                   | 14871 / 55.8                                  |
| Ligand                                                                                                                                    | 156 / 62.3                                    |
| Heme                                                                                                                                      | 172 / 45.3                                    |
| Solvent                                                                                                                                   | 268 / 49.6                                    |
| R.M.S deviations                                                                                                                          |                                               |
| Bond lengths (Å)                                                                                                                          | 0.005                                         |
| Bond angles (°)                                                                                                                           | 0.73                                          |
| Coordinate error (Maximum-likelihood) (Å)                                                                                                 | 0.30                                          |
| Ramachandran plot:                                                                                                                        | 96.7 / 3.2 / 0.11                             |
| preferred/allowed/outliers (%)                                                                                                            |                                               |

#### S4) Supplementary References

- 242  
243  
244 1. Kabsch, W., XDS. *Acta Crystallographica Section D: Biological Crystallography* **2010**, *66* (2), 125-132.  
245 2. Evans, P., Scaling and assessment of data quality. *Acta Crystallographica Section D* **2006**, *62* (1), 72-  
246 82.  
247 3. McCoy, A. J.; Grosse-Kunstleve, R. W.; Adams, P. D.; Winn, M. D.; Storoni, L. C.; Read, R. J., Phaser  
248 crystallographic software. *Journal of Applied Crystallography* **2007**, *40* (4), 658-674.  
249 4. Emsley, P.; Lohkamp, B.; Scott, W. G.; Cowtan, K., Features and development of Coot. *Acta*  
250 *Crystallographica Section D* **2010**, *66* (4), 486-501.  
251 5. Adams, P. D.; Afonine, P. V.; Bunkoczi, G.; Chen, V. B.; Davis, I. W.; Echols, N.; Headd, J. J.; Hung,  
252 L.-W.; Kapral, G. J.; Grosse-Kunstleve, R. W.; McCoy, A. J.; Moriarty, N. W.; Oeffner, R.; Read, R.  
253 J.; Richardson, D. C.; Richardson, J. S.; Terwilliger, T. C.; Zwart, P. H., PHENIX: a comprehensive  
254 Python-based system for macromolecular structure solution. *Acta Crystallographica Section D*  
255 **2010**, *66* (2), 213-221.  
256 6. DeLano, W. L. *The PyMOL Molecular Graphics System*, version 1.8.6.2; Schrodeinger, LLC: New York,  
257 2017.  
258
