# Supplementary material for: Selective steroidogenic cytochrome P450 haem iron ligation by steroid-derived isonitriles
Source: PubMed Central journal article supplement (PMC10475101; doi:10.1038/s42004-023-00994-3), 2023-09-02
Supplement: 42004_2023_994_MOESM2_ESM.pdf [file 42004_2023_994_MOESM2_ESM.pdf]

# Description of Additional Supplementary Files

**File name:** Supplementary Data 1

**Description:** NMR spectra used for assignment of compounds

**File name:** Supplementary Data 2

**Description:** PDB format coordinates of described complex

**File name:** Supplementary Data 3

**Description:** Excel format numerical data used to derive all graphs in figures.
